# Supplementary material for: Hydrogen bonding-promoted tunable approach for access to aza-bicyclo-[3.3.0]octanes and cyclopenta[b] pyrroles
Source: Royal Society of Chemistry journal article supplement (doi:10.1039/d4cc01065e), 2024-01-01
Supplement: d4cc01065e1.pdf [file d4cc01065e1.pdf]

**Supporting Information**

***A Hydrogen-Bonding Promoted Tunable Approach for the Access to Aza-bicyclo-  
[3.3.0]octanes and Cyclopenta[b] Pyrroles***

Sourav Pramanik,<sup>a</sup> Subhadeep Hazra,<sup>a†</sup> Ayan Chatterjee,<sup>a†</sup> Jaideep Saha<sup>\*b||</sup>

E-mail: [jdsaha2000@gmail.com](mailto:jdsaha2000@gmail.com); [jsaha@niper.ac.in](mailto:jsaha@niper.ac.in)

<sup>a</sup>Division of Molecular Synthesis and Drug Discovery, Centre of Biomedical Research (CBMR), SGPGIMS Campus. Raebareli Road, Lucknow 226014, Uttar Pradesh, India.

<sup>b</sup>Department of Medicinal Chemistry, National Institute of Pharmaceutical Education and Research, SAS Nagar, Mohali 160062, India

## Table of contents

| Entry | Description                                                            | Page   |
|-------|------------------------------------------------------------------------|--------|
| 1     | General Experimental.....                                              | 3      |
| 2     | Preparation and Characterization data of the starting materials.....   | 4-6    |
| 3     | General procedure and characterization data of compound <b>3-22...</b> | 7-21   |
| 4     | General procedure and characterization data of compound <b>23-34</b>   | 22-30  |
| 5     | General procedure for DDQ oxidation and characterization <b>35-40</b>  | 31-35  |
| 6     | Olefin reduction and characterization.....                             | 36-38  |
| 7     | Crystallographic Data.....                                             | 39-56  |
| 8     | NMR Spectra of New Compounds.....                                      | 57-106 |
| 9     | References.....                                                        | 107    |

## 1. General Experimental

Unless otherwise mentioned in the experimental procedures, all the new reactions reported in the manuscript were performed using oven-dried or flame-dried glassware under argon/nitrogen atmosphere and stirred on a magnetic stirrer. Solvents received from commercial sources were used as received or dried using standard protocols before using in this study; freshly distilled THF was used in the study. Unless noted, all the reagents and catalysts were used as it was received from commercial sources and no further purification was made on those. TLC was performed using Merck silica gel 60 F 254 plates and used for reaction monitoring. TLC plates were visualized either under standard conditions; UV light (254 nm) or by using 10% ethanolic phosphomolybdic acid (PMA) or 1% aqueous  $\text{KMnO}_4$  or iodine. Silica gel of 230-400 mesh size was used for the flash column chromatography. The  $^1\text{H}$ ,  $^{13}\text{C}$  NMR spectra were recorded on Avance III, Bruker at 400 MHz, 100 MHz and 376 MHz spectrometers respectively using  $\text{CDCl}_3$ . In the experimental section, the  $^1\text{H}$  NMR chemicals shift are expressed in the form of ppm ( $\delta$ ) relative to  $\delta = 7.26$  for  $\text{CDCl}_3$  whereas  $^{13}\text{C}$  NMR chemical shift are expressed relative to  $\delta = 77.16$ . The following abbreviations were used to refer to multiplicities: s = singlet, d = doublet, dd = doublet of doublets, t = triplet, q = quartet, m = multiplet. HRMS and Electron Spray Ionization (ESI) ( $m/z$ ) spectra were recorded on Agilent Technologies 6530 Accurate Mass Q-TOF LC/MS.

## 2. Preparation of the starting material

2.1. Preparation of 4-aminocyclopentenones: Following 4-aminocyclopentenone derivatives (**1a-1k**),<sup>1</sup> (**1l-1n**)<sup>2</sup> were used in the study and prepared following the literature procedures.

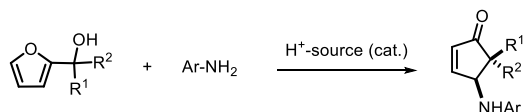

General Procedure: In a solution of furfurylcarbinol (1.0 equiv) and aniline (1.0 equiv) in CH<sub>3</sub>CN (0.2 M to 0.05 M) was added catalytic acid (phosphomolybdic acid: 1.5 mol% or pTsOH: 10 mol%). The reaction mixture was placed in an oil bath (pre-heated at 85 °C) and progress was monitored via TLC. Upon completion of the reaction (ca. 2-3 h), water was added to the mixture and extraction was performed in ethyl acetate (3 × 100 mL). Combined organic layer was collected, washed with Brine (50 ml × 1), dried over anhydrous Na<sub>2</sub>SO<sub>4</sub>, filtered and concentrated in reduced pressure. The crude residue was purified by silica gel column chromatography to afford the 4-aminocyclopentenones.

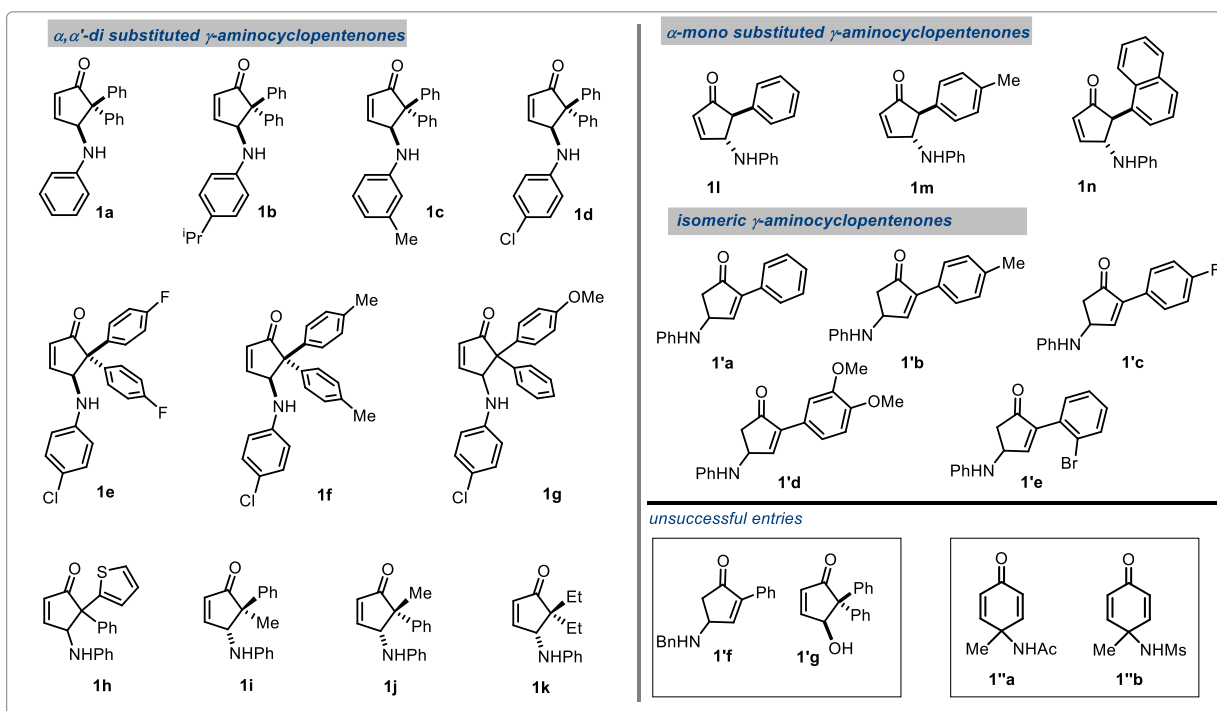

**Figure S1:** List of  $\gamma$ -aminocyclopentenones and other related structures used in the study

## 2.2. Preparation of alkyne derivative:

Alkyne derivative **2a** and **2b** are commercially available. Compounds **2c-2i**<sup>3</sup> and **2j**<sup>4</sup> were prepared following the literature procedure.

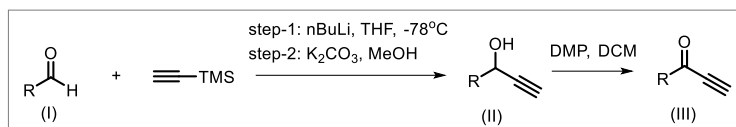

BuLi (1.05 equiv. 1.6 M in Hexane) solution was added dropwise to a precooled (-78°C) solution of TMS-acetylene (1.1 equiv.) in dry THF. After stirring for 1h, a solution of aldehyde (I) in THF was added to this mixture. After further stirring for 0.5-1.0 h, the reaction mixture was slowly warmed up to room temperature and quenched with water, and diluted with diethyl ether. The organic layer was collected, washed with brine, dried over anhy. Na<sub>2</sub>SO<sub>4</sub> filtered and concentrated in reduced pressure. The crude was then dissolved in MeOH and was treated with K<sub>2</sub>CO<sub>3</sub> (4.0 equiv) at room temperature. After consumption of the starting material (ca. 2h), the solvent was evaporated under reduced pressure. The crude was purified via silica gel column chromatography to obtain the propargyl alcohol (typical yields: 60-80%). Propargyl alcohol was then dissolved in dry DCM and was treated with Dess-Martin oxidant (1.1 equiv) at 0°C. After completion of the reaction (TLC monitored), the reaction mixture was passed through a short pad of celite, and the filtrate was with brine and sodium bicarbonate solution. The organic layer was dried over Na<sub>2</sub>SO<sub>4</sub> and concentrated. The crude was purified by silica gel column chromatography to obtain alkynes (III).

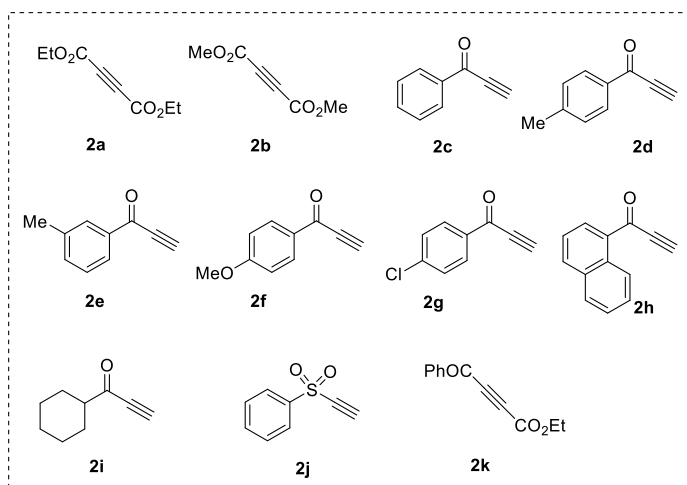

**Figure S2:** List of the alkyne used in the study

### 3. Characterization of newly synthesized $\gamma$ -aminocyclopentenones 2-(3,4-Dimethoxyphenyl)-4-(phenylamino)cyclopent-2-en-1-one (1'd)

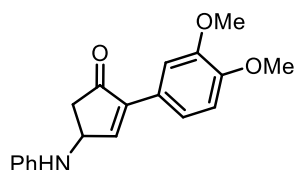

**$^1\text{H}$  NMR** (400 MHz,  $\text{CDCl}_3$ )  $\delta$  7.68 (d,  $J = 2.4$  Hz, 1H), 7.40 - 7.36 (m, 2H), 7.28 - 7.24 (m, 2H), 6.90 (d,  $J = 8.3$  Hz, 1H), 6.83 (t,  $J = 7.3$  Hz, 1H), 6.73 (d,  $J = 8.0$  Hz, 2H), 4.77 - 4.75 (m, 1H), 3.92 (d,  $J = 5.7$  Hz, 6H), 3.12 (dd,  $J = 18.6, 6.3$  Hz, 1H), 2.44 (dd,  $J = 18.6, 2.1$  Hz, 1H);  **$^{13}\text{C}\{^1\text{H}\}$  NMR** (100 MHz,  $\text{CDCl}_3$ )  $\delta$  205.0, 154.1, 149.9, 148.9, 146.6, 143.4, 129.6, 123.5, 120.4, 118.7, 113.7, 111.1, 110.4, 56.0(2), 51.0, 44.7; **HRMS(ESI-TOF)**  $m/z$ :  $[\text{M} + \text{Na}]^+$   $\text{C}_{19}\text{H}_{19}\text{NNaO}_3$  calcd. 332.1263, found, 332.1255.

### 2-(2-Bromophenyl)-4-(phenylamino)cyclopent-2-en-1-one (1'e)

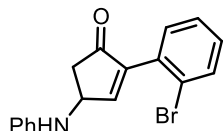

**$^1\text{H}$  NMR** (400 MHz,  $\text{CDCl}_3$ )  $\delta$  7.65 (d,  $J = 2.5$  Hz, 1H), 7.54 (dd,  $J = 8.0, 0.7$  Hz, 1H), 7.26 - 7.09 (m, 5H), 6.71 (t,  $J = 7.3$  Hz, 1H), 6.62 (d,  $J = 7.8$  Hz, 2H), 4.75 - 4.73 (m, 1H), 3.83 (s, 1H), 3.00 (dd,  $J = 18.6, 6.3$  Hz, 1H), 2.34 (dd,  $J = 18.6, 2.4$  Hz, 1H);  **$^{13}\text{C}\{^1\text{H}\}$  NMR** (100 MHz,  $\text{CDCl}_3$ )  $\delta$  203.6, 159.9, 146.5, 145.7, 133.2, 132.1, 130.9, 130.1, 129.6, 127.4, 122.9, 118.8, 113.7, 51.9, 43.5; **HRMS(ESI-TOF)**  $m/z$ :  $[\text{M} + \text{H}]^+$   $\text{C}_{17}\text{H}_{15}\text{BrNO}$  calcd. 328.0337, found, 328.0318

#### 4. General procedure for the formal [3+2]-annulation to aza-bicyclo-[3,3,0]octanes (3-22)

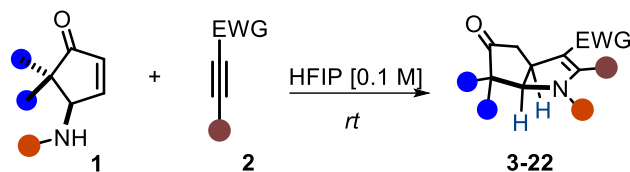

4-aminocyclopentenone **1** (1.0 equiv.) and alkyne **2** (1.2 equiv.) were taken in HFIP (0.1M) and stirred at room temperature. Progress of the reaction was monitored through TLC analysis and upon completion (ca. 12-16h), the crude was concentrated in vacuo. The residue was purified by silica-gel column chromatography to give the corresponding [3+2] annulation products **3-22**.

## 5. Characterization of [3+2] annulation products (3-22)

### **Diethyl-5-oxo-1,6,6-triphenyl-1,3a,4,5,6,6a-hexahydrocyclopenta[b]pyrrole-2,3-dicarboxylate (3)**

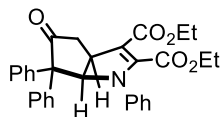

Title compound was prepared according to the general procedure using 4-aminocyclopentenone derivative **1a** (0.040g, 0.12 mmol, 1.0 equiv), diethyl acetylene dicarboxylate **2a** (0.025g, 0.14 mmol, 1.2 equiv) in presence of HFIP. The crude was then concentrated and purified by flash silica-gel column chromatography (8:2 Hexane/EtOAc) to give the desired products as semi-solid (red) in 94% (0.057 g) yield;  $R_f$  0.3 (EtOAc : Hexane 2:8);  $^1\text{H NMR}$  (400 MHz,  $\text{CDCl}_3$ )  $\delta$  7.34 - 7.28 (m, 5H), 6.92 - 6.83 (m, 8H), 6.56 (dd,  $J = 7.8, 1.7$  Hz, 2H), 5.83 (d,  $J = 10.3$  Hz, 1H), 4.28 - 4.12 (m, 3H), 4.06 - 3.97 (m, 2H), 2.95 (dd,  $J = 19.5, 10.4$  Hz, 1H), 2.60 (dd,  $J = 19.5, 4.2$  Hz, 1H), 1.23 (t,  $J = 7.1$  Hz, 3H), 0.99 (t,  $J = 7.1$  Hz, 3H);  $^{13}\text{C}\{^1\text{H}\}$  NMR (100 MHz,  $\text{CDCl}_3$ )  $\delta$  214.6, 164.5, 162.4, 153.2, 141.3, 140.0, 139.4, 131.1, 129.0, 128.5, 128.0 (2), 127.4, 126.9, 125.7, 124.5, 107.1, 75.5, 67.0, 62.0, 60.1, 42.0, 38.8, 14.4, 13.7; **HRMS(ESI-TOF)**  $m/z$ :  $[\text{M} + \text{Na}]^+\text{C}_{31}\text{H}_{29}\text{NNaO}_5$  calcd. 518.1943, found, 518.1938.

### **Diethyl-1-(4-isopropylphenyl)-5-oxo-6,6-diphenyl-1,3a,4,5,6,6a-hexahydrocyclopenta[b]pyrrole-2,3-dicarboxylate (4)**

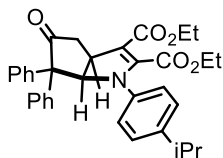

Title compound was prepared according to the general procedure using 4-aminocyclopentenone derivative **1b** (0.040g, 0.11 mmol, 1.0 equiv), Diethyl acetylene dicarboxylate **2a** (0.023g, 0.13 mmol, 1.2 equiv) in presence of HFIP. The crude was



then concentrated and purified by flash silica-gel column chromatography (8:2 Hexane/EtOAc) to give the desired products as semi-solid (colorless) in 79% (0.046 g) yield;  $R_f$  0.3 (EtOAc : Hexane 2:8);  $^1\text{H NMR}$  (400 MHz,  $\text{CDCl}_3$ )  $\delta$  7.33 - 7.27 (m, 5H), 6.89 - 6.84 (m, 5H), 6.72 (d,  $J = 8.4$  Hz, 2H), 6.45 (d,  $J = 8.4$  Hz, 2H), 5.78 (d,  $J = 10.2$  Hz, 1H), 4.26 - 4.12 (m, 3H), 4.08 - 3.94 (m, 2H), 2.94 (dd,  $J = 19.5, 10.4$  Hz, 1H), 2.68 (dt,  $J = 13.7, 6.8$  Hz, 1H), 2.57 (dd,  $J = 19.5, 4.4$  Hz, 1H), 1.22 (t,  $J = 7.1$  Hz, 3H), 1.09 (dd,  $J = 6.9, 2.7$  Hz, 6H), 0.94 (t,  $J = 7.1$  Hz, 3H);  $^{13}\text{C}\{^1\text{H}\}$  NMR (100 MHz,  $\text{CDCl}_3$ )  $\delta$  214.6, 164.5, 162.4, 153.5, 146.4, 140.2, 139.42, 138.9, 131.0, 128.9, 128.0, 127.9, 127.3, 126.8, 126.4, 124.6, 106.6, 75.8, 66.8, 61.8, 60.1, 42.1, 38.6, 33.6, 24.0, 23.9, 14.4, 13.6; HRMS(ESI-TOF)  $m/z$ :  $[\text{M} + \text{H}]^+\text{C}_{34}\text{H}_{36}\text{NO}_5$  calcd. 538.2593, found, 538.2594.

**Diethyl** **5-oxo-6,6-diphenyl-1-(*m*-tolyl)-1,3a,4,5,6,6a-hexahydrocyclopenta[*b*]pyrrole-2,3-dicarboxylate (5)**

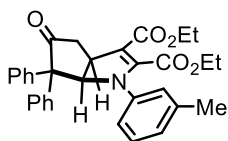

Title compound was prepared according to the general procedure using 4-aminocyclopentenone derivative **1c** (0.040g, 0.12 mmol, 1.0 equiv), diethyl acetylene dicarboxylate **2a** (0.025g, 0.14 mmol, 1.2 equiv) in presence of HFIP. The crude was then concentrated and purified by flash silica-gel column chromatography (8:2 Hexane/EtOAc) to give the desired products as semi-solid (colorless) in 68% (0.041g) yield;  $R_f$  0.3 (EtOAc : Hexane 2:8);  $^1\text{H NMR}$  (400 MHz,  $\text{CDCl}_3$ )  $\delta$  7.27 - 7.26 (m, 3H), 7.23 - 7.19 (m, 1H), 6.87 - 6.81 (m, 3H), 6.79 - 6.74 (m, 3H), 6.63 - 6.61 (m, 1H), 6.44 - 6.42 (m, 1H), 6.10 (s, 1H), 5.72 (d,  $J = 10.3$  Hz, 1H), 4.21 - 4.14 (m, 1H), 4.13 - 4.05 (m, 2H), 4.00 - 3.92 (m, 2H), 2.88 (dd,  $J = 19.5, 10.4$  Hz, 1H), 2.52 (dd,  $J = 19.5, 4.1$  Hz, 1H), 1.97 (s, 3H), 1.16 (t,  $J = 7.1$  Hz, 3H), 0.94 (t,  $J = 7.1$  Hz, 3H);  $^{13}\text{C}\{^1\text{H}\}$  NMR (100 MHz,  $\text{CDCl}_3$ )  $\delta$  214.8, 164.5, 162.4, 153.3, 141.1, 140.1, 139.4, 138.2, 131.0, 129.0, 128.3, 128.0, 127.9, 127.2, 126.7, 126.6, 125.7, 121.2, 106.7, 75.7, 67.0, 61.9, 60.0, 42.0, 38.8, 21.0, 14.4, 13.7; HRMS(ESI-TOF)  $m/z$ :  $[\text{M} + \text{H}]^+\text{C}_{32}\text{H}_{32}\text{NO}_5$  calcd. 510.2280, found, 510.2272.

**Diethyl**

**1-(4-chlorophenyl)-5-oxo-6,6-diphenyl-1,3a,4,5,6,6a-hexahydrocyclopenta[b]pyrrole-2,3-dicarboxylate (6)**

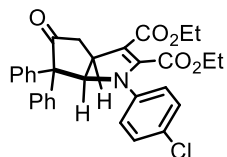

Title compound was prepared according to the general procedure using 4-aminocyclopentenone derivative **1d** (0.050g, 0.14 mmol, 1.0 equiv), diethyl acetylene dicarboxylate **2a** (0.029g, 0.17 mmol, 1.2 equiv) in presence of HFIP. The crude was then concentrated and purified by flash silica-gel column chromatography (8:2 Hexane/EtOAc) to give the desired products as semi-solid (yellow) in 72% (0.053g) yield;  $R_f$  0.25 (EtOAc : Hexane 2:8);  $^1\text{H NMR}$  (400 MHz,  $\text{CDCl}_3$ )  $\delta$  7.36 - 7.29 (m, 5H), 7.00 - 6.83 (m, 7H), 6.51 - 6.48 (m, 2H), 5.74 (d,  $J = 10.2$  Hz, 1H), 4.27 - 4.12 (m, 3H), 4.04 (qd,  $J = 7.1, 1.0$  Hz, 2H), 2.94 (dd,  $J = 19.5, 10.5$  Hz, 1H), 2.57 (dd,  $J = 19.5, 4.2$  Hz, 1H), 1.23 (t,  $J = 7.1$  Hz, 3H), 1.05 (t,  $J = 7.1$  Hz, 3H);  $^{13}\text{C}\{^1\text{H}\}$  NMR (100 MHz,  $\text{CDCl}_3$ )  $\delta$  214.2, 164.3, 162.2, 152.6, 140.1, 139.8, 139.5, 131.2, 131.1, 129.1, 128.6, 128.1, 128.0, 127.5, 127.0, 125.9, 107.9, 75.8, 66.9, 62.2, 60.2, 41.9, 38.8, 14.4, 13.8; HRMS(ESI-TOF)  $m/z$ :  $[\text{M} + \text{H}]^+ \text{C}_{31}\text{H}_{29}\text{ClNO}_5$  calcd. 530.1734, found, 530.1721.

**Diethyl**

**1-(4-chlorophenyl)-6,6-bis(4-fluorophenyl)-5-oxo-1,3a,4,5,6,6a-hexahydrocyclopenta[b]pyrrole-2,3-dicarboxylate (7)**

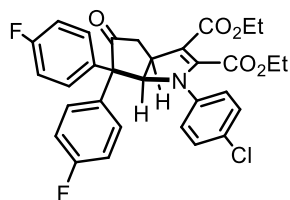

Title compound was prepared according to the general procedure using 4-aminocyclopentenone derivative **1e** (0.040g, 0.10 mmol, 1.0 equiv), diethyl acetylene dicarboxylate **2a** (0.021g, 0.12 mmol, 1.2 equiv) in presence of HFIP. The crude was then concentrated and purified by flash silica-gel column chromatography(8:2

Hexane/EtOAc) to give the desired products as semi-solid (colorless) in 65% (0.037 g) yield;  $R_f$  0.3 (EtOAc : Hexane 1:9);  $^1\text{H NMR}$  (800 MHz,  $\text{CDCl}_3$ )  $\delta$  7.28 (dd,  $J = 8.6, 5.0$  Hz, 2H), 7.04 (t,  $J = 8.4$  Hz, 2H), 6.94 (d,  $J = 8.7$  Hz, 2H), 6.79 (dd,  $J = 8.3, 5.3$  Hz, 2H), 6.63 (t,  $J = 8.5$  Hz, 2H), 6.52 (d,  $J = 8.7$  Hz, 2H), 5.67 (d,  $J = 10.2$  Hz, 1H), 4.23 - 4.14 (m, 3H), 4.07 - 4.01 (m, 2H), 2.93 (dd,  $J = 19.7, 10.5$  Hz, 1H), 2.56 (dd,  $J = 19.7, 4.1$  Hz, 1H), 1.23 (t,  $J = 7.1$  Hz, 3H), 1.05 (t,  $J = 7.1$  Hz, 3H);  $^{13}\text{C}\{^1\text{H}\}$  NMR (200 MHz,  $\text{CDCl}_3$ )  $\delta$  213.8, 164.2, 163.1, 162.5, 162.1, 161.8, 161.2, 152.5, 139.9, 135.5, 135.4, 135.1(2), 132.7, 132.6, 131.6, 129.7(2), 128.8, 125.8, 116.2, 116.1, 114.5, 114.4, 108.0, 75.8, 65.7, 62.3, 60.4, 41.7, 38.6, 14.4, 13.8; **HRMS(ESI-TOF)**  $m/z$ :  $[\text{M} + \text{Na}]^+\text{C}_{31}\text{H}_{26}\text{ClF}_2\text{NNaO}_5$  calcd. 588.1365, found, 588.1349.

**Diethyl 1-(4-chlorophenyl)-5-oxo-6,6-di-p-tolyl-1,3a,4,5,6,6a-hexahydrocyclopenta[b]pyrrole-2,3-dicarboxylate (8)**

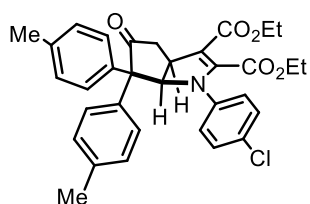

Title compound was prepared according to the general procedure using 4-aminocyclopentenone derivative **1f** (0.040g, 0.10 mmol, 1.0 equiv), diethyl acetylene dicarboxylate **2a** (0.021g, 0.12 mmol, 1.2 equiv) in presence of HFIP. The crude was then concentrated and purified by flash silica-gel column chromatography (8:2 Hexane/EtOAc) to give the desired products as oil in 81% (0.044 g) yield;  $R_f$  0.25 (EtOAc : Hexane 1:9);  $^1\text{H NMR}$  (400 MHz,  $\text{CDCl}_3$ )  $\delta$  7.22 - 7.20 (m, 2H), 7.15 - 7.13 (m, 2H), 6.86 (d,  $J = 8.7$  Hz, 2H), 6.72 - 6.68 (m, 4H), 6.50 (d,  $J = 8.7$  Hz, 2H), 5.70 (d,  $J = 10.2$  Hz, 1H), 4.22 - 4.12 (m, 3H), 4.04 (q,  $J = 7.1$  Hz, 2H), 2.94 (dd,  $J = 19.5, 10.5$  Hz, 1H), 2.51 (dd,  $J = 19.5, 4.4$  Hz, 1H), 2.32 (s, 3H), 2.15 (s, 3H), 1.23 (t,  $J = 7.1$  Hz, 3H), 1.05 (t,  $J = 7.1$  Hz, 3H);  $^{13}\text{C}\{^1\text{H}\}$  NMR (100 MHz,  $\text{CDCl}_3$ )  $\delta$  214.3, 164.4, 162.3, 152.5, 140.0, 137.9, 136.9, 136.8, 136.4, 131.0, 130.9, 129.7, 128.3, 128.2, 127.8, 126.0, 107.8, 76.0, 66.3, 62.2, 60.2, 41.9, 38.5, 21.1, 20.9, 14.4, 13.8; **HRMS(ESI-TOF)**  $m/z$ :  $[\text{M} + \text{Na}]^+\text{C}_{33}\text{H}_{32}\text{ClNNaO}_5$  calcd. 580.1867, found, 580.1867.

**Diethyl 1-(4-chlorophenyl)-6-(4-methoxyphenyl)-5-oxo-6-phenyl-1,3a,4,5,6,6a-hexahydrocyclopenta[b]pyrrole-2,3-dicarboxylate (9)**

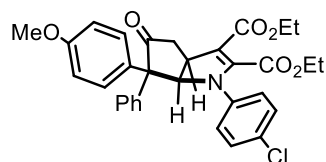

Title compound was prepared according to the general procedure using 4-aminocyclopentenone derivative **1g** (0.040g, 0.10 mmol, 1.0 equiv), diethyl acetylene dicarboxylate **2a** (0.021g, 0.12 mmol, 1.2 equiv) in presence of HFIP. The crude was then concentrated and purified by flash silica-gel column chromatography (8:2 Hexane/EtOAc) to give the desired products as a colorless sticky solid in 64% (0.037 g) yield and isolated as inseparable mixture of diastereomer (1:1);  $R_f$  0.3 (EtOAc : Hexane 2:8);  **$^1\text{H NMR}$**  (400 MHz,  $\text{CDCl}_3$ )  $\delta$  7.27 (s, 1H), 7.19 - 7.15 (m, 3H), 6.90 - 6.76 (m, 11H), 6.66 (d,  $J = 8.8$  Hz, 2H), 6.48 - 6.35 (m, 5H), 5.63 (dd,  $J = 19.1, 10.2$  Hz, 2H), 4.18 - 4.05 (m, 6H), 4.01 - 3.94 (m, 4H), 3.72 (s, 3H), 3.59 (s, 2H), 2.87 (td,  $J = 19.5, 9.5$  Hz, 2H), 2.47 (dt,  $J = 19.5, 4.7$  Hz, 2H), 1.16 - 1.15 (m, 6H), 0.98 (td,  $J = 7.1, 3.8$  Hz, 6H);  **$^{13}\text{C}\{^1\text{H}\}$  NMR** (100 MHz,  $\text{CDCl}_3$ )  $\delta$  214.4, 214.3, 164.4, 162.3(2), 159.3, 158.6, 152.6, 152.5, 140.1, 140.0, 139.6, 132.1, 131.6(2), 131.2, 131.1, 131.0, 129.2, 129.1, 128.6, 128.5, 128.1, 127.9, 127.5, 127.0, 125.9(2), 114.4, 113.0, 107.9, 107.8, 76.2 (2), 66.3, 66.2, 62.2(2), 60.2, 55.4, 55.3, 41.9(2), 38.7, 38.5, 14.4, 13.8; **HRMS(ESI-TOF)**  $m/z$ :  $[\text{M} + \text{Na}]^+\text{C}_{32}\text{H}_{30}\text{ClNNaO}_6$  calcd. 582.1659, found, 582.1658.

**Diethyl**

**5-oxo-1,6-diphenyl-6-(thiophen-2-yl)-1,3a,4,5,6,6a-**

**hexahydrocyclopenta[b]pyrrole-2,3-dicarboxylate (10)**

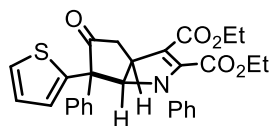

Title compound was prepared according to the general procedure using 4-aminocyclopentenone derivative **1h** (0.030g, 0.09 mmol, 1.0 equiv), diethyl acetylene dicarboxylate **2a** (0.019g, 0.11 mmol, 1.2 equiv) in presence of HFIP. The crude was then concentrated and purified by flash silica-gel column chromatography (8:2 Hexane/EtOAc) to give the desired products as a colorless semi-solid in 53% (0.024g) yield and isolated as inseparable mixture of diastereomer (2:1);  $R_f$  0.3 (EtOAc : Hexane 2:8);  **$^1\text{H NMR}$**  (400 MHz,  $\text{CDCl}_3$ )  $\delta$  7.39 - 7.30 (m, 3H), 7.03 - 7.00 (m, 2.73H), 6.98 - 6.89 (m, 6.49H), 6.87 - 6.85 (m, 2H), 6.77 (d,  $J = 7.3$  Hz, 0.73H), 6.56 - 6.52 (m, 2.52H), 5.80 - 5.77 (m, 1.26H), 4.29 - 4.11 (m, 4.38H), 4.07 - 4.00 (m, 2.52H), 3.12 (dd,  $J = 19.7, 10.1$  Hz, 1H), 2.92 (dd,  $J = 19.2, 10.6$  Hz, 0.46H), 2.75 (dd,  $J = 19.5, 4.4$  Hz, 1H), 2.55 (dd,  $J = 19.4, 3.8$  Hz, 0.44H), 1.26 - 1.22 (m, 6.27H), 1.04 - 0.99 (m, 3.55H);  **$^{13}\text{C}\{^1\text{H}\}$  NMR** (100 MHz,  $\text{CDCl}_3$ )  $\delta$  214.2, 212.4, 164.5, 164.4, 162.4, 162.3, 153.5, 152.6, 143.7, 140.9, 139.1, 130.4, 130.3, 129.6, 129.2, 128.6, 128.4, 127.5(2), 127.4, 127.1, 126.2, 126.1(2), 125.6(2), 124.9, 123.9, 107.3, 107.1, 75.9, 65.0, 63.8, 62.1, 62.0, 60.2, 42.1, 41.2, 39.4, 38.4, 29.8(2), 14.5(2), 13.8; **HRMS(ESI-TOF)**  $m/z$ :  $[\text{M} + \text{Na}]^+$   $\text{C}_{29}\text{H}_{27}\text{NNaO}_5$   $\text{Scalc}$ . 524.1508, found, 524.1506.

**Diethyl**

**(3a*S*,6*S*,6a*R*)-6-methyl-5-oxo-1,6-diphenyl-1,3a,4,5,6,6a-**

**hexahydrocyclopenta[b]pyrrole-2,3-dicarboxylate (11)**

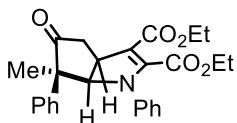

Title compound was prepared according to the general procedure using 4-aminocyclopentenone derivative **1i** (0.040g, 0.15 mmol, 1.0 equiv), diethyl acetylene

dicarboxylate **2a** (0.031g, 0.18 mmol, 1.2 equiv) in presence of HFIP. The crude was then concentrated and purified by flash silica-gel column chromatography (8:2 Hexane/EtOAc) to give the desired products as colorless semi-solid in 96% (0.063g) yield (single diastereomer);  $R_f$  0.25 (EtOAc : Hexane 2:8);  $^1\text{H NMR}$  (400 MHz,  $\text{CDCl}_3$ )  $\delta$  7.04 - 7.02 (m, 3H), 6.97 - 6.87 (m, 5H), 6.44 (d,  $J = 7.1$  Hz, 2H), 5.03 (d,  $J = 11.1$  Hz, 1H), 4.23 - 4.10 (m, 3H), 4.06 (q,  $J = 7.1$  Hz, 2H), 3.16 (dd,  $J = 20.0, 9.7$  Hz, 1H), 2.86 (dd,  $J = 20.0, 5.6$  Hz, 1H), 1.54 (s, 3H), 1.24 (t,  $J = 7.1$  Hz, 3H), 1.04 (t,  $J = 7.1$  Hz, 3H);  $^{13}\text{C}\{^1\text{H}\}$  NMR (100 MHz,  $\text{CDCl}_3$ )  $\delta$  219.9, 164.7, 162.4, 151.9, 140.6, 138.3, 128.6, 128.4, 127.8, 127.1, 125.2, 123.1, 106.7, 77.6, 62.0, 59.9, 58.0, 43.2, 38.8, 24.7, 14.4, 13.7; HRMS(ESI-TOF)  $m/z$ :  $[\text{M} + \text{Na}]^+$   $\text{C}_{26}\text{H}_{27}\text{NNaO}_5$  calcd. 456.1787, found, 456.1780.

**Diethyl (3a*S*,6*R*,6*aR*)-6-methyl-5-oxo-1,6-diphenyl-1,3a,4,5,6,6a-hexahydrocyclopenta[*b*]pyrrole-2,3-dicarboxylate (12)**

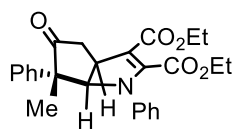

Title compound was prepared according to the general procedure using 4-aminocyclopentenone derivative **1j** (0.040g, 0.15 mmol, 1.0 equiv), diethyl acetylene dicarboxylate **2a** (0.031g, 0.18 mmol, 1.2 equiv) in presence of HFIP. The crude was then concentrated and purified by flash silica-gel column chromatography (8:2 Hexane/EtOAc) to give the desired products as white powder in 82% (0.054g) yield (single diastereomer);  $R_f$  0.3 (EtOAc : Hexane 2:8);  $^1\text{H NMR}$  (400 MHz,  $\text{CDCl}_3$ )  $\delta$  7.30 - 7.26 (m, 2H), 7.23 - 7.16 (m, 3H), 7.08 - 7.03 (m, 3H), 6.97 (d,  $J = 7.7$  Hz, 2H), 5.28 (d,  $J = 10.6$  Hz, 1H), 4.21 - 4.00 (m, 5H), 2.93 (dd,  $J = 19.7, 10.1$  Hz, 1H), 2.76 (dd,  $J = 19.7, 4.8$  Hz, 1H), 1.31 (s, 3H), 1.20 (t,  $J = 7.1$  Hz, 3H), 1.13 (t,  $J = 7.1$  Hz, 3H);  $^{13}\text{C}\{^1\text{H}\}$  NMR (100 MHz,  $\text{CDCl}_3$ )  $\delta$  218.1, 164.4, 162.7, 151.0, 142.7, 141.8, 129.4, 129.1, 127.4, 126.1, 125.5, 122.2, 108.7, 76.7, 62.3, 60.1, 58.8, 41.8, 39.2, 19.9, 14.4, 13.8; HRMS(ESI-TOF)  $m/z$ :  $[\text{M} + \text{Na}]^+$   $\text{C}_{26}\text{H}_{27}\text{NNaO}_5$  calcd. 456.1787, found, 456.1790.

**Diethyl 6,6-diethyl-5-oxo-1-phenyl-1,3a,4,5,6,6a-hexahydrocyclopenta[b]pyrrole-2,3-dicarboxylate (13)**

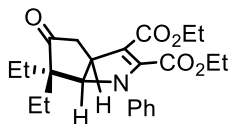

Title compound was prepared according to the general procedure using 4-aminocyclopentenone derivative **1k** (0.040g, 0.17 mmol, 1.0 equiv), diethyl acetylene dicarboxylate **2a** (0.036g, 0.20 mmol, 1.2 equiv) in presence of HFIP. The crude was then concentrated and purified by flash silica-gel column chromatography (8:2 Hexane/EtOAc) to give the desired products as white semi-solid in 79% (0.055g) yield;  $R_f$  0.3 (EtOAc : Hexane 2:8);  $^1\text{H NMR}$  (400 MHz,  $\text{CDCl}_3$ )  $\delta$  7.33 - 7.29 (m, 2H), 7.21 - 7.16 (m, 3H), 4.90 (d,  $J = 11.4$  Hz, 1H), 4.19 - 4.08 (m, 4H), 3.97 - 3.90 (m, 1H), 2.80 (dd,  $J = 19.3, 9.9$  Hz, 1H), 2.52 (dd,  $J = 19.3, 6.6$  Hz, 1H), 1.64 (ddd,  $J = 27.6, 14.5, 7.4$  Hz, 2H), 1.40 (dt,  $J = 14.6, 7.4$  Hz, 1H), 1.33 - 1.25 (m, 1H), 1.21 (t,  $J = 7.1$  Hz, 3H), 1.08 (t,  $J = 7.1$  Hz, 3H), 0.69 (t,  $J = 7.4$  Hz, 3H), 0.54 (t,  $J = 7.5$  Hz, 3H);  $^{13}\text{C}\{^1\text{H}\}$  NMR (100 MHz,  $\text{CDCl}_3$ )  $\delta$  219.0, 164.7, 162.7, 152.5, 142.0, 129.5, 126.6, 124.5, 107.7, 73.3, 62.1, 59.9, 57.9, 42.7, 38.4, 27.0, 23.5, 14.4, 13.8, 8.3, 8.0; **HRMS(ESI-TOF)**  $m/z$ :  $[\text{M} + \text{Na}]^+$   $\text{C}_{23}\text{H}_{29}\text{NNaO}_5$  calcd. 422.1943, found, 422.1942.

**Dimethyl 5-oxo-1,6,6-triphenyl-1,3a,4,5,6,6a-hexahydrocyclopenta[b]pyrrole-2,3-dicarboxylate (14)**

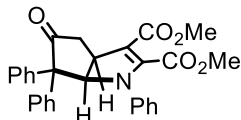

Title compound was prepared according to the general procedure using 4-aminocyclopentenone derivative **1a** (0.040g, 0.12 mmol, 1.0 equiv), dimethyl acetylene dicarboxylate **2b** (0.021g, 0.14 mmol, 1.2 equiv) in presence of HFIP. The crude was then concentrated and purified by flash silica-gel column chromatography (8:2 Hexane/EtOAc) to give the desired products as a white sticky solid in 94% (0.054g)

yield;  $R_f$  0.3 (EtOAc : Hexane 2:8);  $^1\text{H NMR}$  (400 MHz,  $\text{CDCl}_3$ )  $\delta$  7.34 - 7.29 (m, 5H), 6.93 - 6.86 (m, 6H), 6.83 - 6.81 (m, 2H), 6.55 - 6.53 (m, 2H), 5.86 (d,  $J = 10.4$  Hz, 1H), 4.25 (td,  $J = 10.4, 4.1$  Hz, 1H), 3.70 (s, 3H), 3.58 (s, 3H), 2.94 (dd,  $J = 19.4, 10.4$  Hz, 1H), 2.58 (dd,  $J = 19.4, 4.1$  Hz, 1H);  $^{13}\text{C}\{^1\text{H}\}$  NMR (100 MHz,  $\text{CDCl}_3$ )  $\delta$  214.5, 164.9, 162.9, 153.3, 141.1, 139.9, 139.3, 131.0, 129.0, 128.6, 128.0, 127.4, 126.9, 125.6, 124.0, 107.0, 75.3, 67.0, 52.8, 51.5, 42.0, 38.7; **HRMS(ESI-TOF)**  $m/z$ :  $[\text{M} + \text{Na}]^+\text{C}_{29}\text{H}_{25}\text{NNaO}_5$  calcd. 490.1630, found, 490.1625.

### **2-Benzoyl-1,6,6-triphenyl-3a,4,6,6a-tetrahydrocyclopenta[b]pyrrol-5(1H)-one (15)**

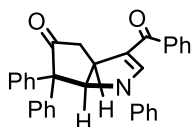

Title compound was prepared according to the general procedure using 4-aminocyclopentenone derivative **1a** (0.040g, 0.12 mmol, 1.0 equiv), alkyne derivative **2c** (0.020g, 0.14 mmol, 1.2 equiv) in presence of HFIP. The crude was then concentrated and purified by flash silica-gel column chromatography (8:2 Hexane/EtOAc) to give the desired products as a colorless liquid in 73% (0.041g) yield;  $R_f$  0.3 (EtOAc : Hexane 2:8);  $^1\text{H NMR}$  (800 MHz,  $\text{CDCl}_3$ )  $\delta$  7.62 (d,  $J = 4.2$  Hz, 2H), 7.55 - 7.42 (m, 9H), 6.99 - 6.96 (m, 5H), 6.88 - 6.83 (m, 3H), 6.57 (d,  $J = 5.3$  Hz, 2H), 6.06 (d,  $J = 9.2$  Hz, 1H), 4.49 (s, 1H), 3.12 - 3.09 (m, 1H), 2.92 (d,  $J = 19.2$  Hz, 1H);  $^{13}\text{C}\{^1\text{H}\}$  NMR (200 MHz,  $\text{CDCl}_3$ )  $\delta$  215.4, 190.1, 150.4, 141.1, 140.5, 139.6, 138.9, 131.4, 131.0, 129.2, 128.9, 128.5, 128.2, 128.1(2), 127.2, 127.1, 123.0, 120.3, 117.6, 70.7, 67.5, 41.0, 39.9; **HRMS(ESI-TOF)**  $m/z$ :  $[\text{M} + \text{H}]^+\text{C}_{32}\text{H}_{26}\text{NO}_2$  calcd. 456.1964, found, 456.1960.



**2-(4-Methylbenzoyl)-1,6,6-triphenyl-3a,4,6,6a-tetrahydrocyclopenta[b]pyrrol-5(1H)-one (16)**

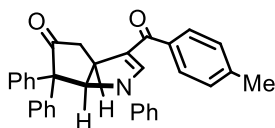

Title compound was prepared according to the general procedure using 4-aminocyclopentenone derivative **1a** (0.040g, 0.12 mmol, 1.0 equiv), alkyne derivative **2d** (0.022g, 0.14 mmol, 1.2 equiv) in presence of HFIP. The crude was then concentrated and purified by flash silica-gel column chromatography (8:2 Hexane/EtOAc) to give the desired products as a colorless liquid in 38% (0.022g) yield;  $R_f$  0.25 (EtOAc : Hexane 2:8);  $^1\text{H NMR}$  (400 MHz,  $\text{CDCl}_3$ )  $\delta$  7.51 - 7.47 (m, 4H), 7.45 - 7.39 (m, 3H), 7.24 - 7.21 (m, 3H), 6.96 - 6.89 (m, 5H), 6.84 - 6.81 (m, 2H), 6.77 (t,  $J = 7.4$  Hz, 1H), 6.52 (d,  $J = 7.8$  Hz, 2H), 5.99 (d,  $J = 10.2$  Hz, 1H), 4.44 (td,  $J = 10.0, 1.8$  Hz, 1H), 3.05 (dd,  $J = 19.2, 10.0$  Hz, 1H), 2.86 (dd,  $J = 19.2, 2.5$  Hz, 1H), 2.40 (s, 3H);  $^{13}\text{C}\{^1\text{H}\}$  NMR (100 MHz,  $\text{CDCl}_3$ )  $\delta$  215.5, 190.0, 149.9, 141.5, 141.2, 139.7, 139.0, 137.8, 131.5, 130.2, 129.9, 129.2, 128.9, 128.2(2), 127.2, 127.1, 122.9, 120.4, 117.5, 70.7, 67.6, 41.0, 40.1, 21.6; **HRMS(ESI-TOF)**  $m/z$ :  $[\text{M} + \text{H}]^+$   $\text{C}_{33}\text{H}_{28}\text{NO}_2$  calcd. 470.2120, found, 470.2116.

**2-(2-methylbenzoyl)-1,6,6-triphenyl-3a,4,6,6a-tetrahydrocyclopenta[b]pyrrol-5(1H)-one (17)**

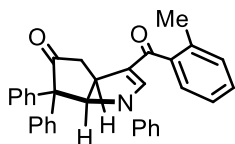

Title compound was prepared according to the general procedure using 4-aminocyclopentenone derivative **1a** (0.040g, 0.12 mmol, 1.0 equiv), alkyne derivative **2e** (0.022g, 0.14 mmol, 1.2 equiv) in presence of HFIP. The crude was then concentrated and purified by flash silica-gel column chromatography (8:2 Hexane/EtOAc) to give the desired products as a colorless liquid in 63% (0.036g) yield;  $R_f$  0.25 (EtOAc : Hexane 2:8);  $^1\text{H NMR}$  (400 MHz,  $\text{CDCl}_3$ )  $\delta$  7.51 - 7.49 (m, 2H), 7.45 - 7.38 (m, 3H), 7.32 - 7.28

(m, 1H), 7.24 - 7.19 (m, 3H), 6.95 (s, 1H), 6.92 - 6.84 (m, 5H), 6.79 - 6.74 (m, 3H), 6.47 (d,  $J = 7.9$  Hz, 2H), 6.05 (d,  $J = 10.3$  Hz, 1H), 4.43 (td,  $J = 10.2, 2.2$  Hz, 1H), 3.07 (dd,  $J = 19.2, 10.2$  Hz, 1H), 2.88 (dd,  $J = 19.1, 2.5$  Hz, 1H), 2.37 (s, 3H);  $^{13}\text{C}\{^1\text{H}\}$  NMR (100 MHz,  $\text{CDCl}_3$ )  $\delta$  215.2, 192.1, 151.3, 141.0, 140.4, 139.6, 138.8, 135.7, 131.5, 131.0, 129.3, 129.2, 128.8, 128.3, 128.1, 127.3, 127.1, 125.3, 123.1, 121.7, 117.9, 71.0, 67.5, 41.1, 38.9, 19.7; **HRMS(ESI-TOF)**  $m/z$ :  $[\text{M} + \text{H}]^+\text{C}_{33}\text{H}_{28}\text{NO}_2$  calcd. 470.2120, found, 470.2113.

**2-(4-methoxybenzoyl)-1,6,6-triphenyl-3a,4,6,6a-tetrahydrocyclopenta[b]pyrrol-5(1H)-one (18)**

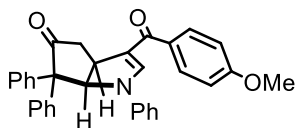

Title compound was prepared according to the general procedure using 4-aminocyclopentenone derivative **1a** (0.050g, 0.15 mmol, 1.0 equiv), alkyne derivative **2f** (0.030g, 0.18 mmol, 1.2 equiv) in presence of HFIP. The crude was then concentrated and purified by flash silica-gel column chromatography (8:2 Hexane/EtOAc) to give the desired products as a colorless liquid in 48% (0.036g) yield;  $R_f$  0.25 (EtOAc : Hexane 2:8);  $^1\text{H}$  NMR (400 MHz,  $\text{CDCl}_3$ )  $\delta$  7.58 - 7.56 (m, 2H), 7.51 - 7.49 (m, 2H), 7.44 - 7.37 (m, 3H), 7.21 (s, 1H), 6.97 - 6.90 (m, 7H), 6.85 - 6.82 (m, 2H), 6.78 (t,  $J = 7.4$  Hz, 1H), 6.52 (d,  $J = 7.9$  Hz, 2H), 5.98 (d,  $J = 10.2$  Hz, 1H), 4.44 (td,  $J = 10.0, 1.9$  Hz, 1H), 3.86 (s, 3H), 3.05 (dd,  $J = 19.2, 10.0$  Hz, 1H), 2.85 (dd,  $J = 19.2, 2.5$  Hz, 1H);  $^{13}\text{C}\{^1\text{H}\}$  NMR (100 MHz,  $\text{CDCl}_3$ )  $\delta$  215.5, 162.1, 149.3, 141.3, 139.7, 139.0, 133.1, 131.4, 130.1, 129.2, 128.9, 128.2(2), 127.2, 127.1, 122.8, 120.3, 117.4, 113.7, 70.6, 67.5, 55.6, 41.0, 40.3; **HRMS(ESI-TOF)**  $m/z$ :  $[\text{M} + \text{H}]^+\text{C}_{33}\text{H}_{28}\text{NO}_3$  calcd. 486.2069, found, 486.2058.

**2-(4-Chlorobenzoyl)-1,6,6-triphenyl-3a,4,6,6a-tetrahydrocyclopenta[b]pyrrol-5(1H)-one (19)**

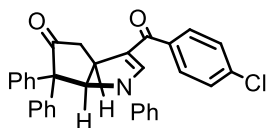

Title compound was prepared according to the general procedure using 4-aminocyclopentenone derivative **1a** (0.040g, 0.12 mmol, 1 equiv), alkyne derivative **2g** (0.025g, 0.14 mmol, 1.2 equiv) in presence of HFIP. The crude was then concentrated and purified by flash silica-gel column chromatography (8:2 Hexane/EtOAc) to give the desired products as a colorless liquid in 58% (0.035g) yield;  $R_f$  0.25 (EtOAc : Hexane 2:8);  $^1\text{H NMR}$  (400 MHz,  $\text{CDCl}_3$ )  $\delta$  7.52 - 7.48 (m, 4H), 7.45 - 7.38 (m, 5H), 7.17 (s, 1H), 6.97 - 6.89 (m, 5H), 6.83 - 6.78 (m, 3H), 6.52 (d,  $J = 7.8$  Hz, 2H), 6.01 (d,  $J = 10.2$  Hz, 1H), 4.43 (td,  $J = 10.2, 2.0$  Hz, 1H), 3.05 (dd,  $J = 19.2, 10.0$  Hz, 1H), 2.85 (dd,  $J = 19.2, 2.5$  Hz, 1H);  $^{13}\text{C}\{^1\text{H}\}$  NMR (100 MHz,  $\text{CDCl}_3$ )  $\delta$  215.2, 188.6, 150.4, 141.0, 139.6, 138.9, 138.8, 137.1, 131.4, 129.5, 129.2, 129.0, 128.8, 128.2, 128.1, 127.3, 127.2, 123.2, 120.2, 117.7, 70.9, 67.5, 40.9, 39.9; HRMS(ESI-TOF)  $m/z$ :  $[\text{M} + \text{H}]^+$   $\text{C}_{32}\text{H}_{25}\text{ClNO}_2$  calcd. 490.1574, found, 490.1560.

**2-(1-Naphthoyl)-1,6,6-triphenyl-3a,4,6,6a-tetrahydrocyclopenta[b]pyrrol-5(1H)-one (20)**

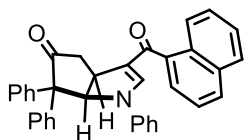

Title compound was prepared according to the general procedure using 4-aminocyclopentenone derivative **1a** (0.050g, 0.15 mmol, 1.0 equiv), alkyne derivative **2h** (0.034g, 0.18 mmol, 1.2 equiv) in presence of HFIP. The crude was then concentrated and purified by flash silica-gel column chromatography (8:2 Hexane/EtOAc) to give the desired products as a colorless liquid in 57% (0.044g) yield;  $R_f$  0.25 (EtOAc : Hexane

2:8); **<sup>1</sup>H NMR** (400 MHz, CDCl<sub>3</sub>) δ 8.14 - 8.12 (m, 1H), 7.92 - 7.87 (m, 2H), 7.57 - 7.50 (m, 4H), 7.47 - 7.39 (m, 5H), 7.01 (s, 1H), 6.89 - 6.83 (m, 5H), 6.81 - 6.78 (m, 2H), 6.74 (t, *J* = 7.4 Hz, 1H), 6.43 (d, *J* = 7.8 Hz, 2H), 6.09 (d, *J* = 10.3 Hz, 1H), 4.54 (td, *J* = 10.0, 2.5 Hz, 1H), 3.15 (dd, *J* = 19.1, 9.9 Hz, 1H), 3.03 (dd, *J* = 19.1, 2.7 Hz, 1H); **<sup>13</sup>C{<sup>1</sup>H} NMR** (100 MHz, CDCl<sub>3</sub>) δ 215.2, 191.3, 151.6, 140.8, 139.6, 138.7, 138.4, 133.9, 131.4, 130.7, 130.0, 129.2, 128.7, 128.3, 128.2, 128.1, 127.1, 127.0, 126.5, 125.7, 125.4, 124.6, 123.2, 122.3, 117.9, 71.1, 67.5, 41.1, 39.1; **HRMS(ESI-TOF)** *m/z*: [M + H]<sup>+</sup>C<sub>36</sub>H<sub>28</sub>NO<sub>2</sub>calcd. 506.2120, found, 506.2111.

**2-(Cyclohexanecarbonyl)-1,6,6-triphenyl-3a,4,6,6a-tetrahydrocyclopenta[b]pyrrol-5(1H)-one (21)**

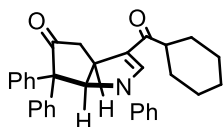

Title compound was prepared according to the general procedure using 4-aminocyclopentenone derivative **1a** (0.050g, 0.15 mmol, 1.0 equiv), alkyne derivative **2i** (0.026g, 0.18 mmol, 1.2 equiv) in presence of HFIP. The crude was then concentrated and purified by flash silica-gel column chromatography (9:1 Hexane/EtOAc) to give the desired products as a colorless liquid in 35% (0.025g) yield; *R<sub>f</sub>* 0.25 (EtOAc : Hexane 1:9); **<sup>1</sup>H NMR** (400 MHz, CDCl<sub>3</sub>) δ 7.49 - 7.47 (m, 2H), 7.43 - 7.36 (m, 5H), 6.97 - 6.93 (m, 2H), 6.87 - 6.85 (m, 2H), 6.79 - 6.74(m, 3H), 6.57 (d, *J* = 7.8 Hz, 2H), 5.91 (d, *J* = 10.3 Hz, 1H), 4.21 (td, *J* = 10.4, 2.5 Hz, 1H), 2.95 (dd, *J* = 19.2, 10.4 Hz, 1H), 2.66 (tt, *J* = 11.5, 3.3 Hz, 1H), 2.58 (dd, *J* = 19.2, 2.8 Hz, 1H), 1.86 - 1.77 (m, 2H), 1.73 - 1.67 (m, 3H), 1.55 - 1.49 (m, 2H), 1.31 - 1.26 (m, 3H); **<sup>13</sup>C{<sup>1</sup>H} NMR** (100 MHz, CDCl<sub>3</sub>) δ 215.3, 198.7, 146.7, 141.7, 139.5, 139.0, 131.5, 129.1, 128.7, 128.2, 128.1, 127.1, 122.7, 120.2, 117.9, 70.3, 67.5, 46.6, 41.4, 38.9, 30.3, 30.0, 26.2, 26.0(2); **HRMS(ESI-TOF)** *m/z*: [M + H]<sup>+</sup>C<sub>32</sub>H<sub>32</sub>NO<sub>2</sub>calcd. 462.2433, found, 462.2425.

**1,6,6-Triphenyl-2-(phenylsulfonyl)-3a,4,6,6a-tetrahydrocyclopenta[b]pyrrol-5(1H)-one (22)**

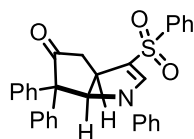

Title compound was prepared according to the general procedure using 4-aminocyclopentenone derivative **1a** (0.040g, 0.12 mmol, 1.0 equiv), alkyne derivative **2j** (0.025g, 0.14 mmol, 1.2 equiv) in presence of HFIP. The crude was then concentrated and purified by flash silica-gel column chromatography (8:2 Hexane/EtOAc) to give the desired products as a colorless liquid in 68% (0.041g) yield;  $R_f$  0.4 (EtOAc : Hexane 2:8);  $^1\text{H NMR}$  (400 MHz,  $\text{CDCl}_3$ )  $\delta$  7.90 - 7.88 (m, 2H), 7.62 - 7.59 (m, 1H), 7.56 - 7.53 (m, 2H), 7.44 (s, 1H), 7.42 - 7.34 (m, 5H), 6.93 (t,  $J = 7.9$  Hz, 2H), 6.88 - 6.81 (m, 3H), 6.76 (t,  $J = 7.4$  Hz, 1H), 6.70 - 6.68 (m, 2H), 6.50 (d,  $J = 7.8$  Hz, 2H), 5.98 (d,  $J = 10.3$  Hz, 1H), 4.04 - 3.98 (m, 1H), 2.71 - 2.69 (m, 2H);  $^{13}\text{C}\{^1\text{H}\}$  NMR (101 MHz,  $\text{CDCl}_3$ )  $\delta$  213.8, 148.2, 142.0, 141.1, 138.9, 138.4, 133.0, 131.4, 129.4, 129.2, 128.8, 128.3, 128.0, 127.2, 127.1, 122.9, 117.6, 115.2, 71.7, 66.7, 40.2, 39.4; **HRMS(ESI-TOF)**  $m/z$ :  $[\text{M} + \text{H}]^+ \text{C}_{31}\text{H}_{26}\text{NO}_3$   $\text{Scalc}$ . 492.1633, found, 492.1614.

**6. General procedure for the formal [3+2] annulation to aza-bicyclo-[3,3,0]octanes (23-34) [with the use of mono substituted 4-aminocyclopentenones and transposed variants]**

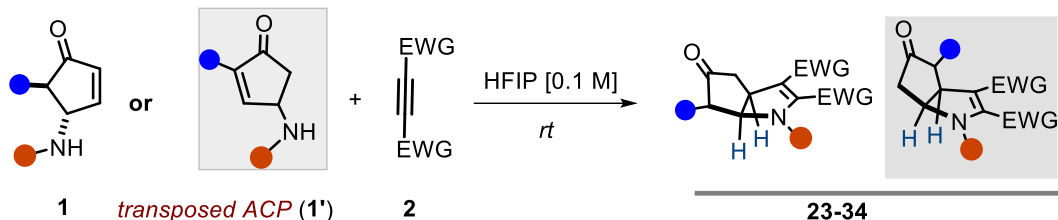

4-aminocyclopentenone **1** or **1'** (1.0 equiv.) and alkyne **2** (1.2 equiv.) were taken in HFIP (0.1M) and stirred at room temperature until complete disappearance of the starting material was observed by TLC (ca. 12-16 h). The crude was then concentrated and the residue was purified by silica gel column chromatography to give the desired [3+2] annulation products (**23-34**). [Note: when the transposed version of 4-aminocyclopentenones (**1'**) were used, the relative spatial orientation between the substituent at  $\alpha$ -position to carbonyl group and that on the nitrogen-atom, was *anti* in the final products].

## 7. Experimental details and characterization of [3+2] annulation products (23-34)

### **Diethyl 5-oxo-1,6-diphenyl-1,3a,4,5,6,6a-hexahydrocyclopenta[b]pyrrole-2,3-dicarboxylate (23)**

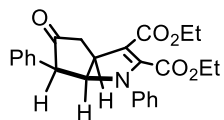

Title compound was prepared according to the general procedure using 4-aminocyclopentenone derivative **1l** (0.040g, 0.16 mmol, 1.0 equiv), alkyne derivative **2a** (0.033g, 0.19 mmol, 1.2 equiv) in presence of HFIP. The crude was then concentrated and purified by flash silica-gel column chromatography (8:2 Hexane/EtOAc) to give the desired products as a colorless liquid in 66% (0.045g) yield;  $R_f$  0.3 (EtOAc : Hexane 2:8);  $^1\text{H NMR}$  (400 MHz,  $\text{CDCl}_3$ )  $\delta$  7.34 (m, 4H), 7.28 - 7.26 (m, 1H), 7.20 - 7.16 (m, 3H), 7.10 (d,  $J = 7.7$  Hz, 2H), 5.21 - 5.16 (m, 1H), 4.30 - 4.22 (m, 2H), 4.11 - 3.97 (m, 3H), 3.75 (d,  $J = 6.5$  Hz, 1H), 2.87 - 2.80 (dd,  $J = 19.3, 7.7$  Hz, 1H), 2.70-2.66 (d,  $J = 19.3$  Hz, 1H), 1.20 (t,  $J = 7.2$  Hz, 3H), 0.97 (t,  $J = 7.1$  Hz, 3H);  $^{13}\text{C}\{^1\text{H}\}$  NMR (100 MHz,  $\text{CDCl}_3$ )  $\delta$  214.9, 164.6, 162.7, 150.1, 139.3, 138.6, 129.7, 128.9, 128.1, 127.3, 125.9, 122.4, 108.2, 65.0, 62.5, 61.1, 59.9, 49.9, 42.4, 14.0, 13.9; HRMS(ESI-TOF)  $m/z$ :  $[\text{M} + \text{Na}]^+\text{C}_{25}\text{H}_{25}\text{NNaO}_5$  calcd. 442.1630, found, 442.1626.

### **Diethyl 5-oxo-1-phenyl-6-(p-tolyl)-1,3a,4,5,6,6a-hexahydrocyclopenta[b]pyrrole-2,3-dicarboxylate (24)**

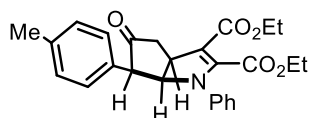

Title compound was prepared according to the general procedure using 4-aminocyclopentenone derivative **1m** (0.040g, 0.15 mmol, 1.0 equiv), alkyne derivative **2a** (0.031g, 0.18 mmol, 1.2 equiv) in presence of HFIP. The crude was then concentrated and purified by flash silica-gel column chromatography (8:2 Hexane/EtOAc) to give the desired products as a colorless liquid in 84% (0.055g) yield;

$R_f$  0.3 (EtOAc : Hexane 1:9);  $^1\text{H NMR}$  (400 MHz,  $\text{CDCl}_3$ )  $\delta$  7.23 (t,  $J = 7.9$  Hz, 2H), 7.12 - 7.09 (m, 3H), 6.95 (d,  $J = 7.6$  Hz, 2H), 6.86 (d,  $J = 8.0$  Hz, 2H), 5.10 (dd,  $J = 10.4$ , 3.0 Hz, 1H), 4.30 - 4.15 (m, 4H), 4.14 - 4.06 (m, 1H), 3.57 (brs, 1H), 2.99 (dd,  $J = 19.7$ , 10.1 Hz, 1H), 2.73 - 2.67 (m, 1H), 2.30 (s, 3H), 1.27 (t,  $J = 7.1$  Hz, 3H), 1.21 (t,  $J = 7.1$  Hz, 3H);  $^{13}\text{C}\{^1\text{H}\}$  NMR (100 MHz,  $\text{CDCl}_3$ )  $\delta$  215.3, 164.6, 162.7, 149.2, 139.3, 137.3, 134.3, 129.9, 129.5, 127.4, 125.6, 122.4, 108.4, 73.5, 62.4, 60.0, 60.0, 43.3, 40.2, 21.1, 14.5, 13.8; HRMS(ESI-TOF)  $m/z$ :  $[\text{M} + \text{Na}]^+\text{C}_{26}\text{H}_{27}\text{NNaO}_5$  calcd. 456.1787, found, 456.1783.

***Dimethyl 5-oxo-1-phenyl-6-(p-tolyl)-1,3a,4,5,6,6a-hexahydrocyclopenta[b]pyrrole-2,3-dicarboxylate (25)***

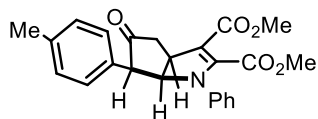

Title compound was prepared according to the general procedure using 4-aminocyclopentenone derivative **1m** (0.040g, 0.15 mmol, 1.0 equiv), alkyne derivative **2b** (0.031g, 0.18 mmol, 1.2 equiv) in presence of HFIP. The crude was then concentrated and purified by flash silica-gel column chromatography (8:2 Hexane/EtOAc) to give the desired products as a colorless liquid in 78% (0.049g) yield;  $R_f$  0.25 (EtOAc : Hexane 2:8);  $^1\text{H NMR}$  (400 MHz,  $\text{CDCl}_3$ )  $\delta$  7.28 - 7.24 (m, 2H), 7.15 - 7.12 (m, 3H), 6.94 (d,  $J = 7.7$  Hz, 2H), 6.89 (d,  $J = 8.0$  Hz, 2H), 5.14 (dd,  $J = 10.4$ , 2.9 Hz, 1H), 4.11 (td,  $J = 10.3$ , 6.1 Hz, 1H), 3.83 (s, 3H), 3.76 (s, 3H), 3.58 (s, 1H), 3.02 (dd,  $J = 19.7$ , 10.1 Hz, 1H), 2.70 (ddd,  $J = 19.7$ , 5.8, 0.9 Hz, 1H), 2.33 (s, 3H);  $^{13}\text{C}\{^1\text{H}\}$  NMR (100 MHz,  $\text{CDCl}_3$ )  $\delta$  215.1, 165.0, 163.2, 149.3, 139.1, 137.4, 134.2, 129.9, 129.6, 127.4, 125.6, 122.0, 108.5, 73.5, 58.9, 53.2, 51.5, 43.3, 40.1, 21.1; HRMS(ESI-TOF)  $m/z$ :  $[\text{M} + \text{Na}]^+\text{C}_{24}\text{H}_{23}\text{NNaO}_5$  calcd. 428.1474, found, 428.1471.



**2-Benzoyl-1-phenyl-6-(*p*-tolyl)-3a,4,6,6a-tetrahydrocyclopenta[*b*]pyrrol-5(1H)-one (26)**

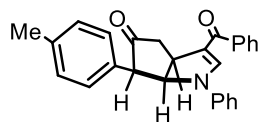

Title compound was prepared according to the general procedure using 4-aminocyclopentenone derivative **1m** (0.040g, 0.15 mmol, 1.0 equiv), alkyne derivative **2c** (0.024g, 0.18 mmol, 1.2 equiv) in presence of HFIP. The crude was then concentrated and purified by flash silica-gel column chromatography (8:2 Hexane/EtOAc) to give the desired products as a colorless liquid in 80% (0.048 g) yield;  $R_f$  0.3 (EtOAc : Hexane 2:8);  **$^1\text{H NMR}$**  (400 MHz,  $\text{CDCl}_3$ )  $\delta$  7.50 - 7.48 (m, 2H), 7.36 - 7.26 (m, 4H), 7.08 - 7.03 (m, 4H), 6.91 (d,  $J = 8.0$  Hz, 2H), 6.83 (t,  $J = 7.4$  Hz, 1H), 6.57 (d,  $J = 8.0$  Hz, 2H), 4.95 (dd,  $J = 10.4, 2.7$  Hz, 1H), 4.23 (m, 1H), 3.37 (s, 1H), 3.02 (dd,  $J = 19.8, 10.4$  Hz, 1H), 2.55 (dd,  $J = 19.7, 3.3$  Hz, 1H), 2.20 (s, 3H);  **$^{13}\text{C}\{^1\text{H}\}$  NMR** (100 MHz,  $\text{CDCl}_3$ )  $\delta$  215.2, 190.3, 146.3, 140.6, 139.4, 137.7, 134.6, 131.0, 130.2, 129.8, 128.6, 128.1, 127.4, 123.3, 121.1, 116.5, 70.3, 59.5, 43.0, 40.8, 21.2; **HRMS(ESI-TOF)**  $m/z$ :  $[\text{M} + \text{Na}]^+\text{C}_{27}\text{H}_{24}\text{NO}_3$  calcd 394.1807, found, 394.1802.

**2-benzoyl-6-(naphthalen-1-yl)-1-phenyl-3a,4,6,6a-tetrahydrocyclopenta[*b*]pyrrol-5(1H)-one (27)**

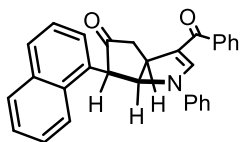

Title compound was prepared according to the general procedure using 4-aminocyclopentenone derivative **1n** (0.042g, 0.14 mmol, 1.0 equiv), alkyne derivative **2c** (0.022g, 0.17 mmol, 1.2 equiv) in presence of HFIP. The crude was then concentrated and purified by flash silica-gel column chromatography (8:2 Hexane/EtOAc) to give the desired products as a colorless liquid in 68% (0.041g) yield;  $R_f$  0.4 (EtOAc : Hexane 2:8);  **$^1\text{H NMR}$**  (400 MHz,  $\text{CDCl}_3$ )  $\delta$  7.88 - 7.83 (m, 3H), 7.73 - 7.71 (m, 2H), 7.61 (s, 1H),

7.54 - 7.47 (m, 6H), 7.30 (d,  $J = 7.1$  Hz, 1H), 7.10 (t,  $J = 7.9$  Hz, 2H), 6.94 (t,  $J = 7.4$  Hz, 1H), 6.67 (d,  $J = 8.0$  Hz, 2H), 5.37 (dd,  $J = 10.5, 3.1$  Hz, 1H), 4.59 (td,  $J = 10.4, 4.7$  Hz, 1H), 4.39 (s, 1H), 3.38 (dd,  $J = 19.7, 10.4$  Hz, 1H), 2.83 (dd,  $J = 19.7, 4.0$  Hz, 1H);  $^{13}\text{C}\{^1\text{H}\}$  NMR (100 MHz,  $\text{CDCl}_3$ )  $\delta$  214.4, 190.3, 146.4, 140.6, 139.4, 134.4, 134.0, 131.1 (2), 129.8, 129.2, 128.8, 128.6, 128.1, 126.9, 126.3, 125.6, 123.9, 123.3, 121.1, 116.5, 70.6, 43.0, 40.8; HRMS(ESI-TOF)  $m/z$ :  $[\text{M} + \text{H}]^+\text{C}_{30}\text{H}_{24}\text{NO}_2$  calcd. 430.1807, found, 430.1806.

**Diethyl 5-oxo-1,4-diphenyl-1,3a,4,5,6,6a-hexahydrocyclopenta[b]pyrrole-2,3-dicarboxylate (28)**

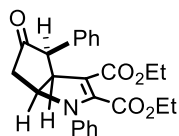

Title compound was prepared according to the general procedure using 4-aminocyclopentenone derivative **1'a** (0.035g, 0.14 mmol, 1.0 equiv), alkyne derivative **2a** (0.028g, 0.17 mmol, 1.2 equiv) in presence of HFIP. The crude was then concentrated and purified by flash silica-gel column chromatography (8:2 Hexane/EtOAc) to give the desired products as a colorless liquid in 54% (0.032g) yield;  $R_f$  0.25 (EtOAc : Hexane 2:8);  $^1\text{H}$  NMR (400 MHz,  $\text{CDCl}_3$ )  $\delta$  7.32 (t,  $J = 7.7$  Hz, 4H), 7.24 (s, 1H), 7.16 (m, 3H), 7.08 (d,  $J = 7.7$  Hz, 2H), 5.17 (ddd,  $J = 10.2, 7.8, 2.5$  Hz, 1H), 4.24 (pd,  $J = 7.6, 3.6$  Hz, 2H), 4.05 - 3.95 (m, 3H), 3.73 (d,  $J = 6.5$  Hz, 1H), 2.85 - 2.78 (m, 1H), 2.69 - 2.64 (m, 1H), 1.18 (t,  $J = 7.1$  Hz, 3H), 0.95 (t,  $J = 7.1$  Hz, 3H);  $^{13}\text{C}\{^1\text{H}\}$  NMR (100 MHz,  $\text{CDCl}_3$ )  $\delta$  214.9, 164.6, 162.7, 150.1, 139.3, 138.6, 129.7, 128.9, 128.1, 127.3, 125.9, 122.4, 108.2, 65.0, 62.5, 61.1, 59.9, 50.0, 42.4, 14.1, 13.9; HRMS(ESI-TOF)  $m/z$ :  $[\text{M} + \text{Na}]^+\text{C}_{25}\text{H}_{25}\text{NNaO}_5$  calcd. 442.1630, found, 442.1630.

**Diethyl 5-oxo-1-phenyl-4-(p-tolyl)-1,3a,4,5,6,6a-hexahydrocyclopenta[b]pyrrole-2,3-dicarboxylate (29)**

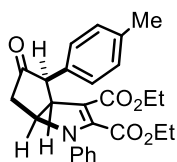

Title compound was prepared according to the general procedure using 4-aminocyclopentenone derivative **1'b** (0.040g, 0.15 mmol, 1.0 equiv), alkyne derivative **2a** (0.031g, 0.18 mmol, 1.2 equiv) in presence of HFIP. The crude was then concentrated and purified by flash silica-gel column chromatography (8:2 Hexane/EtOAc) to give the desired products as a colorless liquid in 69% (0.046g) yield;  $R_f$  0.4 (EtOAc : Hexane 2:8); **<sup>1</sup>H NMR** (400 MHz, CDCl<sub>3</sub>) δ 7.33 (t,  $J$  = 7.7 Hz, 2H), 7.19 - 7.14 (dd,  $J$  = 14.2, 7.5 Hz, 3H), 7.10 - 7.07 (t,  $J$  = 6.4 Hz, 4H), 5.17 (t,  $J$  = 7.8 Hz, 1H), 4.29 - 4.22 (m, 2H), 4.06 - 3.97 (m, 3H), 3.71 (d,  $J$  = 6.2 Hz, 1H), 2.82 (dd,  $J$  = 19.3, 7.7 Hz, 1H), 2.66 (d,  $J$  = 19.2 Hz, 1H), 2.32 (s, 3H), 1.20 (t,  $J$  = 7.1 Hz, 3H), 1.00 (t,  $J$  = 7.1 Hz, 3H); **<sup>13</sup>C{<sup>1</sup>H} NMR** (100 MHz, CDCl<sub>3</sub>) δ 215.1, 164.6, 162.7, 150.0, 139.3, 136.9, 135.7, 129.7, 129.6, 127.8, 125.8, 122.4, 108.2, 64.9, 62.5, 60.7, 59.9, 50.1, 42.3, 21.2, 14.1, 13.9; **HRMS(ESI-TOF)**  $m/z$ : [M + Na]<sup>+</sup>C<sub>26</sub>H<sub>27</sub>NNaO<sub>5</sub>calcd. 456.1787, found, 456.1787.

**Diethyl 4-(4-fluorophenyl)-5-oxo-1-phenyl-1,3a,4,5,6,6a-hexahydrocyclopenta[b]pyrrole-2,3-dicarboxylate (30)**

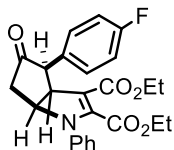

Title compound was prepared according to the general procedure using 4-aminocyclopentenone derivative **1'c** (0.040g, 0.15 mmol, 1.0 equiv), alkyne derivative **2a** (0.031g, 0.18 mmol, 1.2 equiv) in presence of HFIP. The crude was then concentrated and purified by flash silica-gel column chromatography (8:2 Hexane/EtOAc) to give the desired products as a colorless liquid in 53% (0.035g) yield;

$R_f$  0.3 (EtOAc : Hexane 2:8);  $^1\text{H NMR}$  (400 MHz,  $\text{CDCl}_3$ )  $\delta$  7.34 (t,  $J = 7.8$  Hz, 2H), 7.20 - 7.14 (m, 3H), 7.09 (d,  $J = 8.2$  Hz, 2H), 7.03 (t,  $J = 8.6$  Hz, 2H), 5.19 - 5.15 (m, 1H), 4.29 - 4.21 (m, 2H), 4.02 - 3.96 (m, 3H), 3.72 (d,  $J = 7.1$  Hz, 1H), 2.80 (dd,  $J = 19.4, 7.5$  Hz, 1H), 2.71 - 2.66 (d,  $J = 19.2$  Hz, 1H), 1.19 (t,  $J = 7.1$  Hz, 3H), 0.98 (t,  $J = 7.1$  Hz, 3H);  $^{13}\text{C}\{^1\text{H}\}$  NMR (100 MHz,  $\text{CDCl}_3$ )  $\delta$  214.6, 164.5, 163.3, 162.6, 160.8, 150.2, 139.1, 134.1, 129.7(2), 126.0, 122.5, 115.8, 115.6, 108.2, 64.8, 62.5, 60.4, 59.9, 49.8, 42.2, 14.1, 13.8;  $^{19}\text{F NMR}$  (376 MHz,  $\text{CDCl}_3$ )  $\delta$  -115.62(s); **HRMS(ESI-TOF)**  $m/z$ :  $[\text{M} + \text{Na}]^+ \text{C}_{25}\text{H}_{24}\text{FNNaO}_5$  calcd. 460.1536, found, 460.1540.

**Diethyl** **4-(3,4-dimethoxyphenyl)-5-oxo-1-phenyl-1,3a,4,5,6,6a-hexahydrocyclopenta[b]pyrrole-2,3-dicarboxylate (31)**

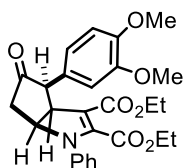

Title compound was prepared according to the general procedure using 4-aminocyclopentenone derivative **1'd** (0.040g, 0.13 mmol, 1.0 equiv), alkyne derivative **2a** (0.027g, 0.16 mmol, 1.2 equiv) in presence of HFIP. The crude was then concentrated and purified by flash silica-gel column chromatography (8:2 Hexane/EtOAc) to give the desired products as a colorless liquid in 63% (0.039g) yield;  $R_f$  0.25 (EtOAc : Hexane 2:8);  $^1\text{H NMR}$  (400 MHz,  $\text{CDCl}_3$ )  $\delta$  7.33 (t,  $J = 7.9$  Hz, 2H), 7.17 (t,  $J = 7.4$  Hz, 1H), 7.10 - 7.08 (m, 2H), 6.83 (d,  $J = 8.2$  Hz, 1H), 6.75 - 6.70 (m, 2H), 5.16 (ddd,  $J = 10.1, 7.8, 2.4$  Hz, 1H), 4.25 (dt,  $J = 10.8, 7.4, 3.6$  Hz, 2H), 4.06 - 3.98 (m, 3H), 3.86 (d,  $J = 9.7$  Hz, 6H), 3.69 (d,  $J = 6.3$  Hz, 1H), 2.82 (dd,  $J = 19.3, 7.7$  Hz, 1H), 2.65 (d,  $J = 19.3$  Hz, 1H), 1.19 (t,  $J = 7.1$  Hz, 3H), 1.01 (t,  $J = 7.1$  Hz, 3H);  $^{13}\text{C}\{^1\text{H}\}$  NMR (100 MHz,  $\text{CDCl}_3$ )  $\delta$  215.0, 164.6, 162.7, 150.0, 149.2, 148.4, 139.3, 131.0, 129.7, 125.9, 122.5, 119.7, 111.8, 111.5, 108.2, 64.9, 62.5, 60.5, 59.9, 56.1(2), 49.9, 42.2, 14.2, 13.9; **HRMS(ESI-TOF)**  $m/z$ :  $[\text{M} + \text{Na}]^+ \text{C}_{27}\text{H}_{29}\text{NNaO}_7$  calcd. 502.1842, found, 502.1836.

**3-Benzoyl-4-(4-fluorophenyl)-1-phenyl-3a,4,6,6a-tetrahydrocyclopenta[b]pyrrol-5(1H)-one (32)**

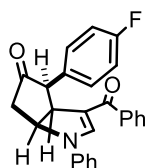

Title compound was prepared according to the general procedure using 4-aminocyclopentenone derivative **1'c** (0.040g, 0.15 mmol, 1.0 equiv), alkyne derivative **2c** (0.024g, 0.18 mmol, 1.2 equiv) in presence of HFIP. The crude was then concentrated and purified by flash silica-gel column chromatography (8:2 Hexane/EtOAc) to give the desired products as a colorless liquid in 60% (0.037g) yield;  $R_f$  0.3 (EtOAc : Hexane 2:8);  **$^1\text{H NMR}$**  (400 MHz,  $\text{CDCl}_3$ )  $\delta$  7.66 (d,  $J = 7.1$  Hz, 2H), 7.56 (s, 1H), 7.53 - 7.43 (m, 3H), 7.37 - 7.30 (m, 4H), 7.10 - 7.04 (m, 3H), 6.94 (d,  $J = 8.1$  Hz, 2H), 5.23 - 5.17 (m, 1H), 4.35 (dd,  $J = 10.4, 3.8$  Hz, 1H), 3.90 (d,  $J = 2.7$  Hz, 1H), 3.12 (dd,  $J = 19.3, 8.6$  Hz, 1H), 2.65 (d,  $J = 19.1$  Hz, 1H);  **$^{13}\text{C}\{^1\text{H}\}$  NMR** (100 MHz,  $\text{CDCl}_3$ )  $\delta$  215.2, 190.2, 163.3, 160.9, 146.0, 140.5, 139.4, 134.9 (2), 131.1, 130.1, 129.4, 129.3, 128.6, 128.1, 123.4, 120.0, 116.0, 115.9, 115.8, 61.2, 59.4, 50.9, 43.1;  **$^{19}\text{F NMR}$**  (376 MHz,  $\text{CDCl}_3$ )  $\delta$  -115.50 (s); **HRMS(ESI-TOF)**  $m/z$ :  $[\text{M} + \text{H}]^+ \text{C}_{26}\text{H}_{21}\text{FNO}_2$  calcd. 398.1556, found, 398.1557.

**3-Benzoyl-4-(3,4-dimethoxyphenyl)-1-phenyl-3a,4,6,6a-tetrahydrocyclopenta[b]pyrrol-5(1H)-one (33)**

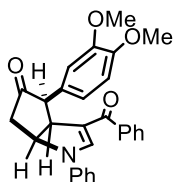

Title compound was prepared according to the general procedure using 4-aminocyclopentenone derivative **1'd** (0.040g, 0.13 mmol, 1.0 equiv), alkyne derivative **2c** (0.021g, 0.16 mmol, 1.2 equiv) in presence of HFIP. The crude was then

concentrated and purified by flash silica-gel column chromatography (8:2 Hexane/EtOAc) to give the desired products as a colorless liquid in 61% (0.035g) yield;  $R_f$  0.3 (EtOAc : Hexane 3:7);  $^1\text{H NMR}$  (400 MHz,  $\text{CDCl}_3$ )  $\delta$  7.66 (d,  $J = 7.0$  Hz, 2H), 7.55 (s, 1H), 7.52 - 7.43 (m, 3H), 7.34 (t,  $J = 7.9$  Hz, 2H), 7.06 (t,  $J = 7.4$  Hz, 1H), 7.00 (d,  $J = 1.0$  Hz, 1H), 6.94 (d,  $J = 8.0$  Hz, 2H), 6.86 - 6.80 (m, 2H), 5.23 - 5.12 (m, 1H), 4.39 (dd,  $J = 10.4, 3.0$  Hz, 1H), 3.92 - 3.89 (m, 4H), 3.86 (s, 3H), 3.13 (dd,  $J = 19.1, 8.7$  Hz, 1H), 2.62 - 2.55 (m, 1H);  $^{13}\text{C}\{^1\text{H}\}$  NMR (100 MHz,  $\text{CDCl}_3$ )  $\delta$  215.4, 190.3, 149.4, 148.4, 145.9, 140.6, 139.4, 131.7, 131.0, 130.0, 128.5, 128.1, 123.3, 119.8, 118.7, 115.8, 111.7, 111.4, 61.3, 59.3, 56.1, 56.0, 50.8, 42.9; **HRMS(ESI-TOF)**  $m/z$ :  $[\text{M} + \text{H}]^+\text{C}_{28}\text{H}_{26}\text{NO}_4$  calcd. 440.1862, found, 440.1858.

**3-Benzoyl-4-(2-bromophenyl)-1-phenyl-3a,4,6,6a-tetrahydrocyclopenta[b]pyrrol-5(1H)-one (34)**

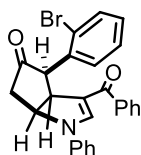

Title compound was prepared according to the general procedure using 4-aminocyclopentenone derivative **1'e** (0.040g, 0.12 mmol, 1.0 equiv), alkyne derivative **2c** (0.020g, 0.15 mmol, 1.2 equiv) in presence of HFIP. The crude was then concentrated and purified by flash silica-gel column chromatography (8:2 Hexane/EtOAc) to give the desired products as a colorless liquid in 84% (0.047g) yield;  $R_f$  0.3 (EtOAc : Hexane 3:7);  $^1\text{H NMR}$  (400 MHz,  $\text{CDCl}_3$ )  $\delta$  7.66 (d,  $J = 7.1$  Hz, 2H), 7.58 - 7.54 (m, 2H), 7.50 - 7.43 (m, 3H), 7.38 - 7.32 (m, 4H), 7.18 - 7.15 (m, 1H), 7.07 (t,  $J = 7.3$  Hz, 1H), 6.97 (d,  $J = 8.1$  Hz, 2H), 5.36 - 5.30 (m, 1H), 4.41 (dd,  $J = 10.8, 6.7$  Hz, 1H), 3.98 (d,  $J = 6.4$  Hz, 1H), 3.30 (dd,  $J = 19.2, 8.3$  Hz, 1H), 2.71 (dd,  $J = 19.1, 5.3$  Hz, 1H);  $^{13}\text{C}\{^1\text{H}\}$  NMR (100 MHz,  $\text{CDCl}_3$ )  $\delta$  214.3, 190.1, 145.7, 140.7, 139.5, 133.9, 133.1, 130.9, 130.0, 129.2, 128.5, 128.0, 127.8, 123.2, 122.8, 121.0, 115.8, 62.9, 62.0, 50.3, 44.8; **HRMS(ESI-TOF)**  $m/z$ :  $[\text{M} + \text{Na}]^+ \text{C}_{26}\text{H}_{20}\text{BrNNaO}_2$  calcd. 480.0575, found, 480.0577.

## 8. General Procedure of DDQ Oxidation (35-40)

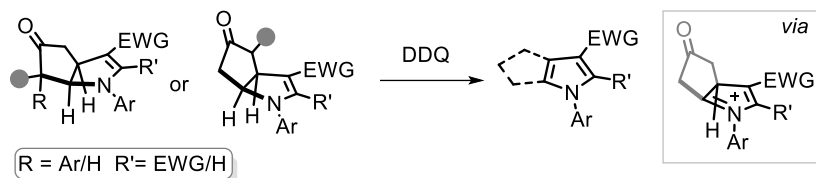

Starting material (1.0 equiv.) was taken in toluene (0.1 M) and was added DDQ (1.5 equiv). The resulting mixture was stirred for 24 h at room temperature (TLC monitored). Solvent was removed in vacuo and crude residue was purified by silica-gel column chromatography to give fused pyrrole derivatives **35-40**.

## 9. Experimental details and characterization of DDQ oxidation product (35-40)

### **Dimethyl**      **5-oxo-1,6,6-triphenyl-1,4,5,6-tetrahydrocyclopenta[b]pyrrole-2,3-dicarboxylate (35)**

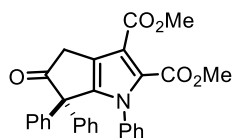

Title compound was prepared according to the general procedure using annulation product **14** (0.040g, 0.08 mmol, 1.0 equiv) and DDQ (0.029g, 0.13 mmol, 1.5 equiv) in presence of Toluene. The crude was then concentrated and purified by flash silica-gel column chromatography (8:2 Hexane/EtOAc) to give the desired products as a colorless liquid in 80% (0.032g) yield;  $R_f$  0.5 (EtOAc : Hexane 2:8);  $^1\text{H NMR}$  (400 MHz,  $\text{CDCl}_3$ )  $\delta$  7.21 - 7.12 (m, 7H), 7.00 (t,  $J = 7.9$  Hz, 2H), 6.91 - 6.89 (m, 4H), 6.67 - 6.64 (m, 2H), 3.89 (s, 3H), 3.66 (s, 2H), 3.63 (s, 3H);  $^{13}\text{C}\{^1\text{H}\}$  NMR (100 MHz,  $\text{CDCl}_3$ )  $\delta$  212.9, 164.2, 161.5, 140.6, 139.5, 136.7, 130.5, 129.2, 128.7, 128.5, 128.2, 127.5, 121.2, 114.3, 67.0, 52.5, 52.0, 38.7; **HRMS(ESI-TOF)**  $m/z$ :  $[\text{M} + \text{Na}]^+$   $\text{C}_{29}\text{H}_{23}\text{NNaO}_5$  calcd. 488.1474, found, 488.1471.

### **Diethyl**      **6,6-diethyl-5-oxo-1-phenyl-1,4,5,6-tetrahydrocyclopenta[b]pyrrole-2,3-dicarboxylate (36)**

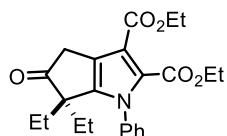

Title compound was prepared according to the general procedure using annulation product **13** (0.039g, 0.10 mmol, 1.0 equiv) and DDQ (0.034g, 0.15 mmol, 1.5 equiv) in presence of Toluene. The crude was then concentrated and purified by flash silica-gel column chromatography (7:3 Hexane/EtOAc) to give the desired products as a colorless liquid in 76% (0.029g) yield;  $R_f$  0.25 (EtOAc : Hexane 3:7);  $^1\text{H NMR}$  (400 MHz,  $\text{CDCl}_3$ )  $\delta$



7.47 - 7.40 (m, 3H), 7.26 - 7.24 (m, 2H), 4.30 (q,  $J = 7.1$  Hz, 2H), 4.08 (q,  $J = 7.1$  Hz, 2H), 3.34 (s, 2H), 1.64 (dq,  $J = 14.7, 7.3$  Hz, 2H), 1.33 (t,  $J = 7.1$  Hz, 3H), 1.29 - 1.10 (m, 2H), 1.02 (t,  $J = 7.1$  Hz, 3H), 0.58 (t,  $J = 7.5$  Hz, 6H);  $^{13}\text{C}\{^1\text{H}\}$  NMR (100 MHz,  $\text{CDCl}_3$ )  $\delta$  220.3, 164.0, 160.8, 139.8, 137.8, 129.4 (2), 129.1, 127.0, 122.8, 115.3, 61.3, 60.7, 59.8, 41.0, 30.6, 14.4, 13.8, 9.8; **HRMS(ESI-TOF)**  $m/z$ :  $[\text{M} + \text{H}]^+ \text{C}_{23}\text{H}_{28}\text{NO}_5$  calcd. 398.1967, found, 398.1946.

**Diethyl (R)-6-methyl-5-oxo-1,6-diphenyl-1,4,5,6-tetrahydrocyclopenta[b]pyrrole-2,3-dicarboxylate (37)**

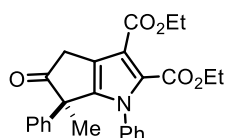

Title compound was prepared according to the general procedure using annulation product **11** (0.038g, 0.09 mmol, 1.0 equiv) and DDQ (0.030g, 0.13 mmol, 1.5 equiv) in presence of Toluene. The crude was then concentrated and purified by flash silica-gel column chromatography (8:2 Hexane/EtOAc) to give the desired products as a colorless liquid in 71% (0.027g) yield;  $R_f$  0.3 (EtOAc : Hexane 2:8);  $^1\text{H}$  NMR (400 MHz,  $\text{CDCl}_3$ )  $\delta$  7.24 - 7.12 (m, 6H), 6.96 - 6.83 (m, 4H), 4.31 (q,  $J = 7.1$  Hz, 2H), 4.07 (q,  $J = 7.1$  Hz, 2H), 3.58 (q,  $J = 22.0$  Hz, 2H), 1.35 - 1.31 (m, 6H), 0.99 (t,  $J = 7.1$  Hz, 3H);  $^{13}\text{C}\{^1\text{H}\}$  NMR (101 MHz,  $\text{CDCl}_3$ )  $\delta$  214.2, 163.8, 160.9, 142.6, 140.5, 137.2, 129.8, 128.9, 128.8, 128.7, 127.4, 127.0, 126.4, 121.0, 114.9, 61.5, 60.7, 55.7, 38.3, 20.1, 14.4, 13.8; **HRMS(ESI-TOF)**  $m/z$ :  $[\text{M} + \text{H}]^+ \text{C}_{26}\text{H}_{26}\text{NO}_5$  calcd. 432.1811, found, 432.1806.

### 3-(1-Naphthoyl)-1,6,6-triphenyl-4,6-dihydrocyclopenta[b]pyrrol-5(1H)-one (38)

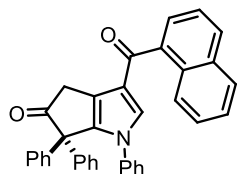

Title compound was prepared according to the general procedure using annulation product **20** (0.037g, 0.07 mmol, 1.0 equiv) and DDQ (0.025g, 0.11 mmol, 1.5 equiv) in presence of Toluene. The crude was then concentrated and purified by flash silica-gel column chromatography (8:2 Hexane/EtOAc) to give the desired products as a colorless liquid in 60% (0.022g) yield;  $R_f$  0.3 (EtOAc : Hexane 1:9);  $^1\text{H NMR}$  (400 MHz,  $\text{CDCl}_3$ )  $\delta$  8.31 - 8.29 (m, 1H), 7.96 (d,  $J = 8.3$  Hz, 1H), 7.91 - 7.89 (m, 1H), 7.79 (dd,  $J = 7.0, 0.9$  Hz, 1H), 7.57 - 7.50 (m, 3H), 7.21 - 7.13 (m, 8H), 7.06 - 7.01 (m, 6H), 6.70 (d,  $J = 7.5$  Hz, 2H), 3.60 (s, 2H);  $^{13}\text{C}\{^1\text{H}\}$  NMR (100 MHz,  $\text{CDCl}_3$ )  $\delta$  213.8, 140.1, 138.4, 138.1, 133.9, 132.6, 130.8, 130.6, 129.4, 128.9, 128.5, 128.3, 127.5, 127.2, 126.6, 126.3, 126.1, 125.8, 124.6, 122.9, 122.1, 66.6, 39.2; HRMS(ESI-TOF)  $m/z$ :  $[\text{M} + \text{H}]^+\text{C}_{36}\text{H}_{26}\text{NO}_2$  calcd. 504.1964, found, 504.1960.

### Dimethyl 5-oxo-1-phenyl-6-(*p*-tolyl)-1,4,5,6-tetrahydrocyclopenta[b]pyrrole-2,3-dicarboxylate (39)

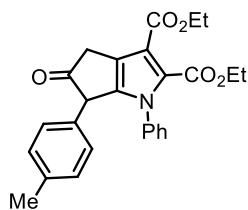

Title compound was prepared according to the general procedure using annulation product **24** (0.035g, 0.09 mmol, 1.0 equiv) and DDQ (0.030g, 0.13 mmol, 1.5 equiv) in presence of Toluene. The crude was then concentrated and purified by flash silica-gel column chromatography (8:2 Hexane/EtOAc) to give the desired products as a colorless liquid in 68% (0.024g) yield;  $R_f$  0.3 (EtOAc : Hexane 1:9);  $^1\text{H NMR}$  (400 MHz,  $\text{CDCl}_3$ )  $\delta$

7.25 - 7.19 (m, 3H), 7.00 - 6.96 (m, 4H), 6.73 (d,  $J = 8.0$  Hz, 2H), 4.34 (s, 1H), 3.89 (s, 3H), 3.70 (s, 3H), 3.61 (d,  $J = 3.3$  Hz, 2H), 2.24 (s, 3H);  $^{13}\text{C}\{^1\text{H}\}$  NMR (100 MHz,  $\text{CDCl}_3$ )  $\delta$  211.5, 164.2, 161.6, 138.1, 137.4 (2), 133.0, 129.6, 129.4, 129.0, 128.6, 127.5, 125.8, 122.9, 115.0, 55.2, 52.5, 52.0, 39.6, 21.2; HRMS(ESI-TOF)  $m/z$ :  $[\text{M} + \text{Na}]^+$   $\text{C}_{24}\text{H}_{21}\text{NNaO}_5$  calcd. 426.1317, found, 426.1316.

**Diethyl 5-oxo-1-phenyl-4-(*p*-tolyl)-1,4,5,6-tetrahydrocyclopenta[*b*]pyrrole-2,3-dicarboxylate (40)**

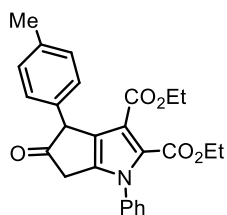

Title compound was prepared according to the general procedure using annulation product **29** (0.030g, 0.09 mmol, 1.0 equiv) and DDQ (0.024g, 0.10 mmol, 1.5 equiv) in presence of Toluene. The crude was then concentrated and purified by flash silica-gel column chromatography (8:2 Hexane/EtOAc) to give the desired products as a colorless liquid in 44% (0.013g) yield;  $R_f$  0.3 (EtOAc : Hexane 1:9);  $^1\text{H}$  NMR (400 MHz,  $\text{CDCl}_3$ )  $\delta$  7.51 - 7.45 (m, 3H), 7.35 - 7.33 (m, 2H), 7.12 - 7.07 (m, 4H), 4.69 (s, 1H), 4.19 (q,  $J = 7.1$  Hz, 2H), 4.06 - 4.00 (m, 2H), 3.40 - 3.25 (m, 2H), 2.31 (s, 3H), 1.12 (t,  $J = 7.1$  Hz, 3H), 0.93 (t,  $J = 7.1$  Hz, 3H);  $^{13}\text{C}\{^1\text{H}\}$  NMR (100 MHz,  $\text{CDCl}_3$ )  $\delta$  210.8, 163.3, 161.1, 138.2, 137.0, 135.6, 134.6, 129.6, 129.3, 128.8, 127.7, 125.6, 125.0, 116.6, 61.7, 60.5, 57.0, 37.7, 21.2, 13.9; HRMS(ESI-TOF)  $m/z$ :  $[\text{M} + \text{Na}]^+$   $\text{C}_{26}\text{H}_{25}\text{NNaO}_5$  calcd. 454.1630, found, 454.1632.

## 10. General procedure for the reduction of olefin<sup>5</sup>

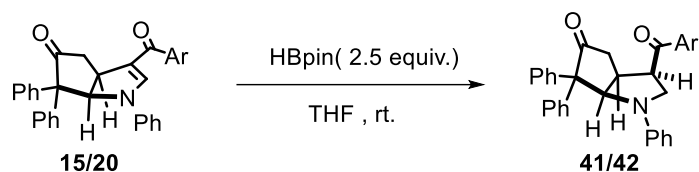

Starting material (compound **15** or **20**; 1.0 equiv.) was taken in dry THF (0.1 M) and was added HBpin (2.5 equiv.). The reaction mixture was stirred for 10 min at room temperature (TLC monitored). Upon completion of the reaction, solvent was removed in vacuo and the crude residue was purified by silica-gel column chromatography to give the reduced products **41/42**.

## 11. Characterization data of compounds 41-42

### **3-Benzoyl-1,6,6-triphenylhexahydrocyclopenta[b]pyrrol-5(1H)-one (41)**

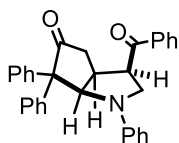

Following the general procedure, dihydropyrrole **15** (0.020g, 0.044 mmol) was converted to fully saturated compound **41** in 75% yield (0.015g; oil); eluent (n-hexanes/ethyl acetate = 10:1); **<sup>1</sup>H NMR** (400 MHz, DMSO-*d*<sub>6</sub>) δ 8.07 (d, *J* = 7.4 Hz, 2H), 7.66 – 7.63 (m, 1H), 7.59 – 7.52 (m, 4H), 7.49 – 7.45 (m, 2H), 7.41 – 7.37 (m, 1H), 6.84 – 6.80 (m, 3H), 6.77 – 6.73 (m, 2H), 6.69 – 6.67 (m, 2H), 6.36 (t, *J* = 7.2 Hz, 1H), 6.30 (d, *J* = 8.2 Hz, 2H), 5.54 (d, *J* = 5.8 Hz, 1H), 4.42 – 4.36 (m, 1H), 4.11 (t, *J* = 10.7 Hz, 1H), 3.73 – 3.69 (m, 1H), 3.58 – 3.49 (m, 1H), 2.36 – 2.24 (m, 2H); **<sup>13</sup>C{<sup>1</sup>H} NMR** (100 MHz, DMSO-*d*<sub>6</sub>) δ 214.8, 198.7, 148.9, 140.4, 137.9, 136.3, 133.6, 131.1, 128.9 (2), 128.6, 128.2, 127.9, 127.5, 126.2, 126.0, 116.4, 114.1, 69.2, 68.3, 52.6, 47.6, 36.2, 35.6; HRMS(ESI-TOF) *m/z*: [M + H]<sup>+</sup>C<sub>32</sub>H<sub>27</sub>NO<sub>2</sub>calcd. 458.2115, found, 458.2121.

### **(2-Naphthoyl)-1,6,6-triphenylhexahydrocyclopenta[b]pyrrol-5(1H)-one (42)**

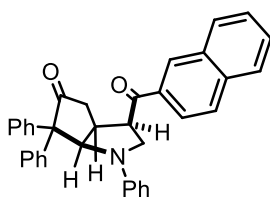

Following the general procedure, dihydropyrrole **20** (0.017g, 0.034 mmol, 1.0 equiv) was converted to fully saturated compound **42** in 70% yield (0.12 g; oil); eluent (n-hexanes/ethyl acetate = 10:1); **<sup>1</sup>H NMR** (400 MHz, DMSO) δ 8.13 (t, *J* = 9.1 Hz, 2H), 8.00 (d, *J* = 8.2 Hz, 1H), 7.79 (d, *J* = 7.1 Hz, 1H), 7.63 – 7.54 (m, 2H), 7.54 – 7.48 (m, 1H), 7.46 – 7.31 (m, 5H), 7.15-7.08 (m, 3H), 6.97 – 6.79 (m, 4H), 6.44 (t, *J* = 7.2 Hz, 1H), 6.17 (d, *J* = 8.1 Hz, 2H), 5.47 (d, *J* = 7.4 Hz, 1H), 3.92-3.86 (m, 1H), 3.53 – 3.46 (m, 2H), 3.31 (d, *J* = 4.1 Hz, 1H), 2.94-2.86 (m, 1H), 2.65-2.60 (m, 1H). **<sup>13</sup>C{<sup>1</sup>H} NMR** (100 MHz, DMSO) δ 217.1, 202.9, 147.2, 141.3, 139.0, 135.3, 133.4, 132.6, 130.8,

129.5, 128.7, 128.6, 128.4 (2), 127.9, 127.6, 127.3, 127.2, 126.8, 126.7, 125.0, 124.9, 116.3, 112.9, 71.4, 67.7, 53.7, 52.4, 40.7, 29.1; HRMS(ESI-TOF) m/z: [M + H]<sup>+</sup> C<sub>36</sub>H<sub>29</sub>NO<sub>2</sub> calcd. 508.2271, found, 508.2263.

**Ethyl** **(3a*S*,6a*R*)-3-benzoyl-5-oxo-1,6,6-triphenyl-1,3a,4,5,6,6a-hexahydrocyclopenta[*b*]pyrrole-2-carboxylate (46)**

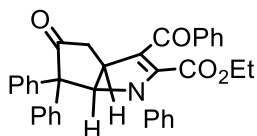

Title compound was prepared according to the general procedure using 4-aminocyclopentenone derivative **1a** (0.040g, 0.12 mmol, 1.0 equiv), ethyl 4-oxo-4-phenylbut-2-ynoate **2k** (0.030g, 0.14 mmol, 1.2 equiv) in presence of HFIP. The crude was then concentrated and purified by flash silica-gel column chromatography (8:2 Hexane/EtOAc) to give the desired products as semi-solid (green) in 82% (0.051 g) yield; R<sub>f</sub> 0.3 (EtOAc : Hexane 2:8); **<sup>1</sup>H NMR** (400 MHz, CDCl<sub>3</sub>) δ 7.42 (m, 3H), 7.36 – 7.29 (m, 7H), 7.09 (m, 3H), 7.03 (m, 2H), 6.99 – 6.92 (m, 3H), 6.57 – 6.45 (m, 2H), 5.66 (d, J = 10.2 Hz, 1H), 4.65 (td, J = 10.3, 4.0 Hz, 1H), 3.50 – 3.39 (m, 1H), 3.26 – 3.16 (m, 1H), 3.02 (dd, J = 19.5, 10.4 Hz, 1H), 2.65 (dd, J = 19.5, 3.9 Hz, 1H), 0.70 (t, J = 7.2 Hz, 3H); **<sup>13</sup>C{<sup>1</sup>H} NMR** (100 MHz, CDCl<sub>3</sub>) δ 214.8, 191.5, 161.5, 152.1, 142.1, 140.6, 140.4, 139.0, 131.3, 131.0, 129.0, 128.8, 128.3, 128.2, 128.0, 127.9, 127.8, 127.1, 126.0, 124.5, 120.6, 77.2, 67.1, 61.8, 41.8, 41.6, 13.3; **HRMS** (ESI-TOF) m/z: [M+H]<sup>+</sup> C<sub>35</sub>H<sub>30</sub>NO<sub>4</sub> calcd. 528.2169, found, 528.2171.

## 12. Crystallographic Data

### Compound 3:

Crystal structures of **3** was obtained using a Bruker D8 Quest equipped with a micro-focus source for generating Mo K $\alpha$  radiation ( $\lambda = 0.71073 \text{ \AA}$ ) and an Apex II CCD Detector. Data were recorded at 298K. Integration and scaling of the recorded data were performed by SAINT and SADABS program respectively. Molecular structures were solved by direct methods using SHELXT-2018 and refined by full-matrix least-squares on F using SHELXL-2018/3 version. All non-hydrogen atoms in the compounds were refined anisotropically and hydrogen atoms were placed at calculated positions using riding models.

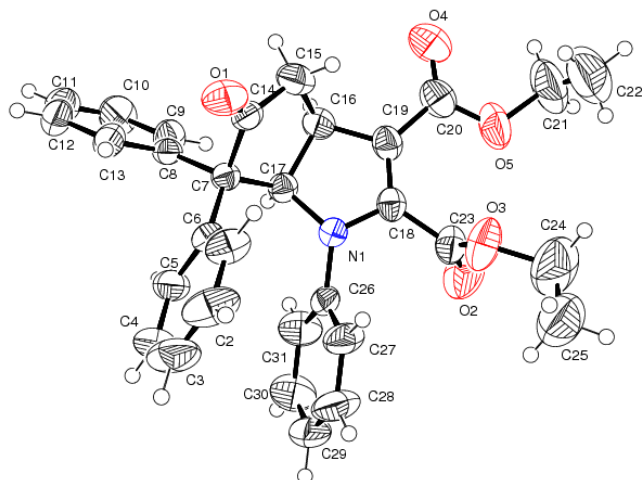

**Figure S3. ORTEP diagram of 3 (CCDC No 2331633):** Atoms are shown with 30% probability of thermal ellipsoids

**Table S1.** Crystal data and structure refinement for compound **3**

|                                   |                                                  |                  |
|-----------------------------------|--------------------------------------------------|------------------|
| Identification code               | SP-1162                                          |                  |
| Empirical formula                 | C <sub>31</sub> H <sub>29</sub> N O <sub>5</sub> |                  |
| Formula weight                    | 495.55                                           |                  |
| Temperature                       | 298(2) K                                         |                  |
| Wavelength                        | 0.71073 Å                                        |                  |
| Crystal system                    | Triclinic                                        |                  |
| Space group                       | P -1                                             |                  |
| Unit cell dimensions              | a = 10.8447(8) Å                                 | α = 101.529(3)°. |
|                                   | b = 11.1980(8) Å                                 | β = 90.637(3)°.  |
|                                   | c = 12.0881(10) Å                                | γ = 113.153(3)°. |
| Volume                            | 1315.93(18) Å <sup>3</sup>                       |                  |
| Z                                 | 2                                                |                  |
| Density (calculated)              | 1.251 Mg/m <sup>3</sup>                          |                  |
| Absorption coefficient            | 0.085 mm <sup>-1</sup>                           |                  |
| F(000)                            | 524                                              |                  |
| Crystal size                      | 0.268 x 0.134 x 0.078 mm <sup>3</sup>            |                  |
| Theta range for data collection   | 3.457 to 25.498°.                                |                  |
| Index ranges                      | -13 ≤ h ≤ 13, -13 ≤ k ≤ 13, -14 ≤ l ≤ 14         |                  |
| Reflections collected             | 42149                                            |                  |
| Independent reflections           | 4884 [R(int) = 0.0930]                           |                  |
| Completeness to theta = 25.242°   | 99.7 %                                           |                  |
| Absorption correction             | Semi-empirical from equivalents                  |                  |
| Max. and min. transmission        | 0.7453 and 0.5683                                |                  |
| Refinement method                 | Full-matrix least-squares on F <sup>2</sup>      |                  |
| Data / restraints / parameters    | 4884 / 51 / 353                                  |                  |
| Goodness-of-fit on F <sup>2</sup> | 1.054                                            |                  |
| Final R indices [I > 2σ(I)]       | R1 = 0.0681, wR2 = 0.1330                        |                  |
| R indices (all data)              | R1 = 0.1094, wR2 = 0.1519                        |                  |
| Extinction coefficient            | n/a                                              |                  |
| Largest diff. peak and hole       | 0.285 and -0.197 e.Å <sup>-3</sup>               |                  |



**Table S2.** Atomic coordinates (  $\times 10^4$ ) and equivalent isotropic displacement parameters ( $\text{\AA}^2 \times 10^3$ )

for compound **3**.  $U(\text{eq})$  is defined as one third of the trace of the orthogonalized  $U^{ij}$  tensor.

|       | x       | y       | z       | $U(\text{eq})$ |
|-------|---------|---------|---------|----------------|
| C(1)  | 1785(3) | 1593(3) | 742(3)  | 59(1)          |
| C(2)  | 2220(4) | 823(3)  | -78(3)  | 82(1)          |
| C(3)  | 3402(4) | 1405(4) | -531(3) | 89(1)          |
| C(4)  | 4163(4) | 2737(4) | -175(3) | 75(1)          |
| C(5)  | 3725(3) | 3503(3) | 622(2)  | 54(1)          |
| C(6)  | 2536(2) | 2946(2) | 1098(2) | 40(1)          |
| C(7)  | 2125(2) | 3825(2) | 2021(2) | 36(1)          |
| C(8)  | 2289(2) | 5132(2) | 1677(2) | 39(1)          |
| C(9)  | 2921(3) | 6383(3) | 2371(3) | 55(1)          |
| C(10) | 3001(4) | 7506(3) | 2005(3) | 72(1)          |
| C(11) | 2445(4) | 7395(4) | 947(3)  | 75(1)          |
| C(12) | 1805(3) | 6163(4) | 250(3)  | 67(1)          |
| C(13) | 1724(3) | 5042(3) | 608(2)  | 53(1)          |
| C(14) | 618(3)  | 3229(3) | 2228(2) | 44(1)          |
| C(15) | 478(3)  | 3690(4) | 3445(3) | 79(1)          |
| C(16) | 1858(3) | 4237(3) | 4102(2) | 53(1)          |
| C(17) | 2861(2) | 4114(2) | 3218(2) | 41(1)          |
| C(18) | 2773(3) | 2783(2) | 4490(2) | 44(1)          |
| C(19) | 2008(3) | 3425(3) | 4908(2) | 50(1)          |
| C(20) | 1315(3) | 3336(3) | 5931(3) | 64(1)          |
| C(21) | 1077(5) | 2548(5) | 7658(3) | 115(2)         |
| C(22) | 111(5)  | 1264(6) | 7586(5) | 140(2)         |
| C(26) | 4296(2) | 2739(3) | 3012(2) | 44(1)          |
| C(27) | 4107(3) | 1461(3) | 2557(3) | 65(1)          |
| C(28) | 5154(3) | 1178(3) | 2118(4) | 83(1)          |
| C(29) | 6395(3) | 2171(4) | 2139(3) | 73(1)          |
| C(30) | 6584(3) | 3446(4) | 2597(3) | 78(1)          |
| C(31) | 5548(3) | 3748(3) | 3042(3) | 66(1)          |
| N(1)  | 3182(2) | 3010(2) | 3452(2) | 44(1)          |
| O(1)  | -300(2) | 2555(2) | 1505(2) | 65(1)          |

|        |          |           |          |         |
|--------|----------|-----------|----------|---------|
| O(4)   | 505(3)   | 3805(3)   | 6161(2)  | 92(1)   |
| O(5)   | 1699(3)  | 2702(3)   | 6604(2)  | 92(1)   |
| C(23)  | 3310(3)  | 2006(3)   | 5089(3)  | 58(1)   |
| O(2)   | 4386(3)  | 2508(3)   | 5624(2)  | 99(1)   |
| O(3)   | 2472(3)  | 756(2)    | 4932(2)  | 87(1)   |
| C(24)  | 2640(20) | -74(14)   | 5726(12) | 134(5)  |
| C(25)  | 2797(16) | -1175(13) | 5012(8)  | 116(4)  |
| C(24') | 3215(16) | 53(18)    | 5450(20) | 92(5)   |
| C(25') | 2030(20) | -1150(30) | 5540(30) | 203(13) |

---

**Table S3.** Bond lengths [Å] and angles [°] for Compound **3**

---

|              |          |
|--------------|----------|
| C(1)-C(6)    | 1.380(4) |
| C(1)-C(2)    | 1.392(4) |
| C(1)-H(1)    | 0.9300   |
| C(2)-C(3)    | 1.368(5) |
| C(2)-H(2)    | 0.9300   |
| C(3)-C(4)    | 1.363(5) |
| C(3)-H(3)    | 0.9300   |
| C(4)-C(5)    | 1.375(4) |
| C(4)-H(4)    | 0.9300   |
| C(5)-C(6)    | 1.382(4) |
| C(5)-H(5)    | 0.9300   |
| C(6)-C(7)    | 1.526(3) |
| C(7)-C(8)    | 1.545(3) |
| C(7)-C(14)   | 1.548(3) |
| C(7)-C(17)   | 1.555(3) |
| C(8)-C(9)    | 1.378(4) |
| C(8)-C(13)   | 1.392(4) |
| C(9)-C(10)   | 1.387(4) |
| C(9)-H(9)    | 0.9300   |
| C(10)-C(11)  | 1.369(5) |
| C(10)-H(10)  | 0.9300   |
| C(11)-C(12)  | 1.366(5) |
| C(11)-H(11)  | 0.9300   |
| C(12)-C(13)  | 1.379(4) |
| C(12)-H(12)  | 0.9300   |
| C(13)-H(13)  | 0.9300   |
| C(14)-O(1)   | 1.204(3) |
| C(14)-C(15)  | 1.488(4) |
| C(15)-C(16)  | 1.518(4) |
| C(15)-H(15A) | 0.9700   |
| C(15)-H(15B) | 0.9700   |
| C(16)-C(19)  | 1.507(4) |
| C(16)-C(17)  | 1.558(3) |
| C(16)-H(16)  | 0.9800   |

|              |           |
|--------------|-----------|
| C(17)-N(1)   | 1.485(3)  |
| C(17)-H(17)  | 0.9800    |
| C(18)-C(19)  | 1.338(4)  |
| C(18)-N(1)   | 1.375(3)  |
| C(18)-C(23)  | 1.505(4)  |
| C(19)-C(20)  | 1.454(4)  |
| C(20)-O(4)   | 1.197(4)  |
| C(20)-O(5)   | 1.340(4)  |
| C(21)-C(22)  | 1.392(6)  |
| C(21)-O(5)   | 1.457(4)  |
| C(21)-H(21A) | 0.9700    |
| C(21)-H(21B) | 0.9700    |
| C(22)-H(22A) | 0.9600    |
| C(22)-H(22B) | 0.9600    |
| C(22)-H(22C) | 0.9600    |
| C(26)-C(27)  | 1.359(4)  |
| C(26)-C(31)  | 1.378(4)  |
| C(26)-N(1)   | 1.439(3)  |
| C(27)-C(28)  | 1.378(4)  |
| C(27)-H(27)  | 0.9300    |
| C(28)-C(29)  | 1.364(4)  |
| C(28)-H(28)  | 0.9300    |
| C(29)-C(30)  | 1.355(5)  |
| C(29)-H(29)  | 0.9300    |
| C(30)-C(31)  | 1.380(4)  |
| C(30)-H(30)  | 0.9300    |
| C(31)-H(31)  | 0.9300    |
| C(23)-O(2)   | 1.190(3)  |
| C(23)-O(3)   | 1.308(4)  |
| O(3)-C(24)   | 1.518(10) |
| O(3)-C(24')  | 1.533(11) |
| C(24)-C(25)  | 1.426(14) |
| C(24)-H(24A) | 0.9700    |
| C(24)-H(24B) | 0.9700    |
| C(25)-H(25A) | 0.9600    |
| C(25)-H(25B) | 0.9600    |

|                  |            |
|------------------|------------|
| C(25)-H(25C)     | 0.9600     |
| C(24')-C(25')    | 1.476(18)  |
| C(24')-H(24C)    | 0.9700     |
| C(24')-H(24D)    | 0.9700     |
| C(25')-H(25D)    | 0.9600     |
| C(25')-H(25E)    | 0.9600     |
| C(25')-H(25F)    | 0.9600     |
|                  |            |
| C(6)-C(1)-C(2)   | 120.4(3)   |
| C(6)-C(1)-H(1)   | 119.8      |
| C(2)-C(1)-H(1)   | 119.8      |
| C(3)-C(2)-C(1)   | 120.0(3)   |
| C(3)-C(2)-H(2)   | 120.0      |
| C(1)-C(2)-H(2)   | 120.0      |
| C(4)-C(3)-C(2)   | 120.2(3)   |
| C(4)-C(3)-H(3)   | 119.9      |
| C(2)-C(3)-H(3)   | 119.9      |
| C(3)-C(4)-C(5)   | 119.9(3)   |
| C(3)-C(4)-H(4)   | 120.0      |
| C(5)-C(4)-H(4)   | 120.0      |
| C(4)-C(5)-C(6)   | 121.4(3)   |
| C(4)-C(5)-H(5)   | 119.3      |
| C(6)-C(5)-H(5)   | 119.3      |
| C(1)-C(6)-C(5)   | 118.1(2)   |
| C(1)-C(6)-C(7)   | 122.4(2)   |
| C(5)-C(6)-C(7)   | 119.5(2)   |
| C(6)-C(7)-C(8)   | 110.77(19) |
| C(6)-C(7)-C(14)  | 114.7(2)   |
| C(8)-C(7)-C(14)  | 102.57(17) |
| C(6)-C(7)-C(17)  | 114.01(18) |
| C(8)-C(7)-C(17)  | 111.06(19) |
| C(14)-C(7)-C(17) | 102.95(19) |
| C(9)-C(8)-C(13)  | 117.6(2)   |
| C(9)-C(8)-C(7)   | 124.4(2)   |
| C(13)-C(8)-C(7)  | 118.0(2)   |
| C(8)-C(9)-C(10)  | 120.8(3)   |

|                     |            |
|---------------------|------------|
| C(8)-C(9)-H(9)      | 119.6      |
| C(10)-C(9)-H(9)     | 119.6      |
| C(11)-C(10)-C(9)    | 120.7(3)   |
| C(11)-C(10)-H(10)   | 119.7      |
| C(9)-C(10)-H(10)    | 119.7      |
| C(12)-C(11)-C(10)   | 119.4(3)   |
| C(12)-C(11)-H(11)   | 120.3      |
| C(10)-C(11)-H(11)   | 120.3      |
| C(11)-C(12)-C(13)   | 120.2(3)   |
| C(11)-C(12)-H(12)   | 119.9      |
| C(13)-C(12)-H(12)   | 119.9      |
| C(12)-C(13)-C(8)    | 121.3(3)   |
| C(12)-C(13)-H(13)   | 119.3      |
| C(8)-C(13)-H(13)    | 119.3      |
| O(1)-C(14)-C(15)    | 125.4(3)   |
| O(1)-C(14)-C(7)     | 125.2(2)   |
| C(15)-C(14)-C(7)    | 109.3(2)   |
| C(14)-C(15)-C(16)   | 108.2(2)   |
| C(14)-C(15)-H(15A)  | 110.1      |
| C(16)-C(15)-H(15A)  | 110.1      |
| C(14)-C(15)-H(15B)  | 110.1      |
| C(16)-C(15)-H(15B)  | 110.1      |
| H(15A)-C(15)-H(15B) | 108.4      |
| C(19)-C(16)-C(15)   | 114.9(3)   |
| C(19)-C(16)-C(17)   | 102.8(2)   |
| C(15)-C(16)-C(17)   | 106.6(2)   |
| C(19)-C(16)-H(16)   | 110.7      |
| C(15)-C(16)-H(16)   | 110.7      |
| C(17)-C(16)-H(16)   | 110.7      |
| N(1)-C(17)-C(7)     | 114.56(19) |
| N(1)-C(17)-C(16)    | 103.50(19) |
| C(7)-C(17)-C(16)    | 107.20(19) |
| N(1)-C(17)-H(17)    | 110.4      |
| C(7)-C(17)-H(17)    | 110.4      |
| C(16)-C(17)-H(17)   | 110.4      |
| C(19)-C(18)-N(1)    | 113.1(2)   |

|                     |          |
|---------------------|----------|
| C(19)-C(18)-C(23)   | 126.7(2) |
| N(1)-C(18)-C(23)    | 119.8(2) |
| C(18)-C(19)-C(20)   | 128.3(3) |
| C(18)-C(19)-C(16)   | 109.7(2) |
| C(20)-C(19)-C(16)   | 122.0(3) |
| O(4)-C(20)-O(5)     | 123.4(3) |
| O(4)-C(20)-C(19)    | 123.6(3) |
| O(5)-C(20)-C(19)    | 113.0(3) |
| C(22)-C(21)-O(5)    | 112.3(4) |
| C(22)-C(21)-H(21A)  | 109.2    |
| O(5)-C(21)-H(21A)   | 109.2    |
| C(22)-C(21)-H(21B)  | 109.2    |
| O(5)-C(21)-H(21B)   | 109.2    |
| H(21A)-C(21)-H(21B) | 107.9    |
| C(21)-C(22)-H(22A)  | 109.5    |
| C(21)-C(22)-H(22B)  | 109.5    |
| H(22A)-C(22)-H(22B) | 109.5    |
| C(21)-C(22)-H(22C)  | 109.5    |
| H(22A)-C(22)-H(22C) | 109.5    |
| H(22B)-C(22)-H(22C) | 109.5    |
| C(27)-C(26)-C(31)   | 119.3(2) |
| C(27)-C(26)-N(1)    | 119.2(2) |
| C(31)-C(26)-N(1)    | 121.4(2) |
| C(26)-C(27)-C(28)   | 120.3(3) |
| C(26)-C(27)-H(27)   | 119.8    |
| C(28)-C(27)-H(27)   | 119.8    |
| C(29)-C(28)-C(27)   | 120.7(3) |
| C(29)-C(28)-H(28)   | 119.6    |
| C(27)-C(28)-H(28)   | 119.6    |
| C(30)-C(29)-C(28)   | 118.9(3) |
| C(30)-C(29)-H(29)   | 120.5    |
| C(28)-C(29)-H(29)   | 120.5    |
| C(29)-C(30)-C(31)   | 121.2(3) |
| C(29)-C(30)-H(30)   | 119.4    |
| C(31)-C(30)-H(30)   | 119.4    |
| C(26)-C(31)-C(30)   | 119.5(3) |

|                      |            |
|----------------------|------------|
| C(26)-C(31)-H(31)    | 120.2      |
| C(30)-C(31)-H(31)    | 120.2      |
| C(18)-N(1)-C(26)     | 121.4(2)   |
| C(18)-N(1)-C(17)     | 108.65(19) |
| C(26)-N(1)-C(17)     | 122.8(2)   |
| C(20)-O(5)-C(21)     | 118.3(3)   |
| O(2)-C(23)-O(3)      | 126.1(3)   |
| O(2)-C(23)-C(18)     | 121.9(3)   |
| O(3)-C(23)-C(18)     | 112.0(3)   |
| C(23)-O(3)-C(24)     | 119.0(8)   |
| C(23)-O(3)-C(24')    | 106.4(7)   |
| C(25)-C(24)-O(3)     | 105.4(11)  |
| C(25)-C(24)-H(24A)   | 110.7      |
| O(3)-C(24)-H(24A)    | 110.7      |
| C(25)-C(24)-H(24B)   | 110.7      |
| O(3)-C(24)-H(24B)    | 110.7      |
| H(24A)-C(24)-H(24B)  | 108.8      |
| C(24)-C(25)-H(25A)   | 109.5      |
| C(24)-C(25)-H(25B)   | 109.5      |
| H(25A)-C(25)-H(25B)  | 109.5      |
| C(24)-C(25)-H(25C)   | 109.5      |
| H(25A)-C(25)-H(25C)  | 109.5      |
| H(25B)-C(25)-H(25C)  | 109.5      |
| C(25')-C(24')-O(3)   | 97.8(15)   |
| C(25')-C(24')-H(24C) | 112.2      |
| O(3)-C(24')-H(24C)   | 112.2      |
| C(25')-C(24')-H(24D) | 112.2      |
| O(3)-C(24')-H(24D)   | 112.2      |
| H(24C)-C(24')-H(24D) | 109.8      |
| C(24')-C(25')-H(25D) | 109.5      |
| C(24')-C(25')-H(25E) | 109.5      |
| H(25D)-C(25')-H(25E) | 109.5      |
| C(24')-C(25')-H(25F) | 109.5      |
| H(25D)-C(25')-H(25F) | 109.5      |
| H(25E)-C(25')-H(25F) | 109.5      |

---

Symmetry transformations used to generate equivalent atoms:



**Table S4.** Anisotropic displacement parameters ( $\text{\AA}^2 \times 10^3$ ) for Compound **3**.The anisotropic displacement factor exponent takes the form:  $-2\pi^2 [ h^2 a^{*2} U^{11} + \dots + 2 h k a^* b^* U^{12} ]$ 

|       | $U^{11}$ | $U^{22}$ | $U^{33}$ | $U^{23}$ | $U^{13}$ | $U^{12}$ |
|-------|----------|----------|----------|----------|----------|----------|
| C(1)  | 48(2)    | 40(2)    | 82(2)    | 2(2)     | -4(2)    | 17(1)    |
| C(2)  | 78(2)    | 54(2)    | 104(3)   | -24(2)   | -20(2)   | 37(2)    |
| C(3)  | 101(3)   | 99(3)    | 82(3)    | -14(2)   | 3(2)     | 73(3)    |
| C(4)  | 76(2)    | 92(3)    | 75(2)    | 17(2)    | 28(2)    | 53(2)    |
| C(5)  | 52(2)    | 54(2)    | 62(2)    | 14(1)    | 16(1)    | 27(1)    |
| C(6)  | 38(1)    | 39(1)    | 44(2)    | 8(1)     | -2(1)    | 19(1)    |
| C(7)  | 34(1)    | 34(1)    | 41(1)    | 9(1)     | 5(1)     | 14(1)    |
| C(8)  | 35(1)    | 41(1)    | 47(2)    | 14(1)    | 10(1)    | 19(1)    |
| C(9)  | 70(2)    | 41(2)    | 56(2)    | 13(1)    | 9(2)     | 22(1)    |
| C(10) | 95(3)    | 42(2)    | 85(3)    | 20(2)    | 25(2)    | 30(2)    |
| C(11) | 88(2)    | 67(2)    | 101(3)   | 51(2)    | 38(2)    | 48(2)    |
| C(12) | 64(2)    | 83(2)    | 73(2)    | 43(2)    | 14(2)    | 39(2)    |
| C(13) | 51(2)    | 56(2)    | 58(2)    | 21(1)    | 2(1)     | 24(1)    |
| C(14) | 37(2)    | 44(2)    | 58(2)    | 20(1)    | 7(1)     | 19(1)    |
| C(15) | 61(2)    | 134(3)   | 67(2)    | 39(2)    | 24(2)    | 57(2)    |
| C(16) | 64(2)    | 59(2)    | 47(2)    | 12(1)    | 14(1)    | 34(2)    |
| C(17) | 40(1)    | 38(1)    | 44(2)    | 11(1)    | 5(1)     | 15(1)    |
| C(18) | 43(2)    | 40(1)    | 42(2)    | 11(1)    | 1(1)     | 10(1)    |
| C(19) | 59(2)    | 52(2)    | 38(2)    | 10(1)    | 7(1)     | 22(1)    |
| C(20) | 74(2)    | 66(2)    | 45(2)    | 4(2)     | 11(2)    | 25(2)    |
| C(21) | 155(4)   | 139(4)   | 61(3)    | 44(3)    | 44(3)    | 58(4)    |
| C(22) | 120(4)   | 161(5)   | 140(5)   | 82(4)    | 50(3)    | 34(4)    |
| C(26) | 38(1)    | 53(2)    | 48(2)    | 20(1)    | 4(1)     | 23(1)    |
| C(27) | 45(2)    | 51(2)    | 109(3)   | 34(2)    | 24(2)    | 24(1)    |
| C(28) | 64(2)    | 62(2)    | 144(4)   | 36(2)    | 34(2)    | 41(2)    |
| C(29) | 51(2)    | 92(3)    | 94(3)    | 31(2)    | 21(2)    | 42(2)    |
| C(30) | 37(2)    | 85(3)    | 99(3)    | 17(2)    | 10(2)    | 13(2)    |
| C(31) | 44(2)    | 62(2)    | 80(2)    | 2(2)     | 1(2)     | 14(2)    |
| N(1)  | 43(1)    | 50(1)    | 45(1)    | 19(1)    | 9(1)     | 23(1)    |
| O(1)  | 35(1)    | 64(1)    | 86(2)    | 10(1)    | -1(1)    | 13(1)    |
| O(4)  | 109(2)   | 120(2)   | 68(2)    | 21(1)    | 36(1)    | 66(2)    |

|        |         |         |         |         |        |        |
|--------|---------|---------|---------|---------|--------|--------|
| O(5)   | 130(2)  | 113(2)  | 56(2)   | 42(1)   | 36(1)  | 61(2)  |
| C(23)  | 64(2)   | 62(2)   | 53(2)   | 23(2)   | 4(2)   | 24(2)  |
| O(2)   | 78(2)   | 119(2)  | 97(2)   | 39(2)   | -31(2) | 30(2)  |
| O(3)   | 112(2)  | 57(1)   | 93(2)   | 34(1)   | -6(2)  | 28(1)  |
| C(24)  | 145(12) | 82(7)   | 188(12) | 67(7)   | 25(8)  | 42(9)  |
| C(25)  | 161(11) | 107(8)  | 107(7)  | 29(5)   | 11(6)  | 77(8)  |
| C(24') | 105(11) | 76(9)   | 114(11) | 67(8)   | -1(8)  | 36(8)  |
| C(25') | 190(20) | 160(19) | 270(30) | 150(20) | 5(19)  | 29(17) |

---

**Table S5.** Hydrogen coordinates ( $\times 10^4$ ) and isotropic displacement parameters ( $\text{\AA}^2 \times 10^3$ ) for Compound **3**.

|        | x    | y     | z     | U(eq) |
|--------|------|-------|-------|-------|
| H(1)   | 983  | 1194  | 1053  | 71    |
| H(2)   | 1707 | -88   | -317  | 99    |
| H(3)   | 3688 | 891   | -1084 | 106   |
| H(4)   | 4977 | 3127  | -470  | 90    |
| H(5)   | 4239 | 4415  | 845   | 65    |
| H(9)   | 3299 | 6475  | 3094  | 66    |
| H(10)  | 3436 | 8343  | 2483  | 87    |
| H(11)  | 2503 | 8152  | 705   | 90    |
| H(12)  | 1423 | 6079  | -469  | 80    |
| H(13)  | 1283 | 4209  | 125   | 63    |
| H(15A) | -146 | 2953  | 3733  | 95    |
| H(15B) | 132  | 4377  | 3529  | 95    |
| H(16)  | 2121 | 5168  | 4496  | 64    |
| H(17)  | 3677 | 4941  | 3346  | 49    |
| H(21A) | 1770 | 2758  | 8266  | 138   |
| H(21B) | 659  | 3176  | 7844  | 138   |
| H(22A) | -271 | 1208  | 8296  | 210   |
| H(22B) | -587 | 1059  | 6994  | 210   |
| H(22C) | 524  | 640   | 7417  | 210   |
| H(27)  | 3267 | 773   | 2541  | 78    |
| H(28)  | 5012 | 300   | 1805  | 99    |
| H(29)  | 7099 | 1977  | 1842  | 88    |
| H(30)  | 7427 | 4129  | 2613  | 94    |
| H(31)  | 5695 | 4626  | 3361  | 80    |
| H(24A) | 3429 | 441   | 6267  | 161   |
| H(24B) | 1854 | -380  | 6138  | 161   |
| H(25A) | 2909 | -1742 | 5468  | 175   |
| H(25B) | 2011 | -1669 | 4480  | 175   |
| H(25C) | 3576 | -853  | 4608  | 175   |
| H(24C) | 3828 | -160  | 4952  | 110   |

|        |      |       |      |     |
|--------|------|-------|------|-----|
| H(24D) | 3696 | 566   | 6186 | 110 |
| H(25D) | 2312 | -1723 | 5866 | 304 |
| H(25E) | 1432 | -888  | 6023 | 304 |
| H(25F) | 1562 | -1605 | 4804 | 304 |

---

**Table S6.** Torsion angles [°] for Compound **3**

---

|                         |           |
|-------------------------|-----------|
| C(6)-C(1)-C(2)-C(3)     | 0.4(5)    |
| C(1)-C(2)-C(3)-C(4)     | 0.6(6)    |
| C(2)-C(3)-C(4)-C(5)     | -1.6(6)   |
| C(3)-C(4)-C(5)-C(6)     | 1.7(5)    |
| C(2)-C(1)-C(6)-C(5)     | -0.3(4)   |
| C(2)-C(1)-C(6)-C(7)     | -178.0(3) |
| C(4)-C(5)-C(6)-C(1)     | -0.7(4)   |
| C(4)-C(5)-C(6)-C(7)     | 177.0(3)  |
| C(1)-C(6)-C(7)-C(8)     | -135.8(2) |
| C(5)-C(6)-C(7)-C(8)     | 46.6(3)   |
| C(1)-C(6)-C(7)-C(14)    | -20.3(3)  |
| C(5)-C(6)-C(7)-C(14)    | 162.1(2)  |
| C(1)-C(6)-C(7)-C(17)    | 98.1(3)   |
| C(5)-C(6)-C(7)-C(17)    | -79.6(3)  |
| C(6)-C(7)-C(8)-C(9)     | -132.0(3) |
| C(14)-C(7)-C(8)-C(9)    | 105.1(3)  |
| C(17)-C(7)-C(8)-C(9)    | -4.3(3)   |
| C(6)-C(7)-C(8)-C(13)    | 50.1(3)   |
| C(14)-C(7)-C(8)-C(13)   | -72.8(3)  |
| C(17)-C(7)-C(8)-C(13)   | 177.8(2)  |
| C(13)-C(8)-C(9)-C(10)   | -0.7(4)   |
| C(7)-C(8)-C(9)-C(10)    | -178.6(3) |
| C(8)-C(9)-C(10)-C(11)   | 0.4(5)    |
| C(9)-C(10)-C(11)-C(12)  | 0.1(5)    |
| C(10)-C(11)-C(12)-C(13) | -0.2(5)   |
| C(11)-C(12)-C(13)-C(8)  | -0.2(4)   |
| C(9)-C(8)-C(13)-C(12)   | 0.7(4)    |
| C(7)-C(8)-C(13)-C(12)   | 178.7(2)  |
| C(6)-C(7)-C(14)-O(1)    | -35.3(3)  |
| C(8)-C(7)-C(14)-O(1)    | 84.9(3)   |
| C(17)-C(7)-C(14)-O(1)   | -159.7(2) |
| C(6)-C(7)-C(14)-C(15)   | 148.3(2)  |
| C(8)-C(7)-C(14)-C(15)   | -91.5(3)  |
| C(17)-C(7)-C(14)-C(15)  | 23.9(3)   |

|                         |             |
|-------------------------|-------------|
| O(1)-C(14)-C(15)-C(16)  | 167.6(3)    |
| C(7)-C(14)-C(15)-C(16)  | -16.0(3)    |
| C(14)-C(15)-C(16)-C(19) | -112.0(3)   |
| C(14)-C(15)-C(16)-C(17) | 1.1(3)      |
| C(6)-C(7)-C(17)-N(1)    | -33.2(3)    |
| C(8)-C(7)-C(17)-N(1)    | -159.22(19) |
| C(14)-C(7)-C(17)-N(1)   | 91.6(2)     |
| C(6)-C(7)-C(17)-C(16)   | -147.4(2)   |
| C(8)-C(7)-C(17)-C(16)   | 86.6(2)     |
| C(14)-C(7)-C(17)-C(16)  | -22.6(2)    |
| C(19)-C(16)-C(17)-N(1)  | 13.6(3)     |
| C(15)-C(16)-C(17)-N(1)  | -107.6(3)   |
| C(19)-C(16)-C(17)-C(7)  | 135.0(2)    |
| C(15)-C(16)-C(17)-C(7)  | 13.9(3)     |
| N(1)-C(18)-C(19)-C(20)  | 174.6(3)    |
| C(23)-C(18)-C(19)-C(20) | -12.2(5)    |
| N(1)-C(18)-C(19)-C(16)  | -1.3(3)     |
| C(23)-C(18)-C(19)-C(16) | 171.8(3)    |
| C(15)-C(16)-C(19)-C(18) | 107.2(3)    |
| C(17)-C(16)-C(19)-C(18) | -8.2(3)     |
| C(15)-C(16)-C(19)-C(20) | -69.1(4)    |
| C(17)-C(16)-C(19)-C(20) | 175.6(3)    |
| C(18)-C(19)-C(20)-O(4)  | -169.4(3)   |
| C(16)-C(19)-C(20)-O(4)  | 6.1(5)      |
| C(18)-C(19)-C(20)-O(5)  | 12.0(5)     |
| C(16)-C(19)-C(20)-O(5)  | -172.5(3)   |
| C(31)-C(26)-C(27)-C(28) | -0.8(5)     |
| N(1)-C(26)-C(27)-C(28)  | 179.2(3)    |
| C(26)-C(27)-C(28)-C(29) | 0.4(6)      |
| C(27)-C(28)-C(29)-C(30) | -0.1(6)     |
| C(28)-C(29)-C(30)-C(31) | 0.2(6)      |
| C(27)-C(26)-C(31)-C(30) | 0.9(5)      |
| N(1)-C(26)-C(31)-C(30)  | -179.1(3)   |
| C(29)-C(30)-C(31)-C(26) | -0.6(5)     |
| C(19)-C(18)-N(1)-C(26)  | 162.0(2)    |
| C(23)-C(18)-N(1)-C(26)  | -11.6(4)    |

|                          |            |
|--------------------------|------------|
| C(19)-C(18)-N(1)-C(17)   | 10.9(3)    |
| C(23)-C(18)-N(1)-C(17)   | -162.8(2)  |
| C(27)-C(26)-N(1)-C(18)   | 77.6(3)    |
| C(31)-C(26)-N(1)-C(18)   | -102.4(3)  |
| C(27)-C(26)-N(1)-C(17)   | -135.4(3)  |
| C(31)-C(26)-N(1)-C(17)   | 44.6(4)    |
| C(7)-C(17)-N(1)-C(18)    | -131.5(2)  |
| C(16)-C(17)-N(1)-C(18)   | -15.1(3)   |
| C(7)-C(17)-N(1)-C(26)    | 77.9(3)    |
| C(16)-C(17)-N(1)-C(26)   | -165.7(2)  |
| O(4)-C(20)-O(5)-C(21)    | 1.4(5)     |
| C(19)-C(20)-O(5)-C(21)   | 180.0(3)   |
| C(22)-C(21)-O(5)-C(20)   | 103.4(5)   |
| C(19)-C(18)-C(23)-O(2)   | -91.6(4)   |
| N(1)-C(18)-C(23)-O(2)    | 81.1(4)    |
| C(19)-C(18)-C(23)-O(3)   | 89.2(4)    |
| N(1)-C(18)-C(23)-O(3)    | -98.0(3)   |
| O(2)-C(23)-O(3)-C(24)    | 18.5(9)    |
| C(18)-C(23)-O(3)-C(24)   | -162.4(8)  |
| O(2)-C(23)-O(3)-C(24')   | -6.3(11)   |
| C(18)-C(23)-O(3)-C(24')  | 172.9(11)  |
| C(23)-O(3)-C(24)-C(25)   | -122.8(14) |
| C(23)-O(3)-C(24')-C(25') | 162(2)     |

---

Symmetry transformations used to generate equivalent atoms:

**Table S7.** Hydrogen bonds for Compound **3** [Å and °].

| D-H...A                | d(D-H) | d(H...A) | d(D...A) | <(DHA) |
|------------------------|--------|----------|----------|--------|
| C(15)-H(15B)...O(4)#1  | 0.97   | 2.36     | 3.326(5) | 174.3  |
| C(25')-H(25F)...O(4)#2 | 0.96   | 2.63     | 3.41(3)  | 139.2  |

Symmetry transformations used to generate equivalent atoms:

#1 -x,-y+1,-z+1 #2 -x,-y,-z+1



### 13. NMR spectra of new compound

<sup>1</sup>H NMR spectra at 400 MHz and <sup>13</sup>C NMR spectra at 100 MHz in CDCl<sub>3</sub>(1'd)

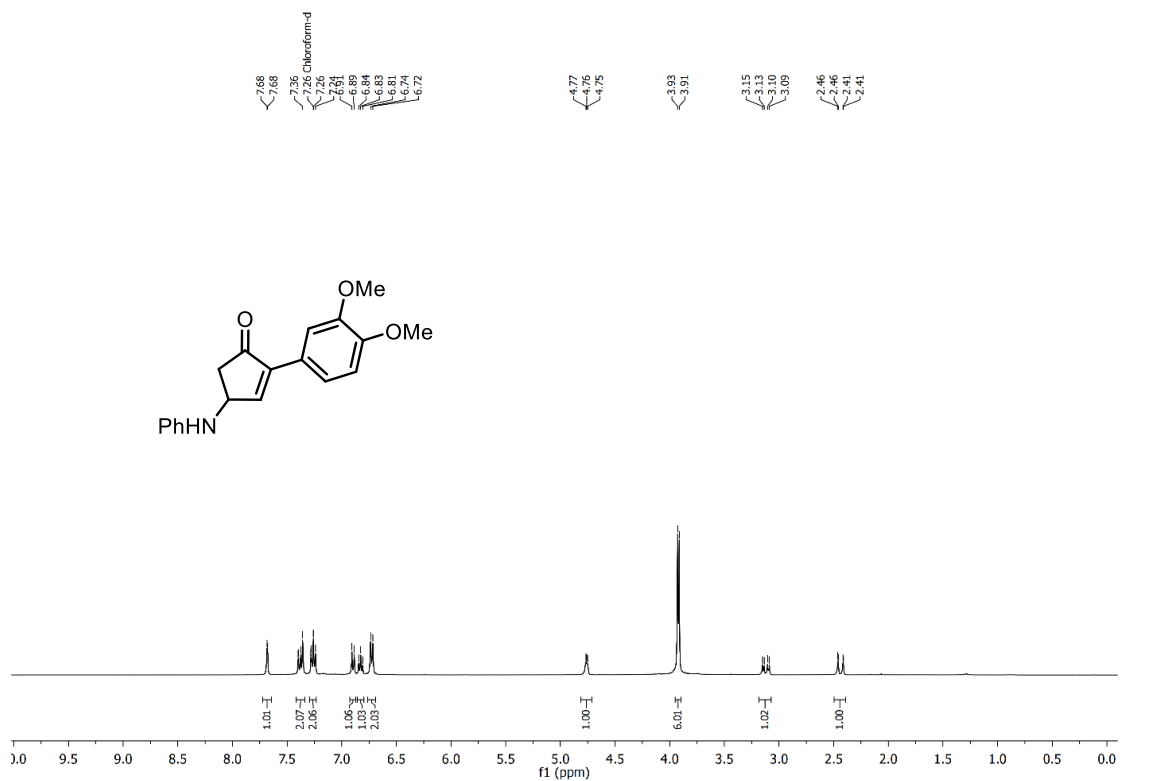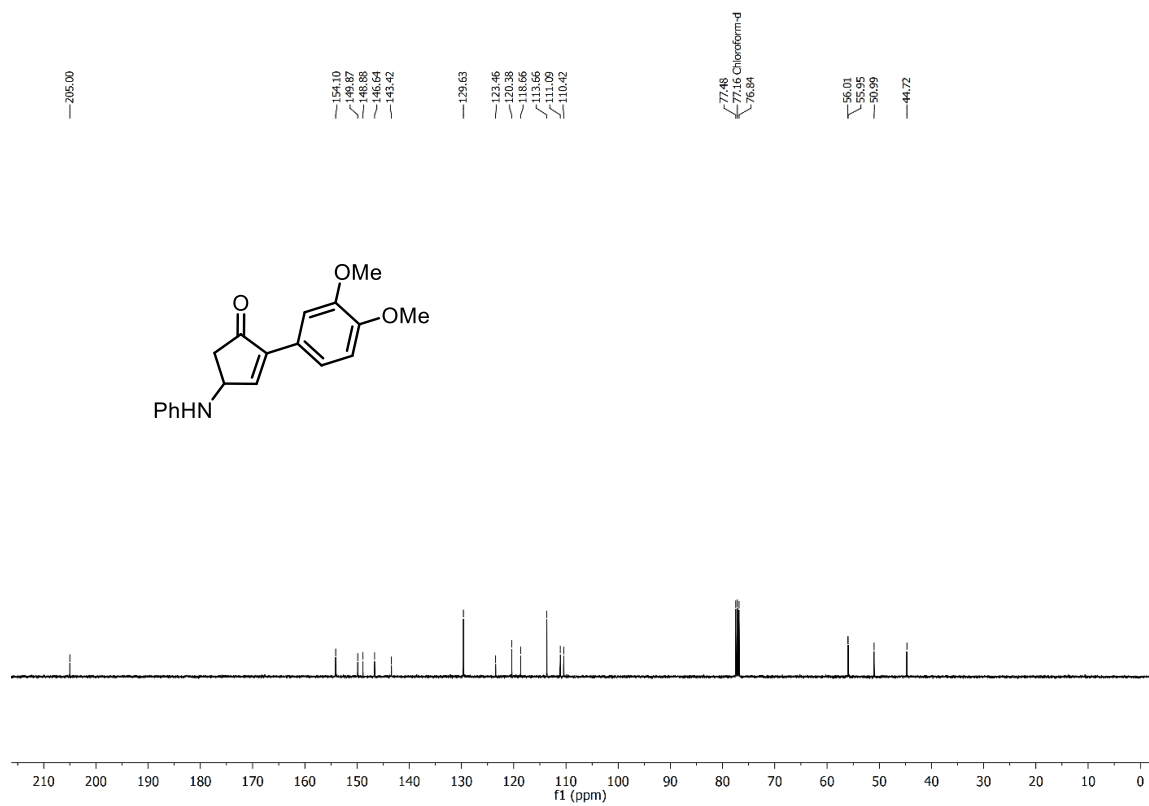

$^1\text{H}$  NMR spectra at 400 MHz and  $^{13}\text{C}$  NMR spectra at 100 MHz in  $\text{CDCl}_3$  (**1'e**)

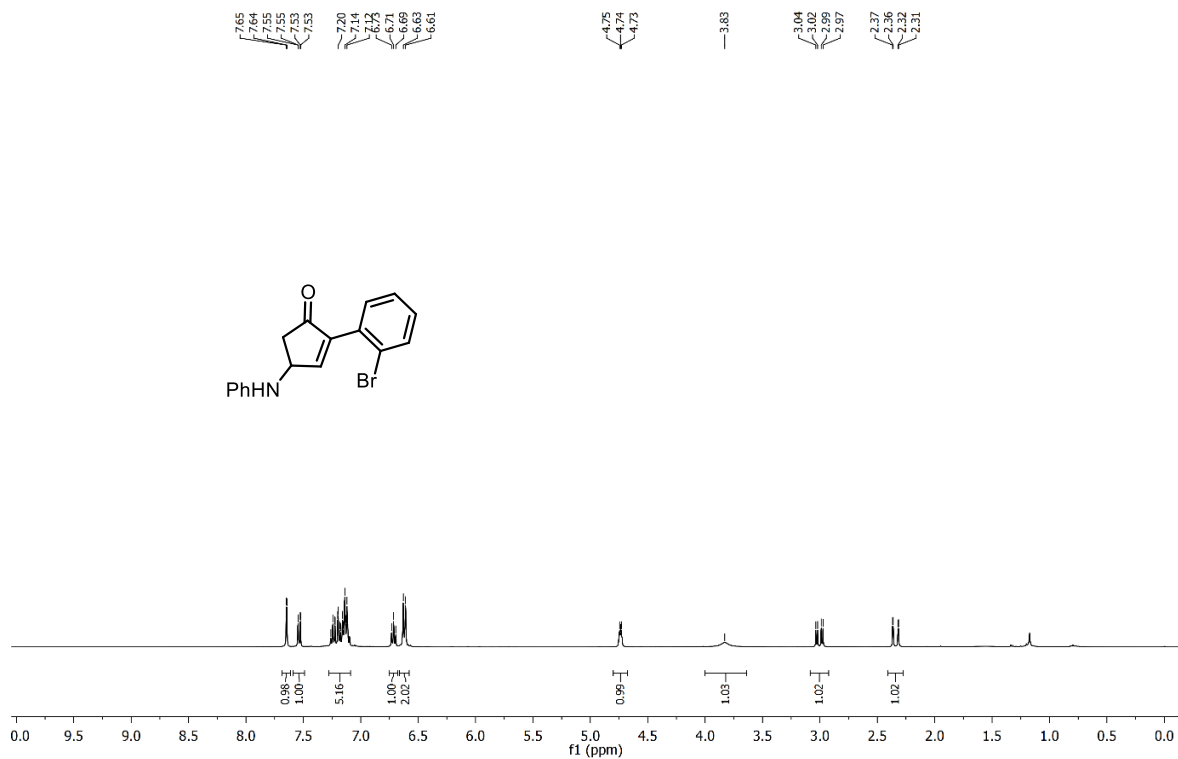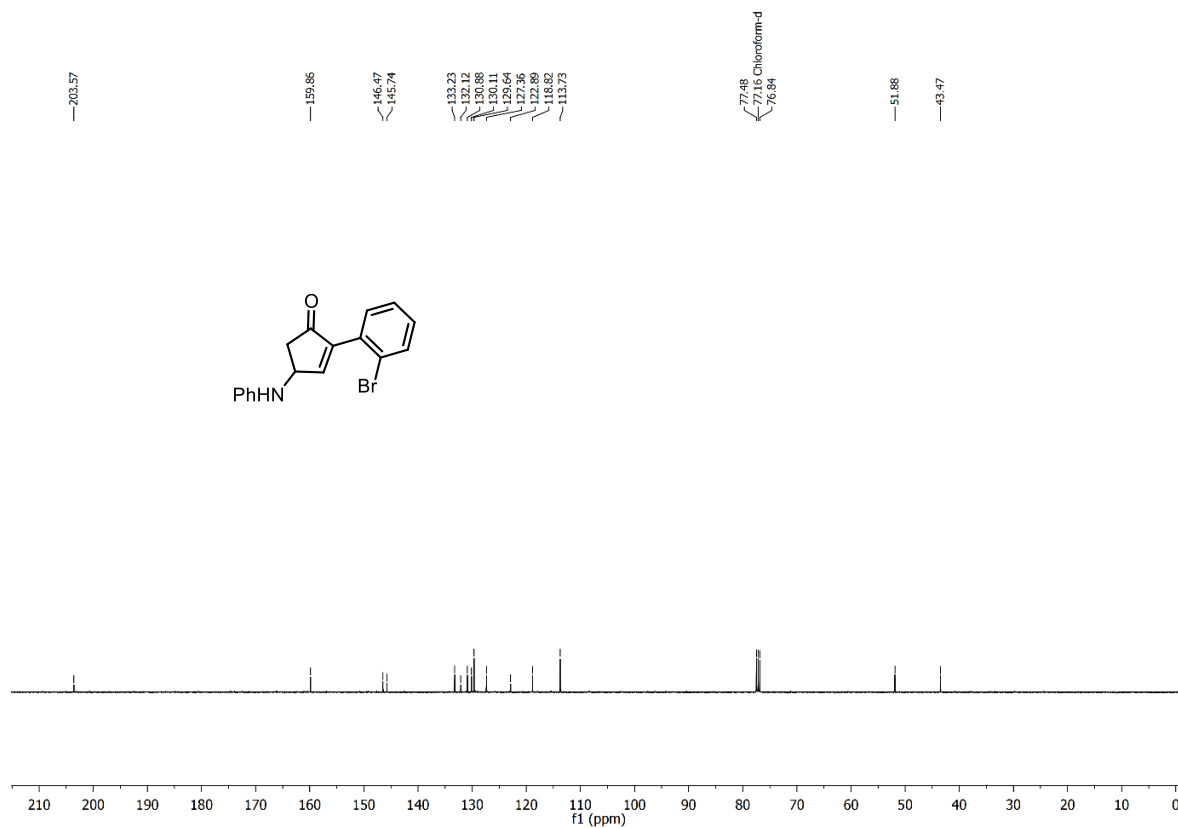

$^1\text{H}$  NMR spectra at 400MHz and  $^{13}\text{C}$  NMR spectra at 100MHz in  $\text{CDCl}_3$ (3)

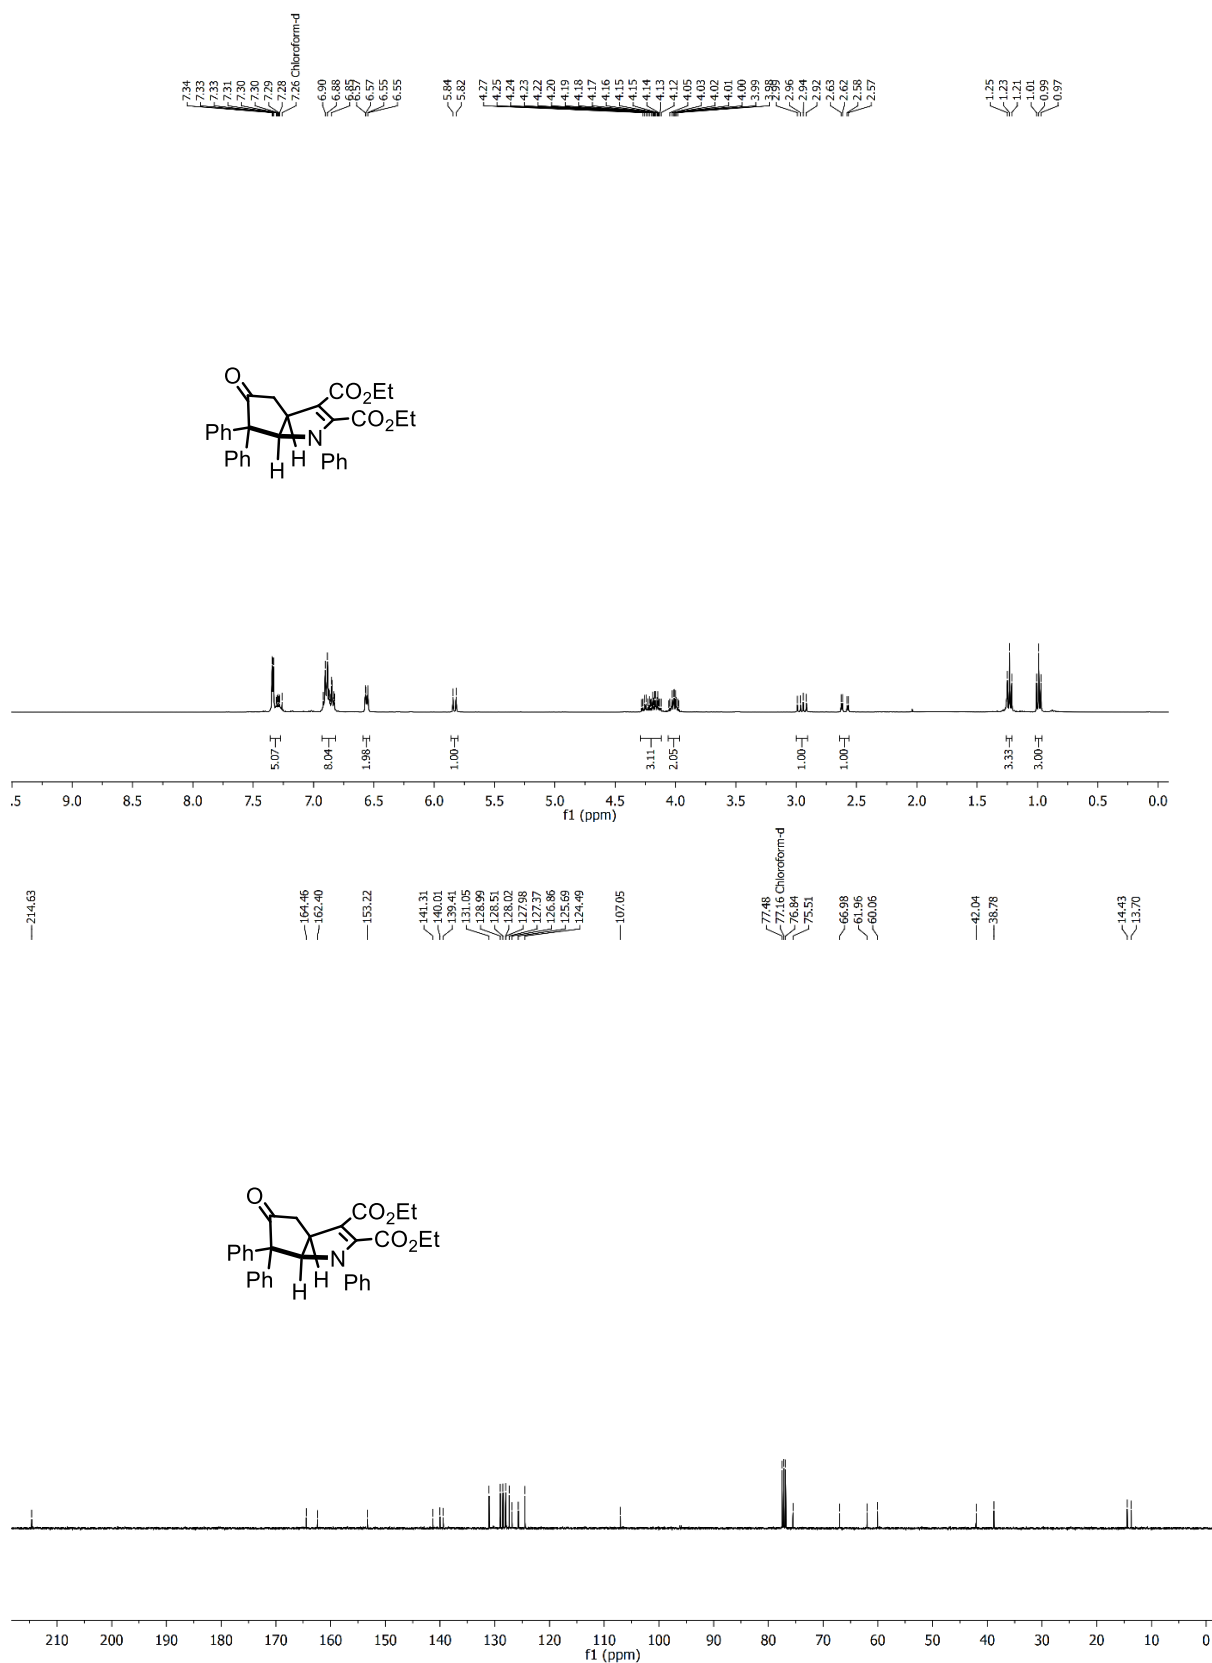

$^1\text{H}$  NMR spectra at 400MHz and  $^{13}\text{C}$  NMR spectra at 100MHz in  $\text{CDCl}_3$ (4)

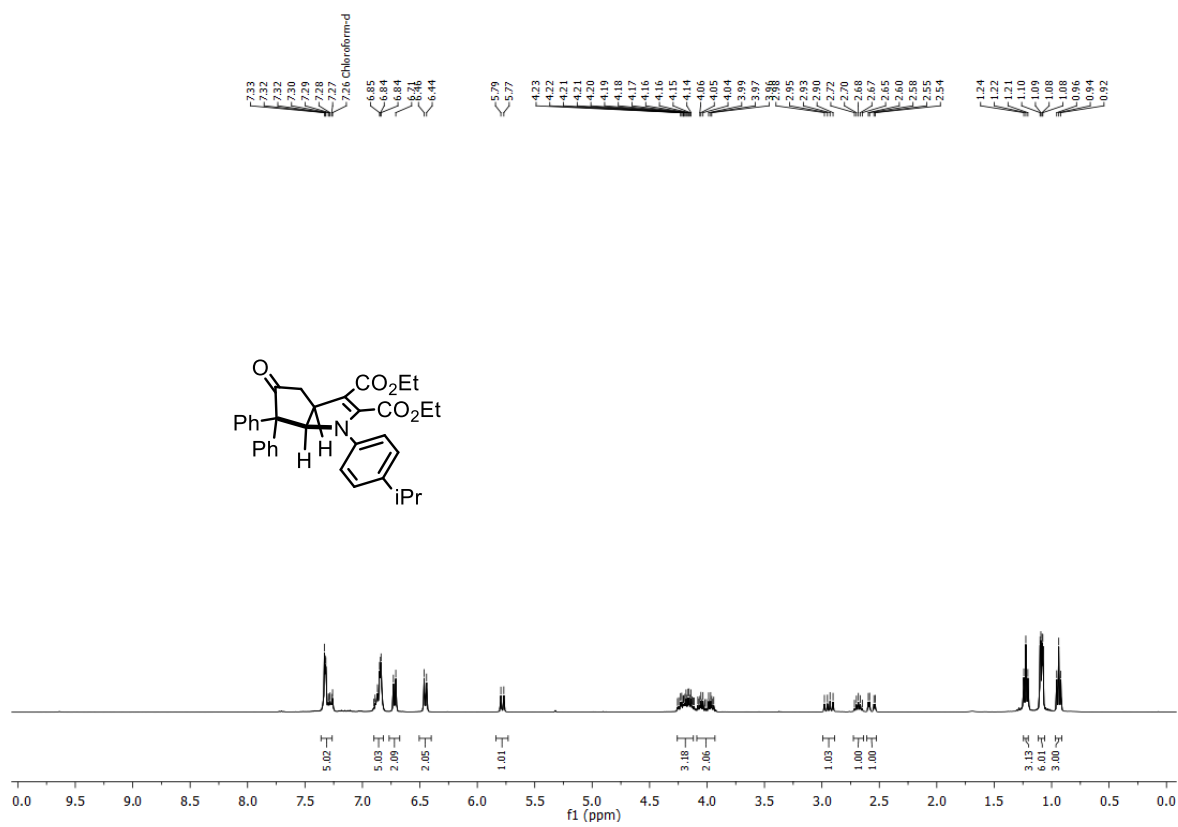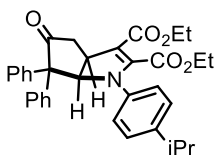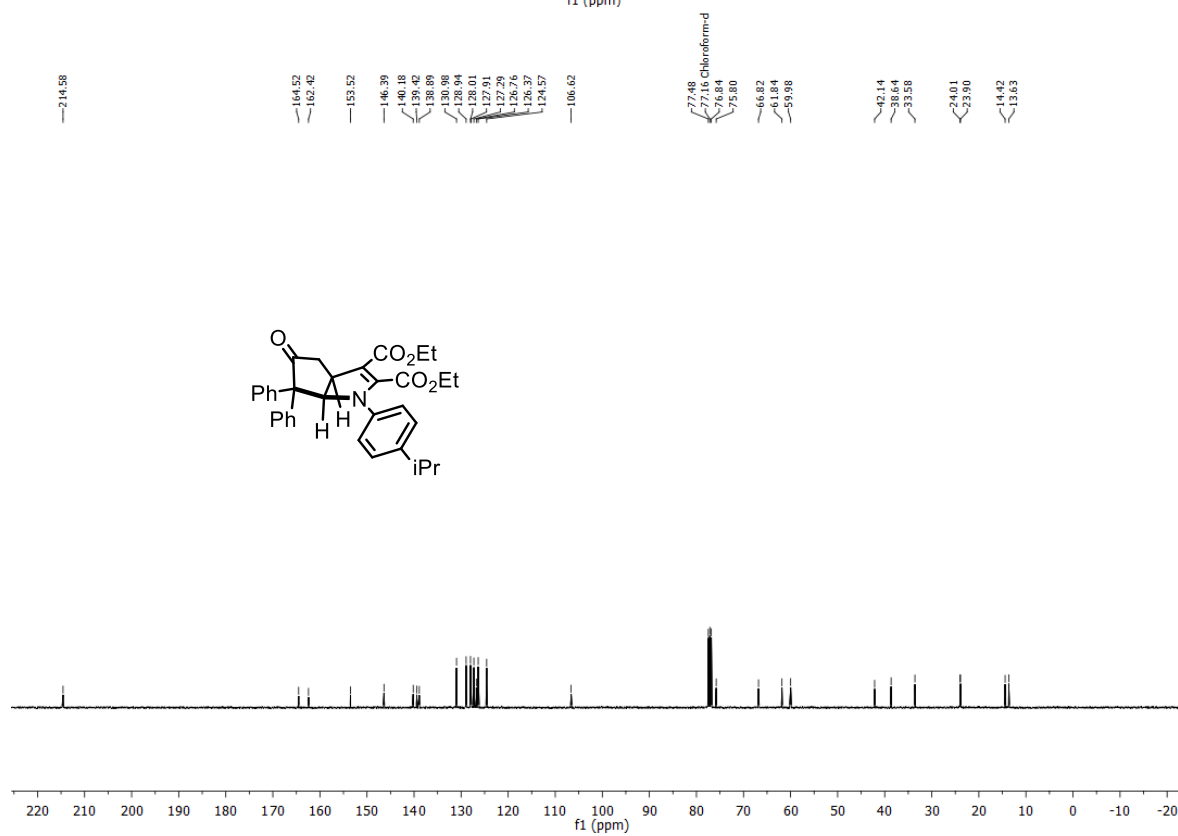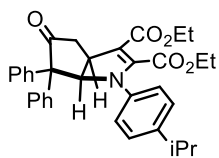

$^1\text{H}$  NMR spectra at 400MHz and  $^{13}\text{C}$  NMR spectra at 100MHz in  $\text{CDCl}_3$ (5)

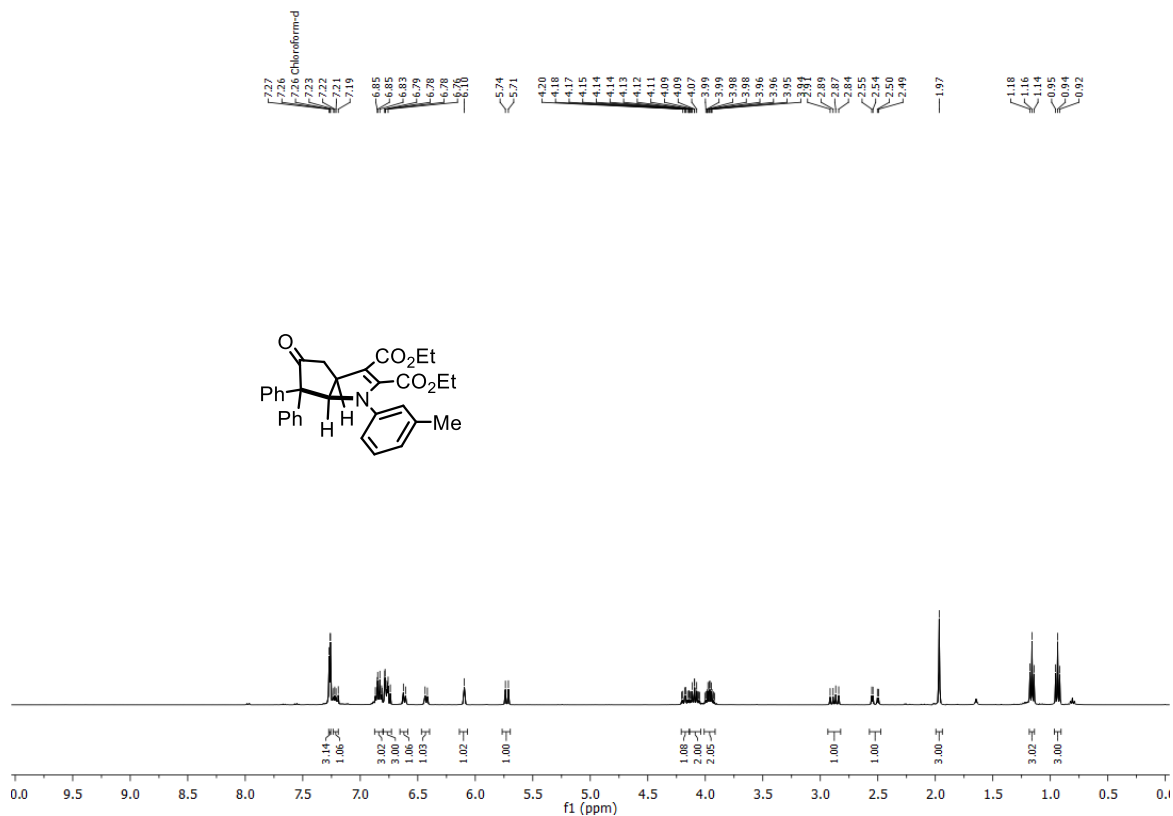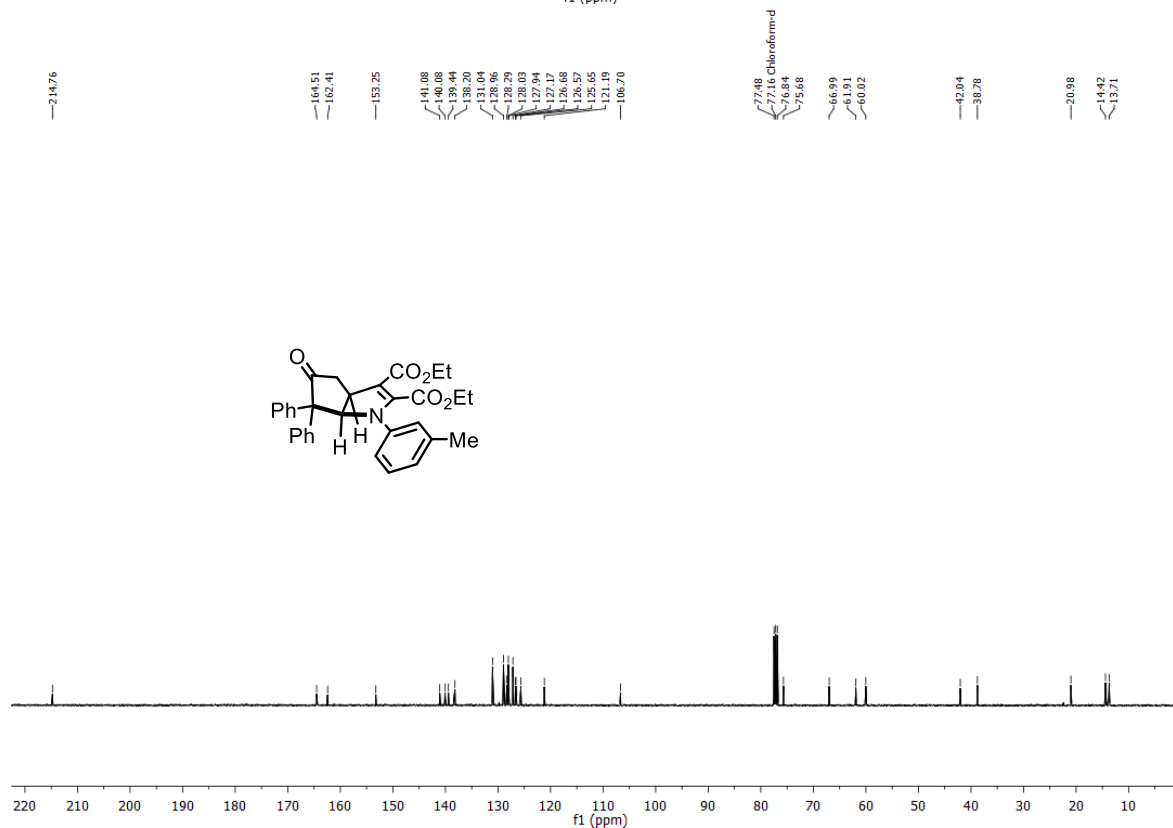

$^1\text{H}$  NMR spectra at 400MHz and  $^{13}\text{C}$  NMR spectra at 100MHz in  $\text{CDCl}_3$ (6)

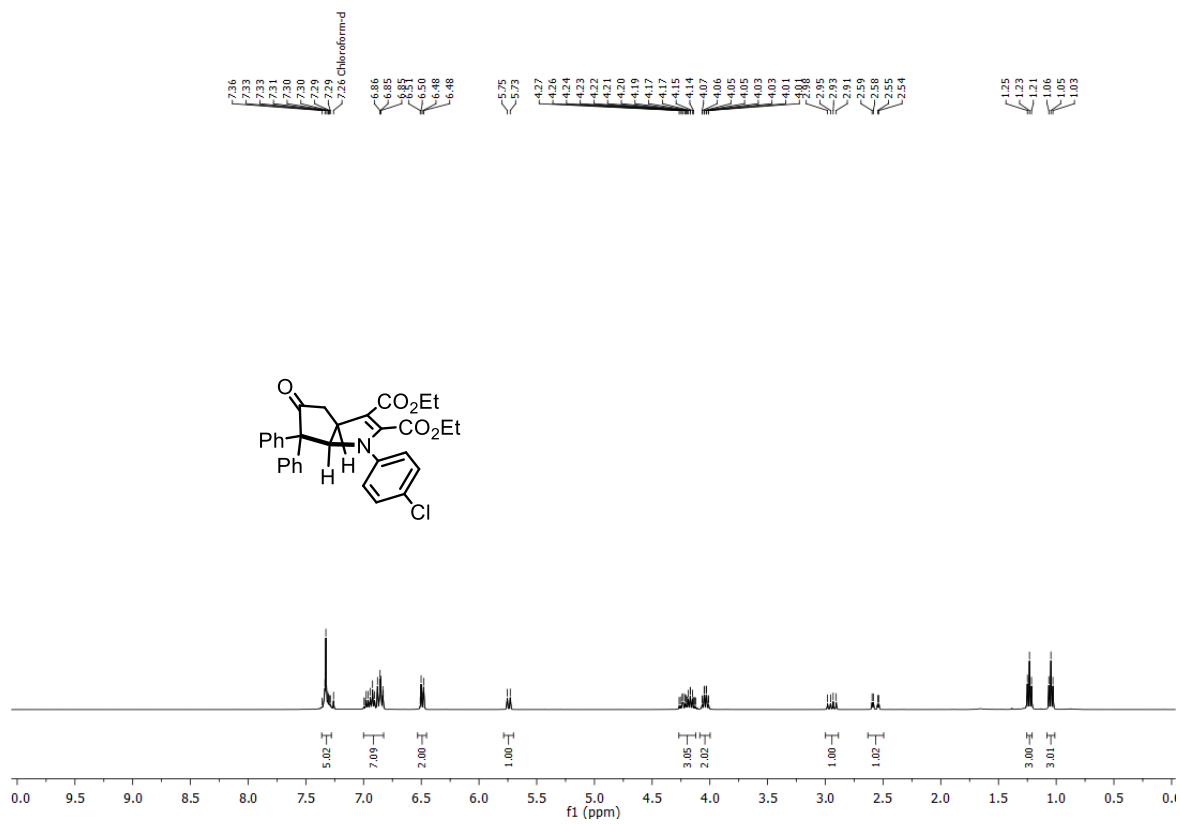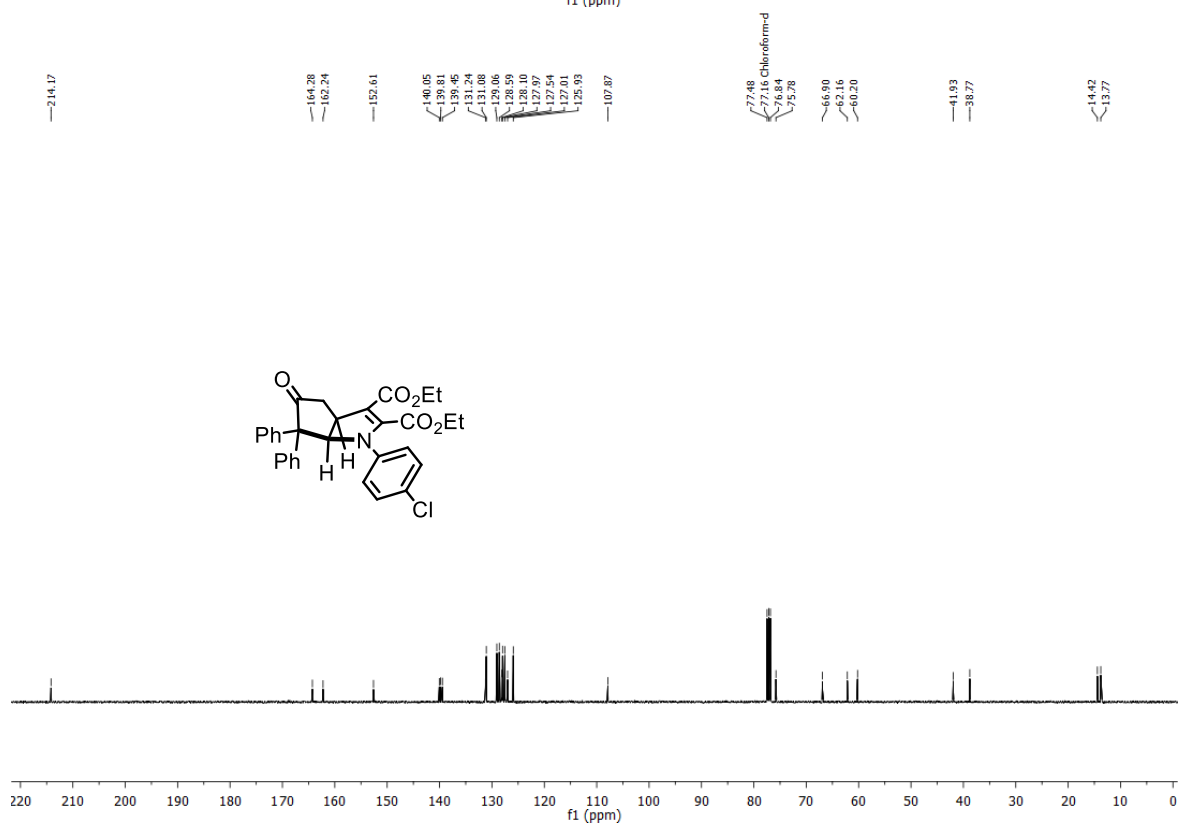

$^1\text{H}$  NMR spectra at 800MHz and  $^{13}\text{C}$  NMR spectra at 200MHz in  $\text{CDCl}_3$ (7)

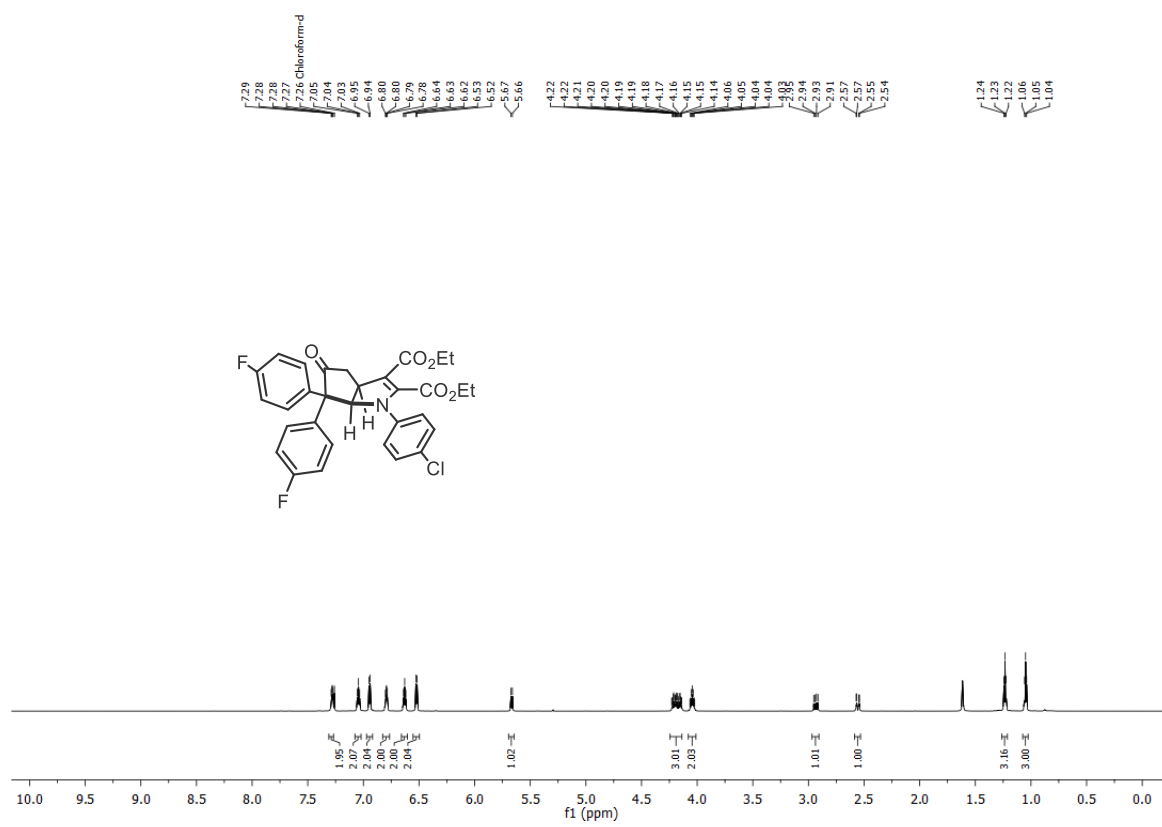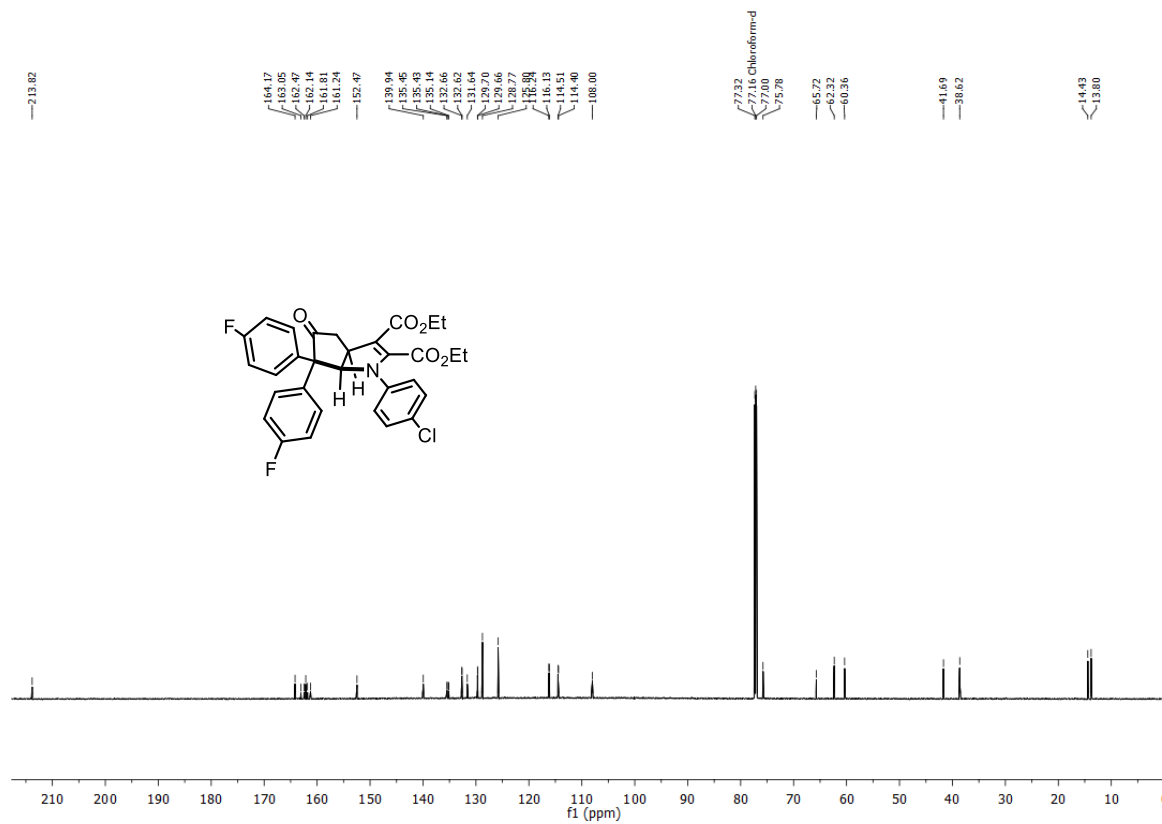

<sup>1</sup>H NMR spectra at 400MHz and <sup>13</sup>C NMR spectra at 100MHz in CDCl<sub>3</sub>(**8**)

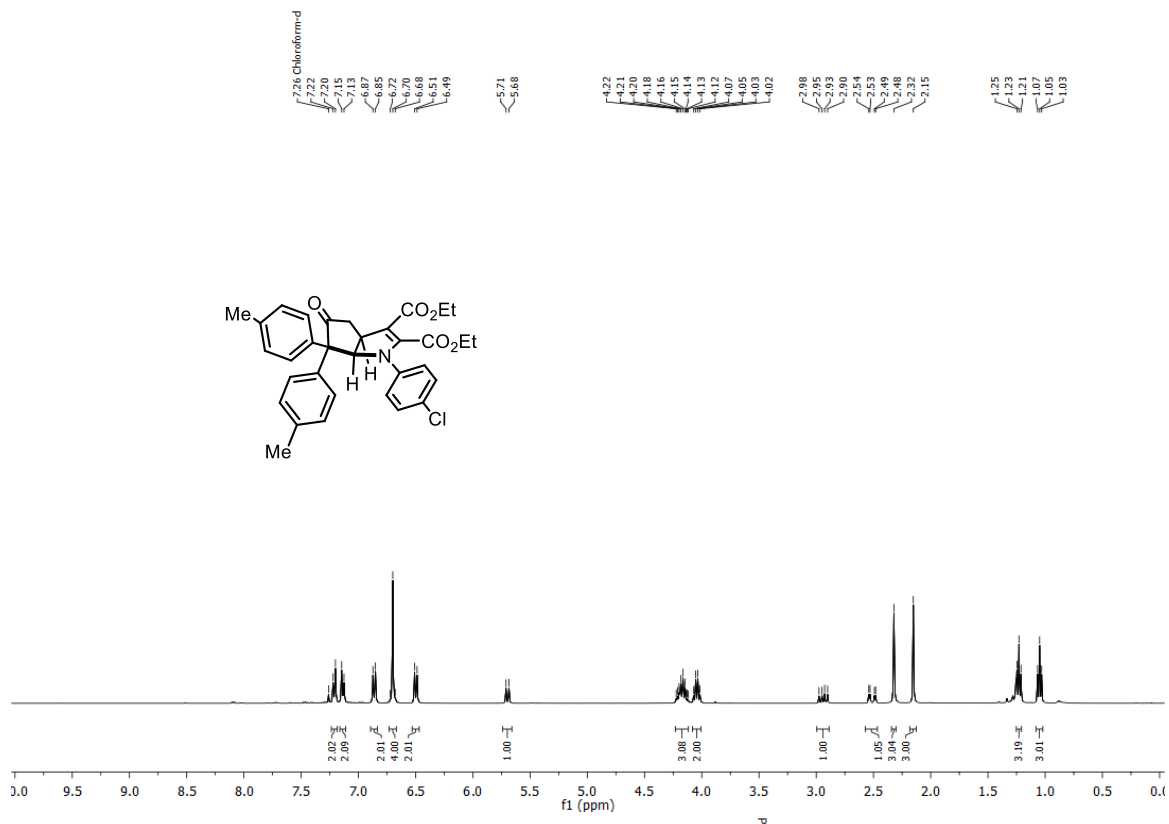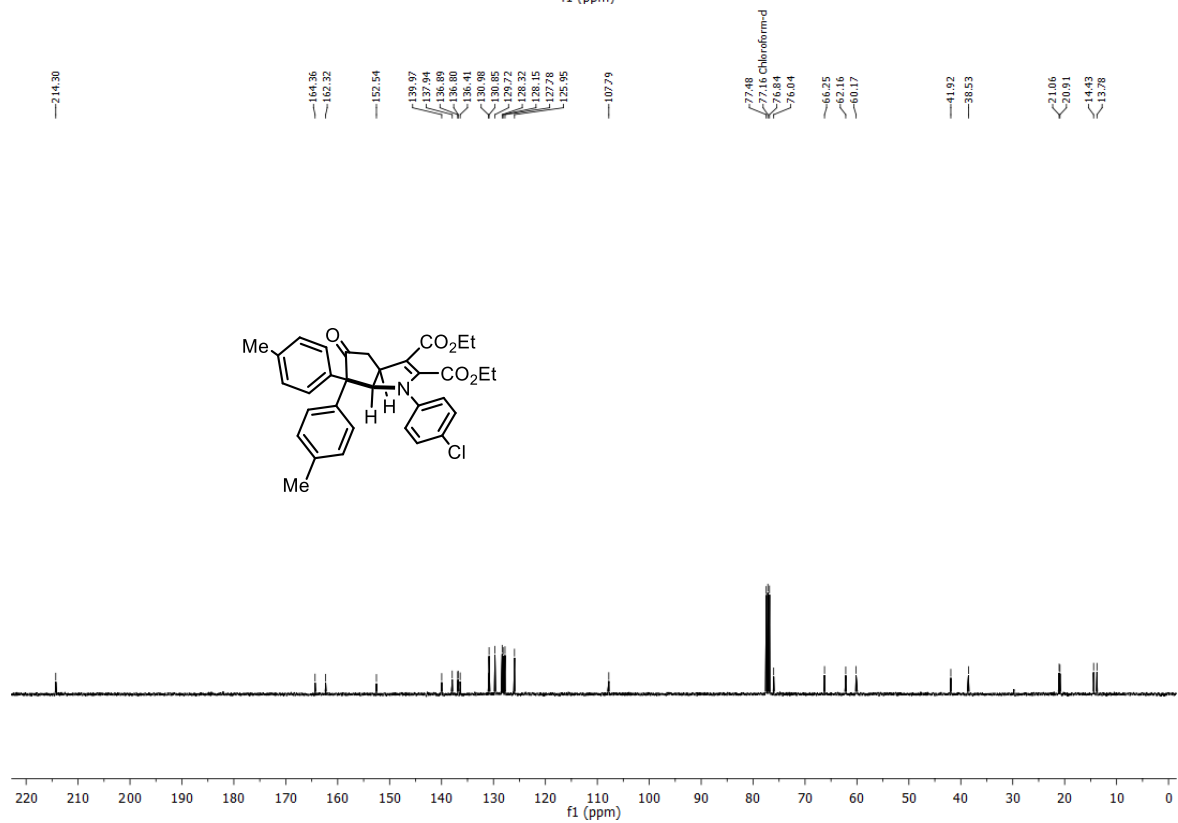



$^1\text{H}$  NMR spectra at 400MHz and  $^{13}\text{C}$  NMR spectra at 100MHz in  $\text{CDCl}_3$ (9)

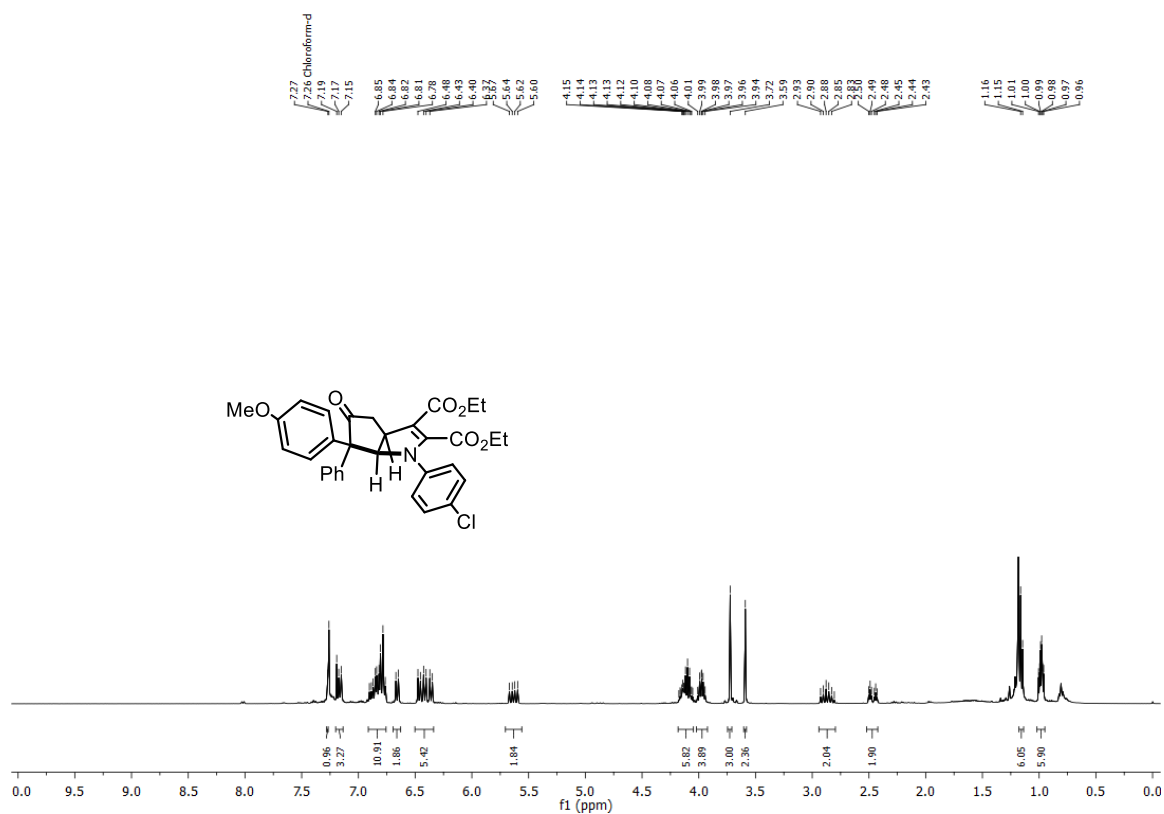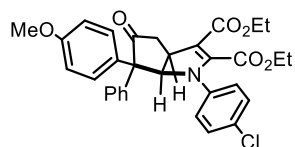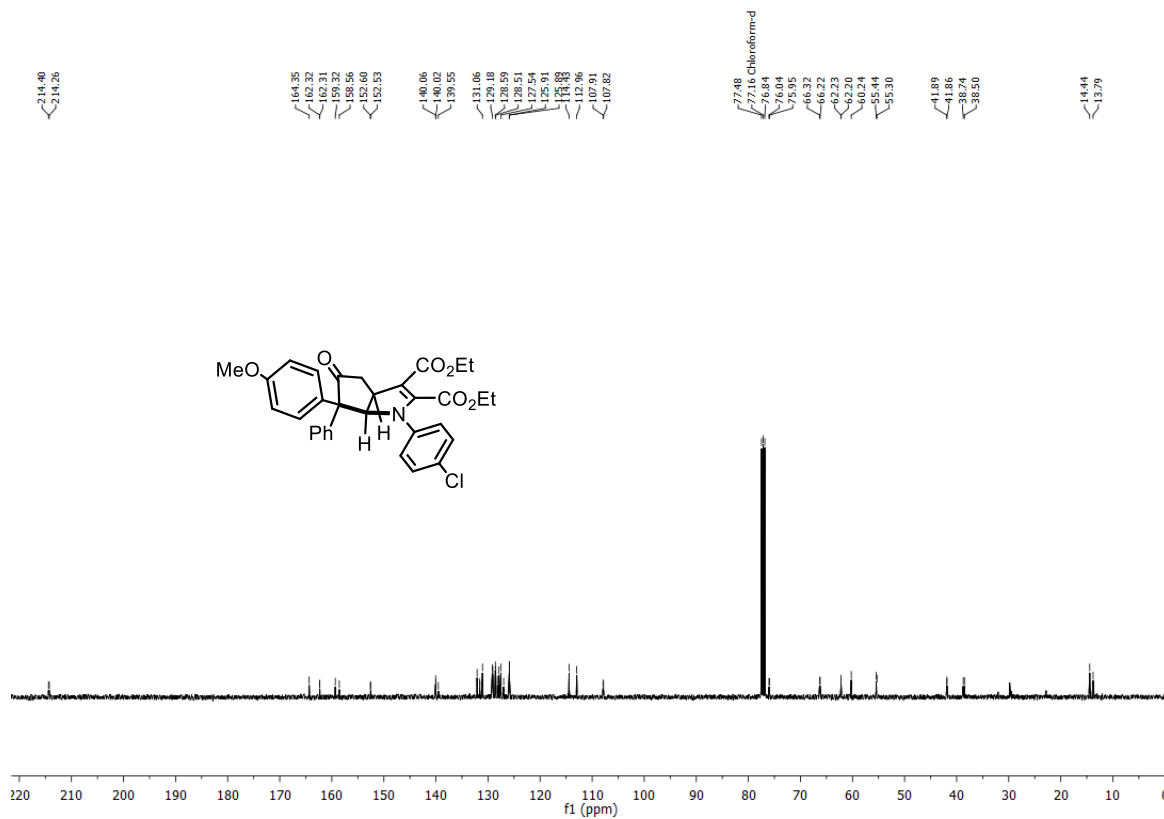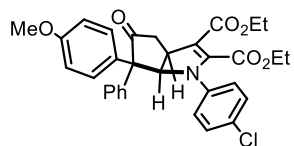

<sup>1</sup>H NMR spectra at 400MHz and <sup>13</sup>C NMR spectra at 100MHz in CDCl<sub>3</sub>(10)

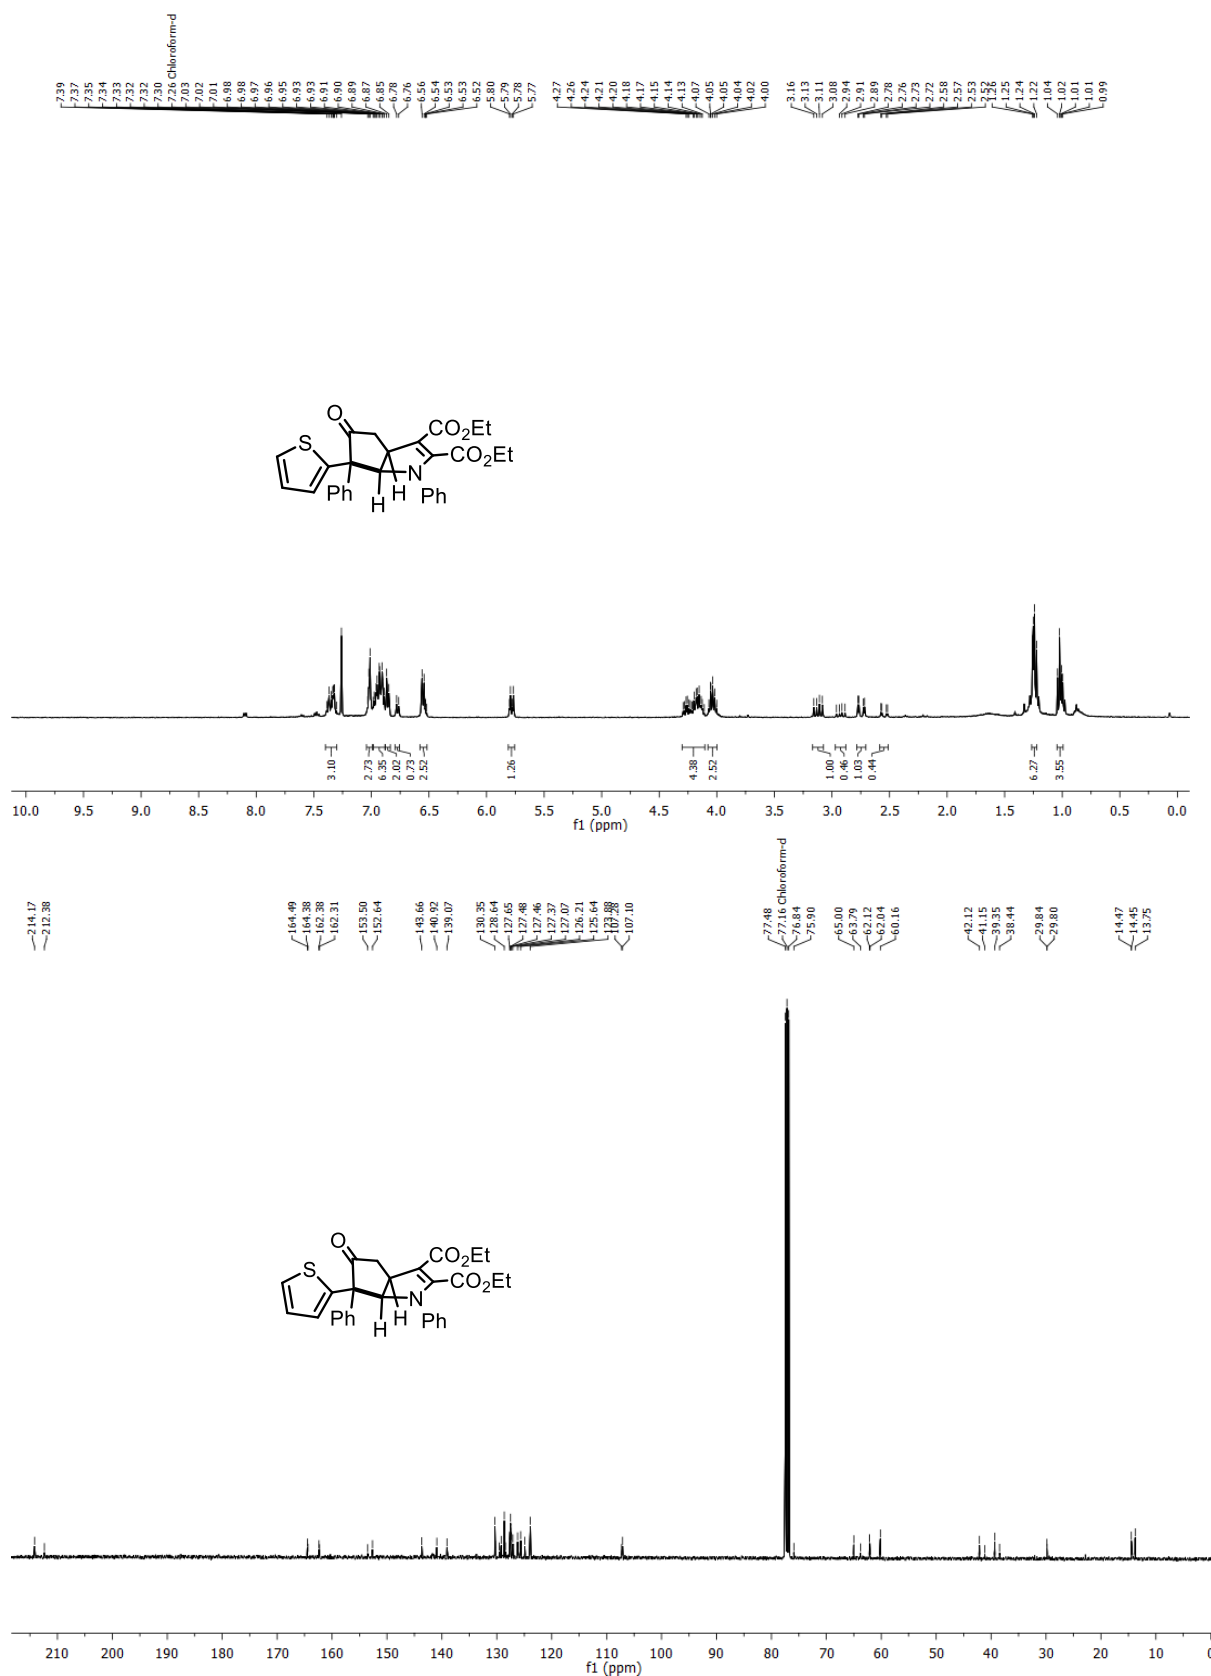

$^1\text{H}$  NMR spectra at 400MHz and  $^{13}\text{C}$  NMR spectra at 100MHz in  $\text{CDCl}_3$ (11)

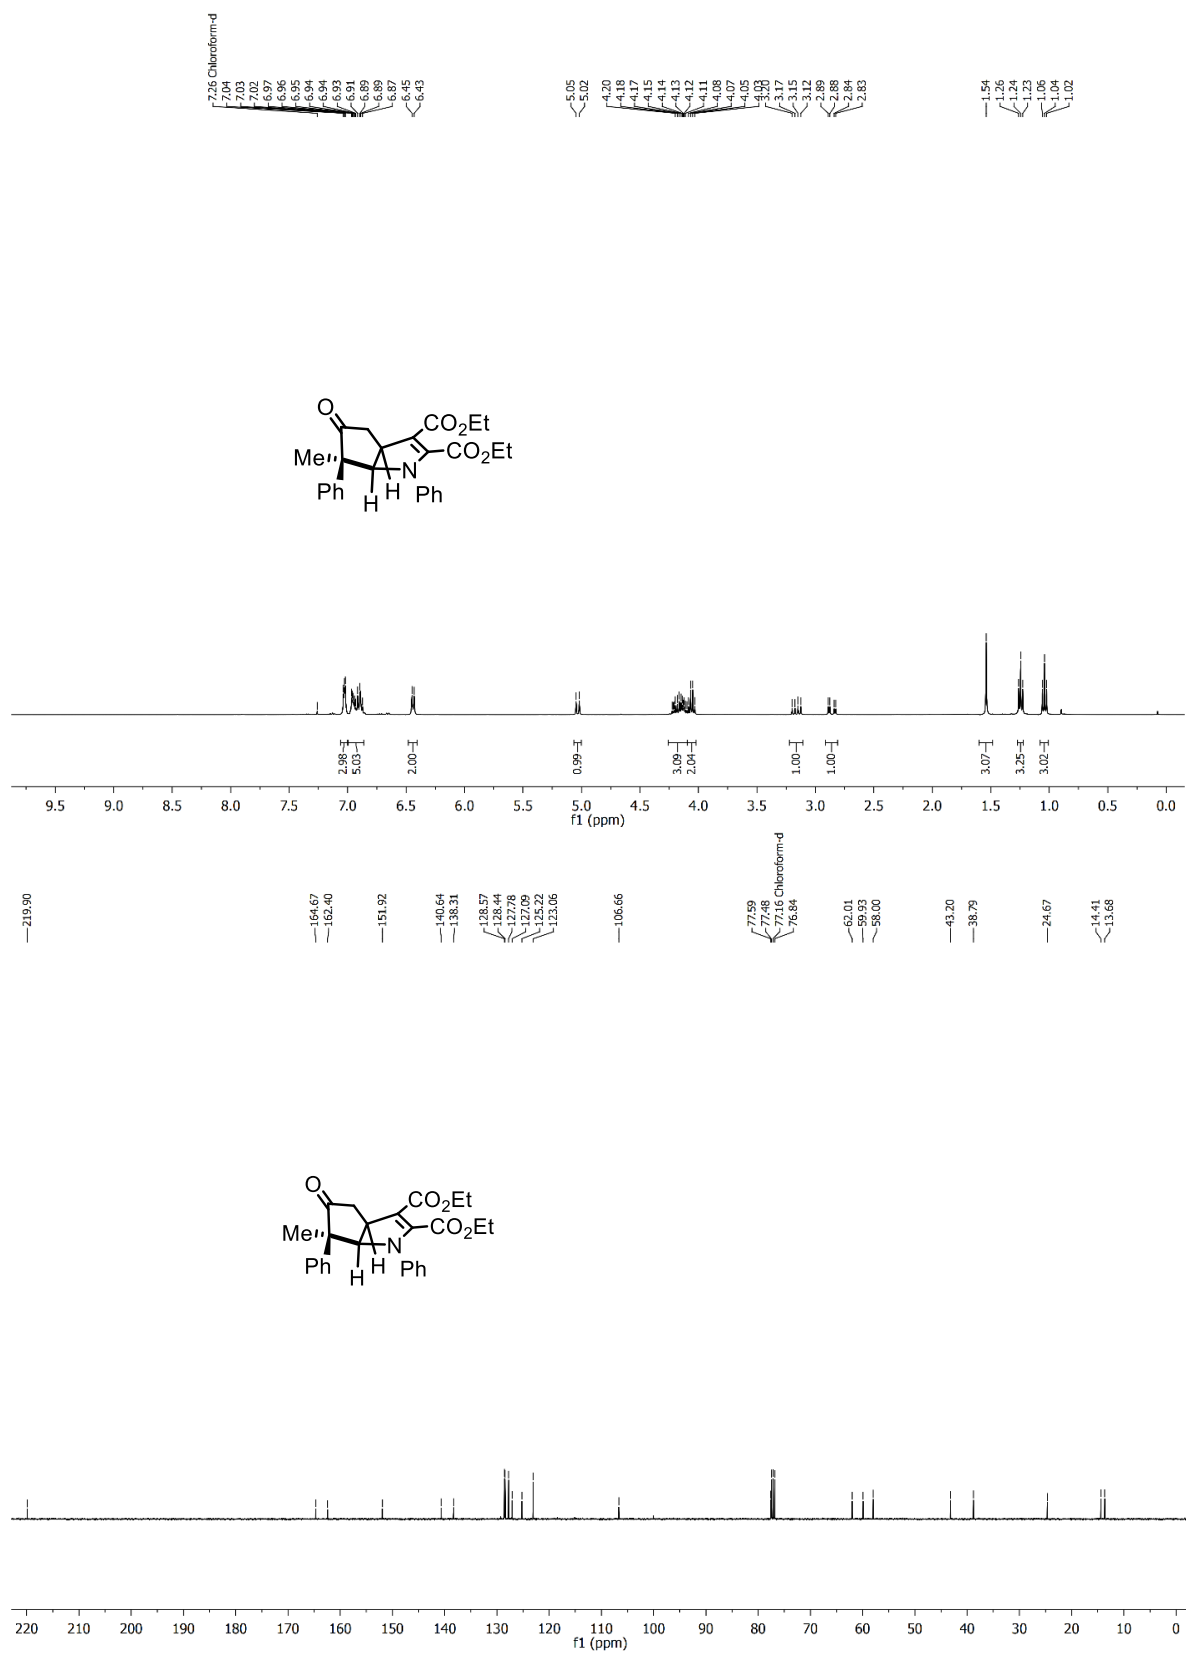

$^1\text{H}$  spectra at 400MHz and  $^{13}\text{C}$  NMR spectra at 100MHz in  $\text{CDCl}_3$  (12)

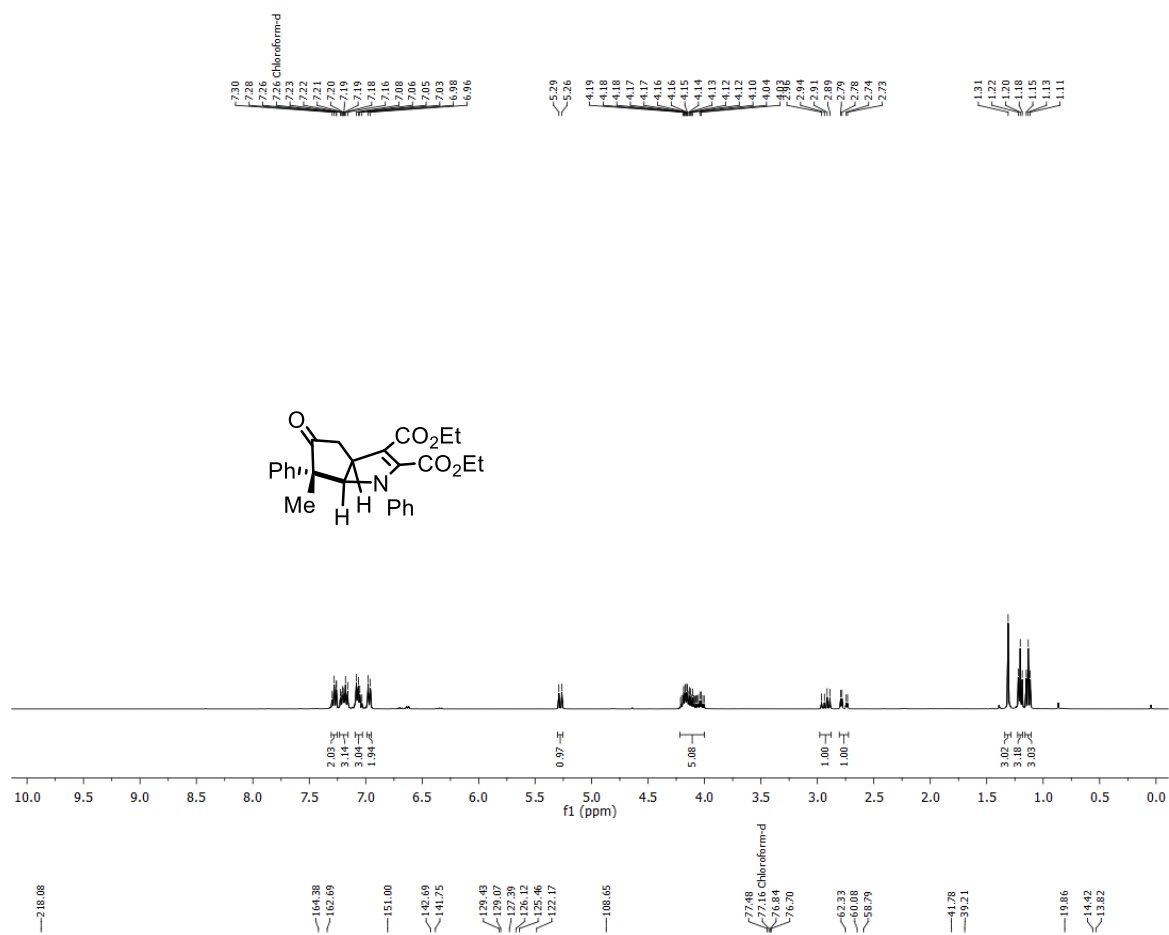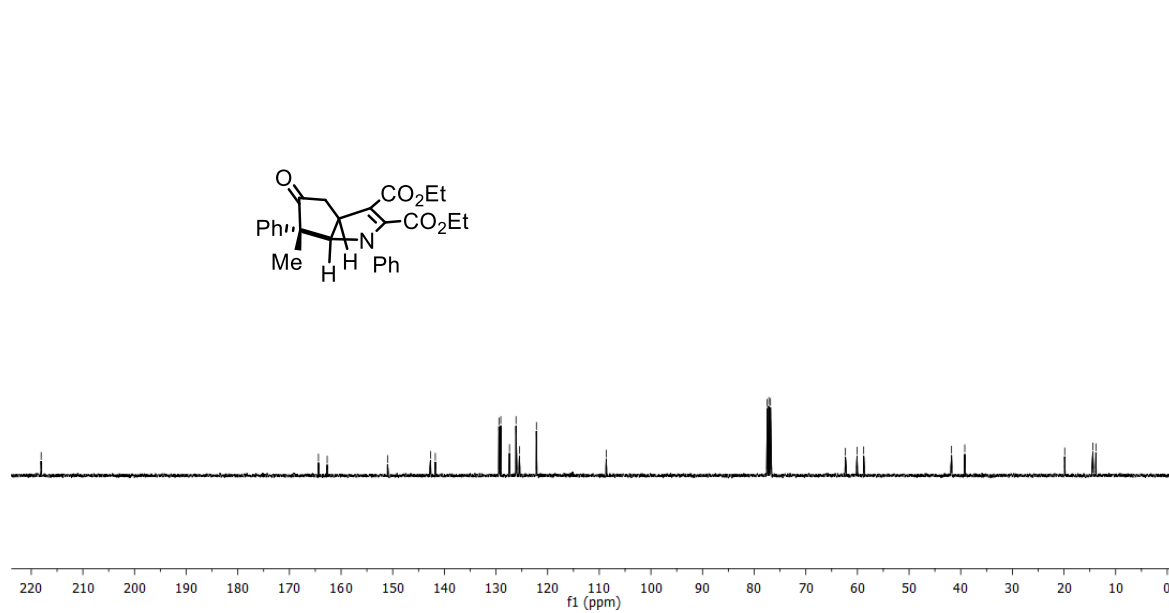

$^1\text{H}$  NMR spectra at 400MHz and  $^{13}\text{C}$  NMR spectra at 100MHz in  $\text{CDCl}_3$  (13)

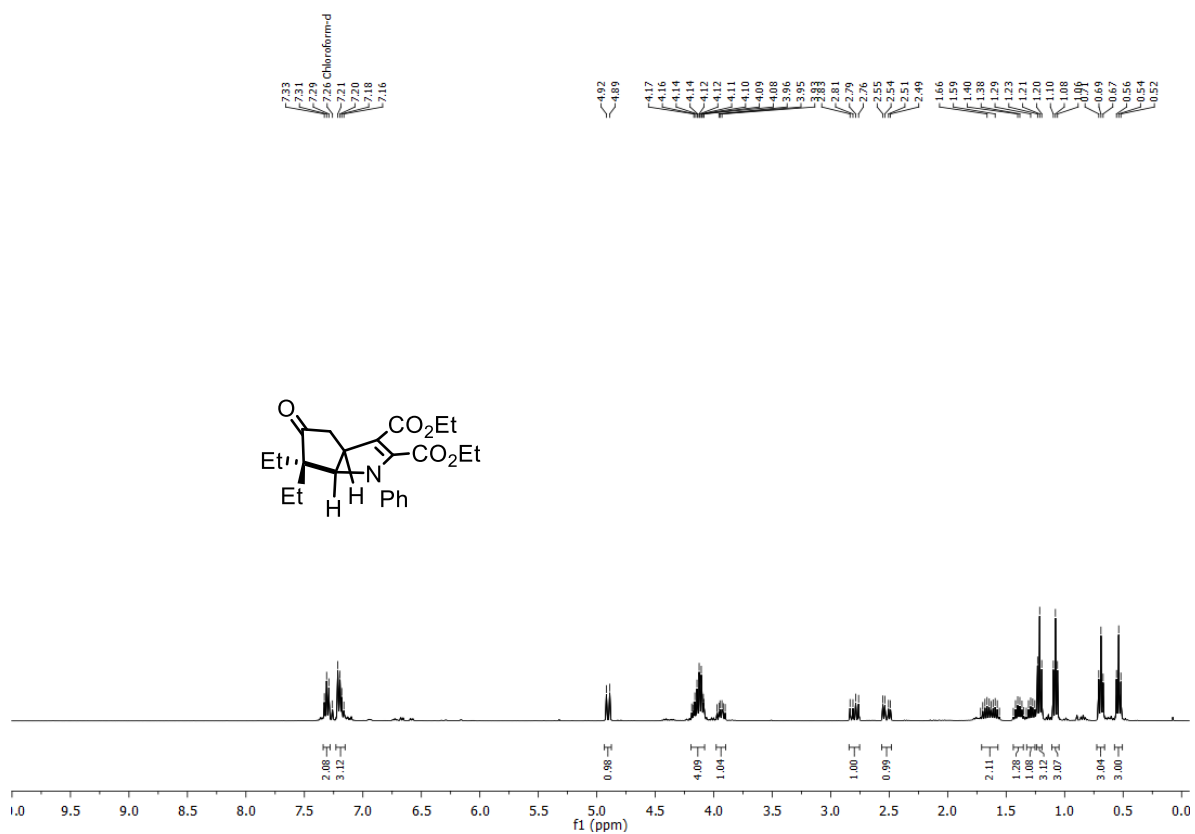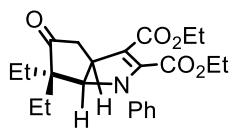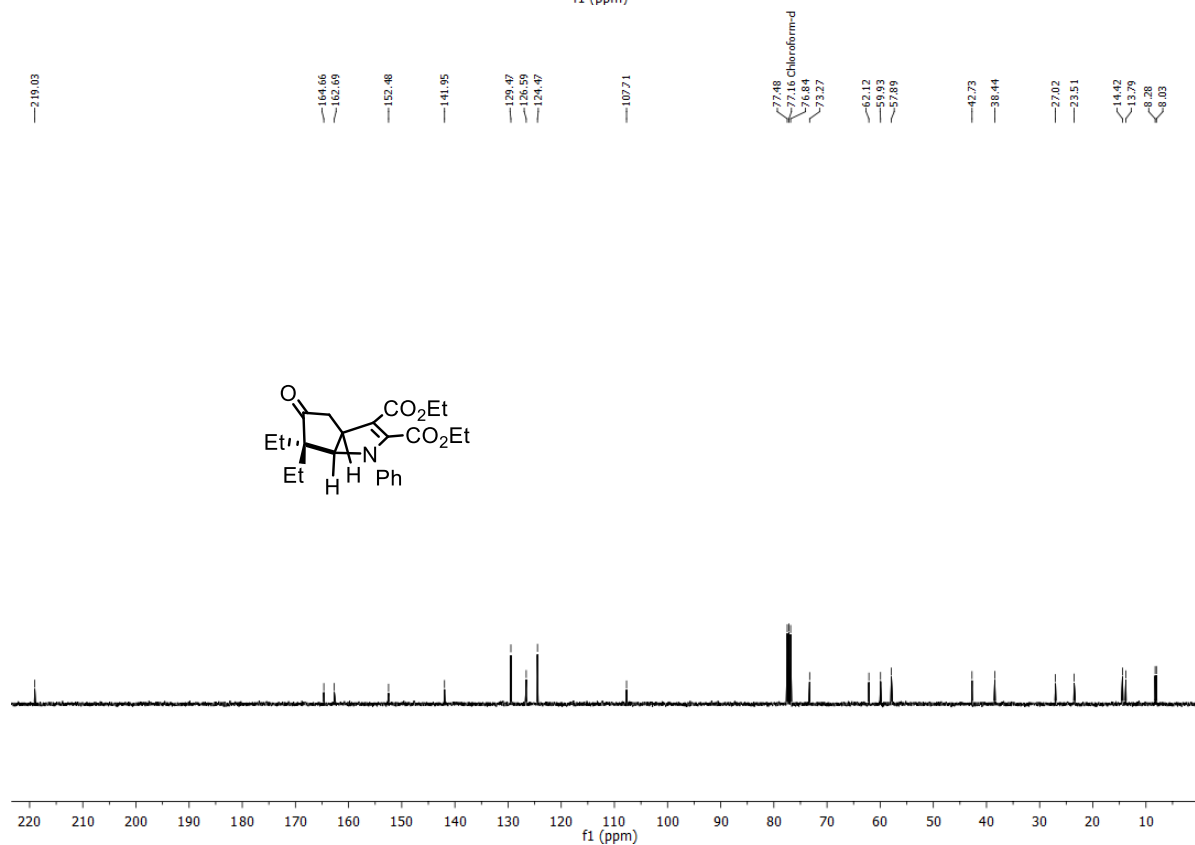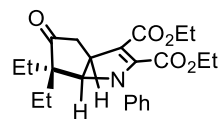

$^1\text{H}$  NMR spectra at 400MHz and  $^{13}\text{C}$  NMR spectra at 100MHz in  $\text{CDCl}_3$  (**14**)

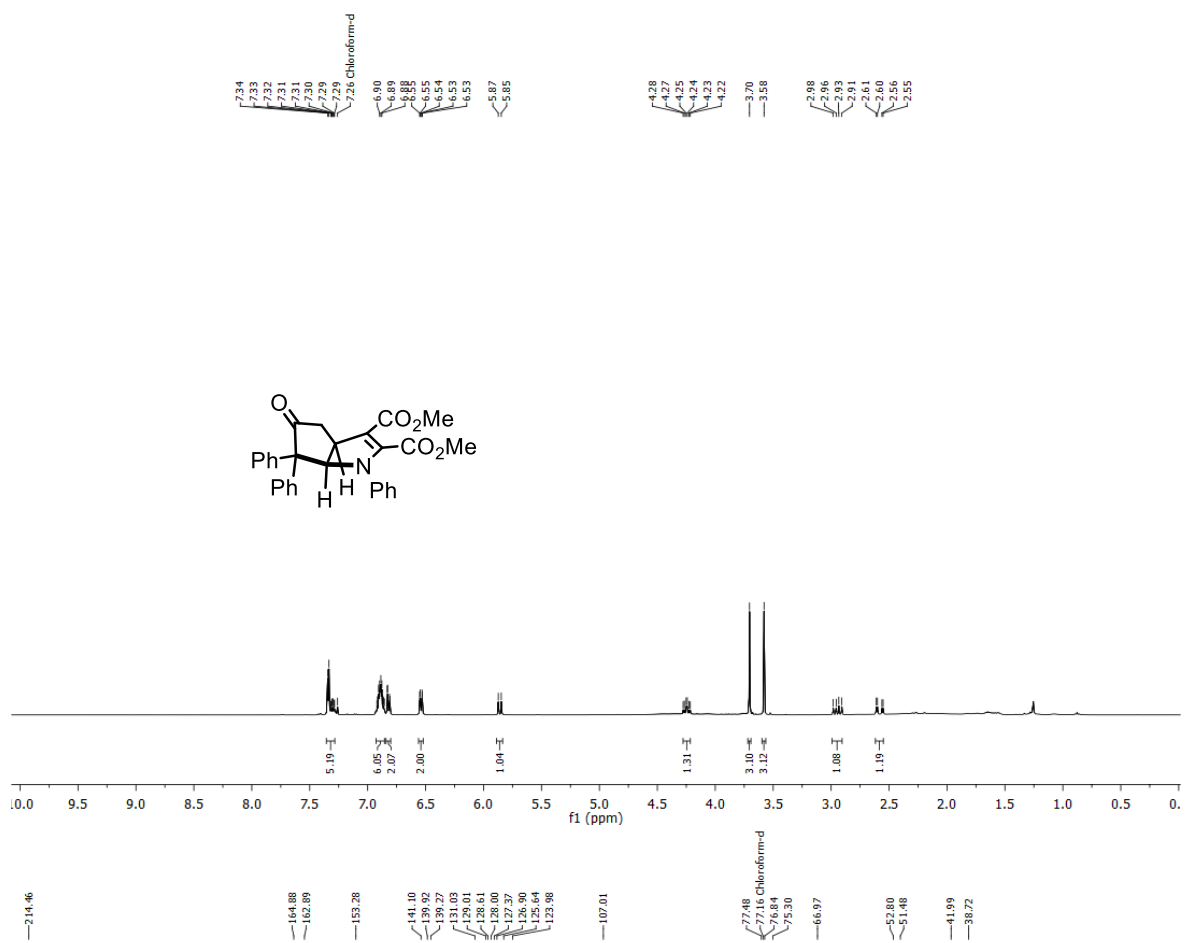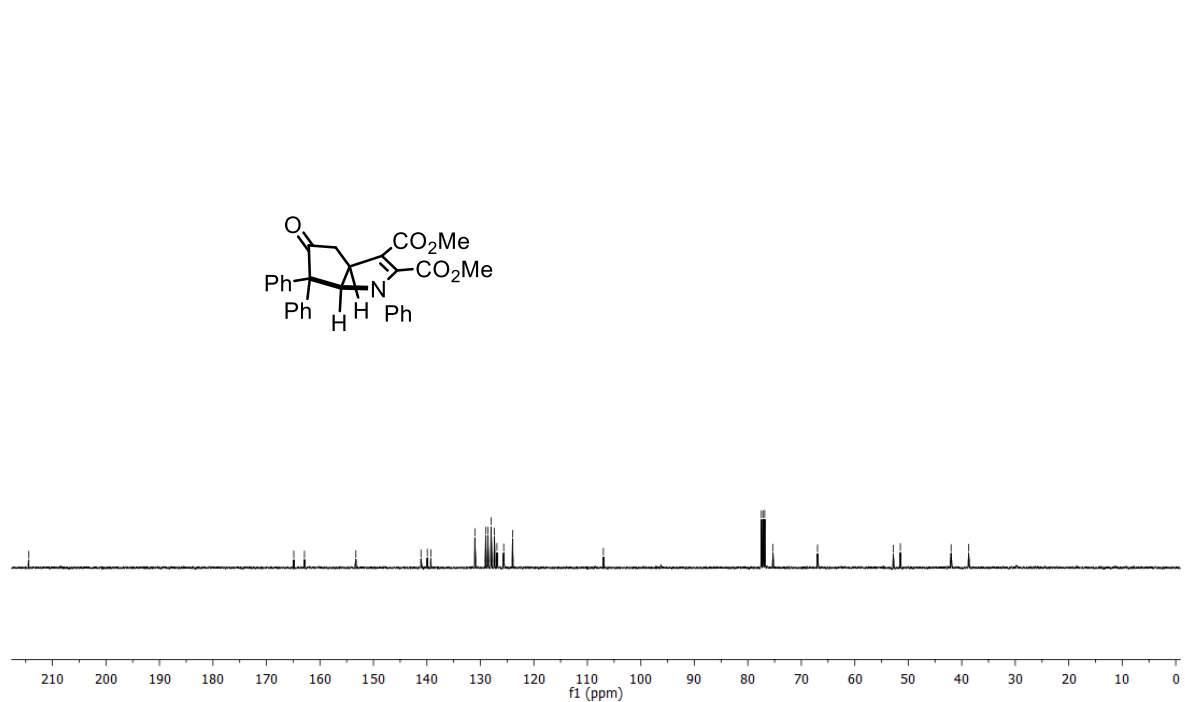

$^1\text{H}$  NMR spectra at 800MHz and  $^{13}\text{C}$  NMR spectra at 200MHz in  $\text{CDCl}_3$  (15)

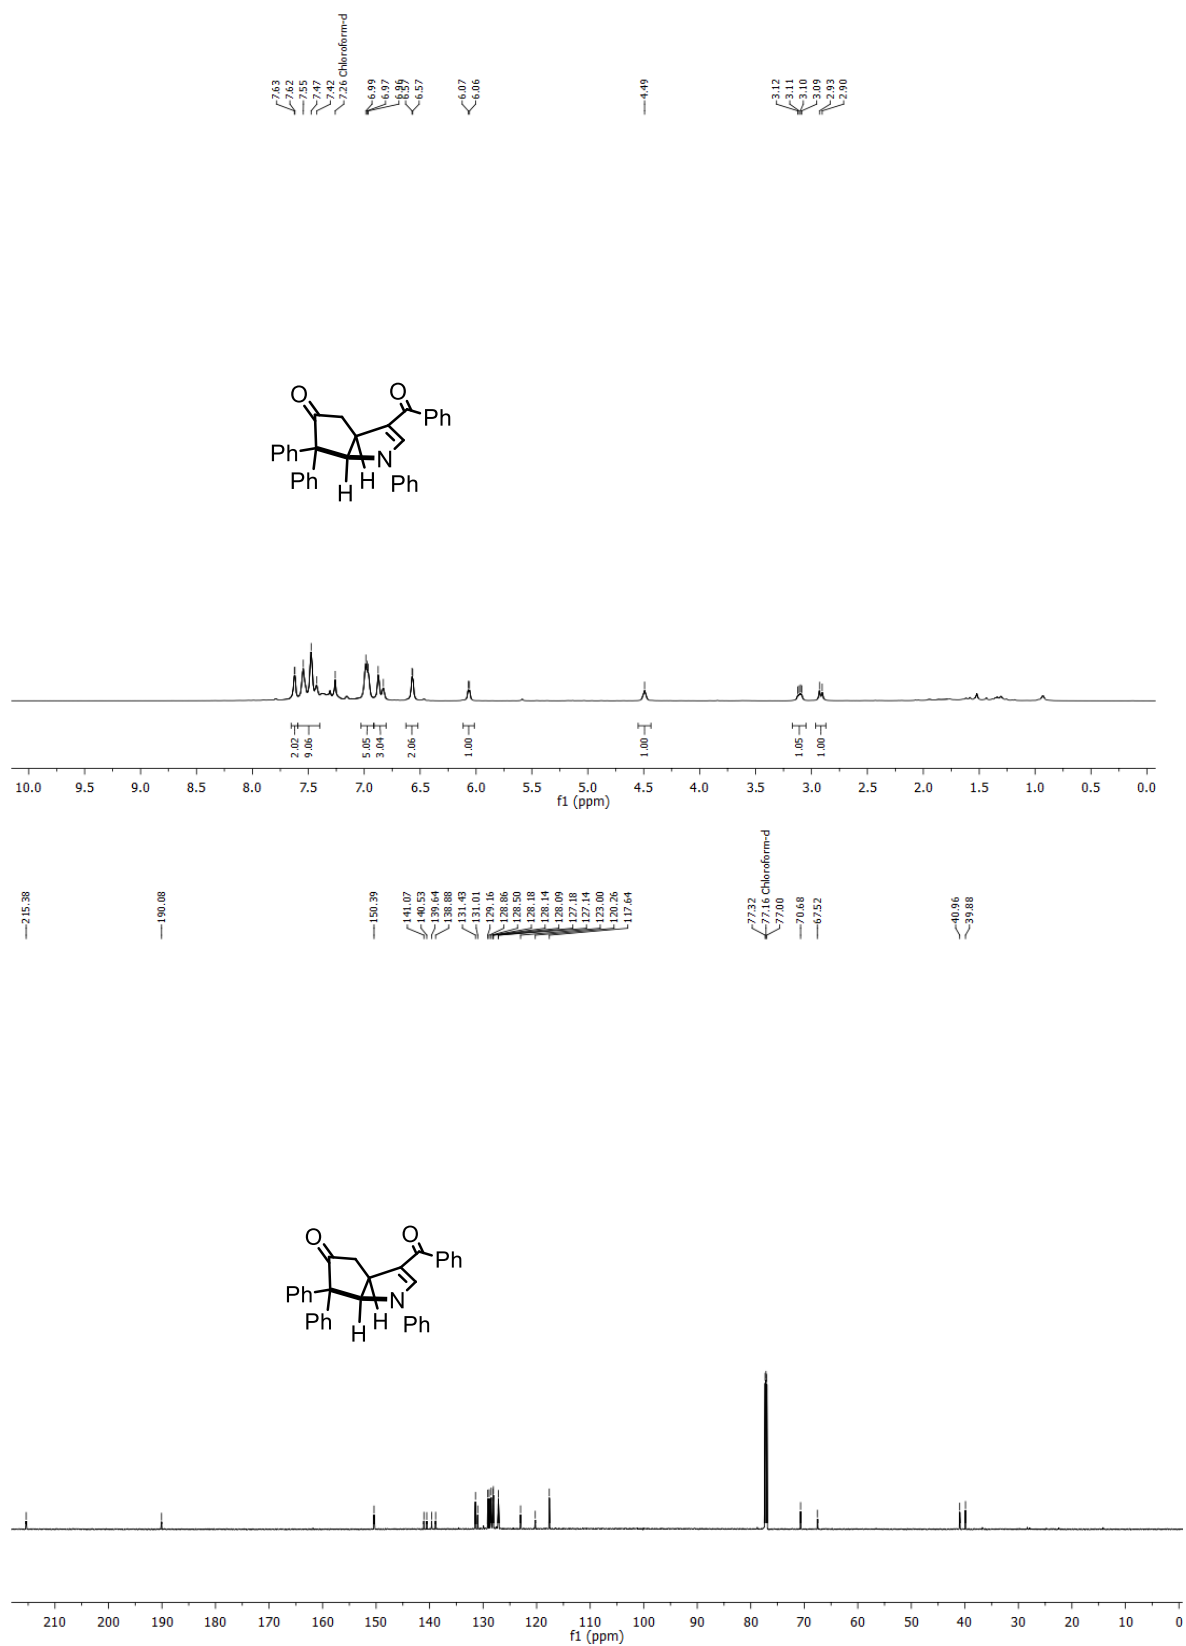

$^1\text{H}$  NMR spectra at 400MHz and  $^{13}\text{C}$  NMR spectra at 100MHz in  $\text{CDCl}_3$  (16)

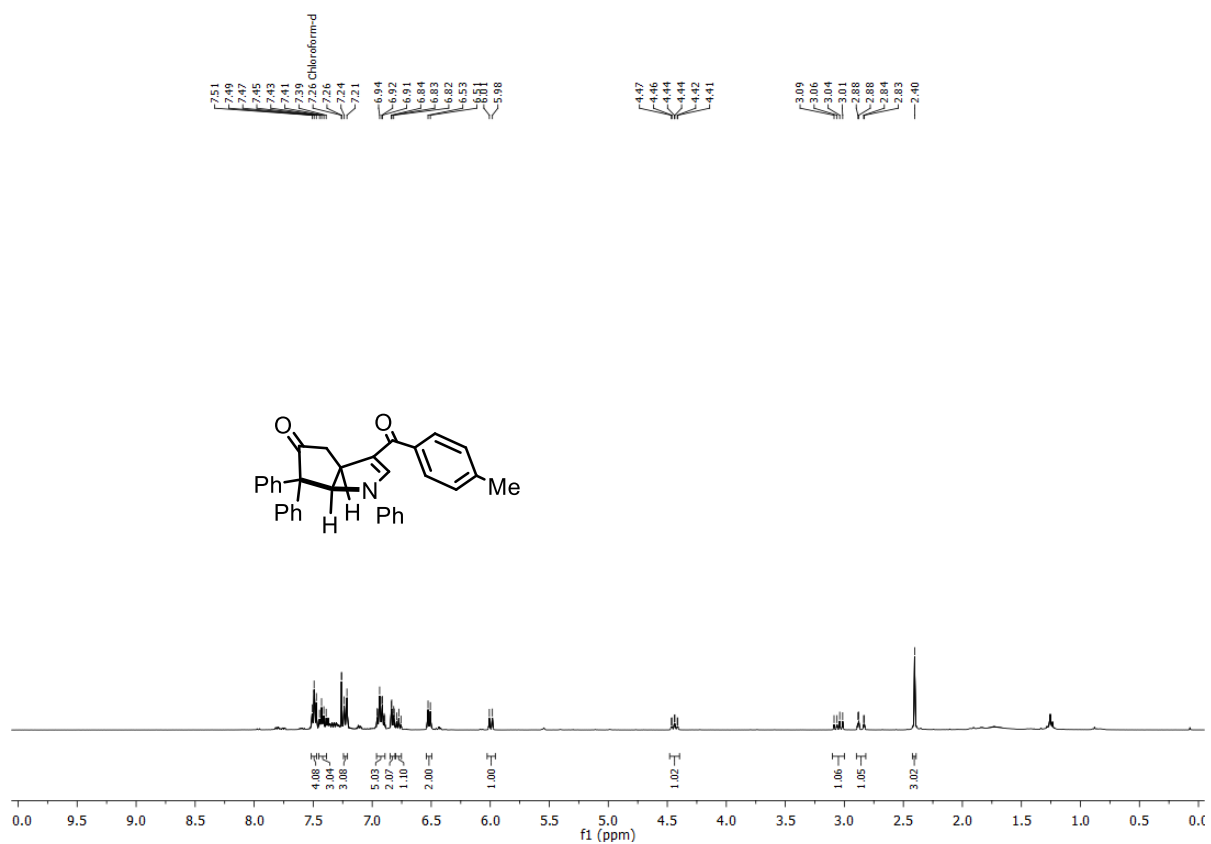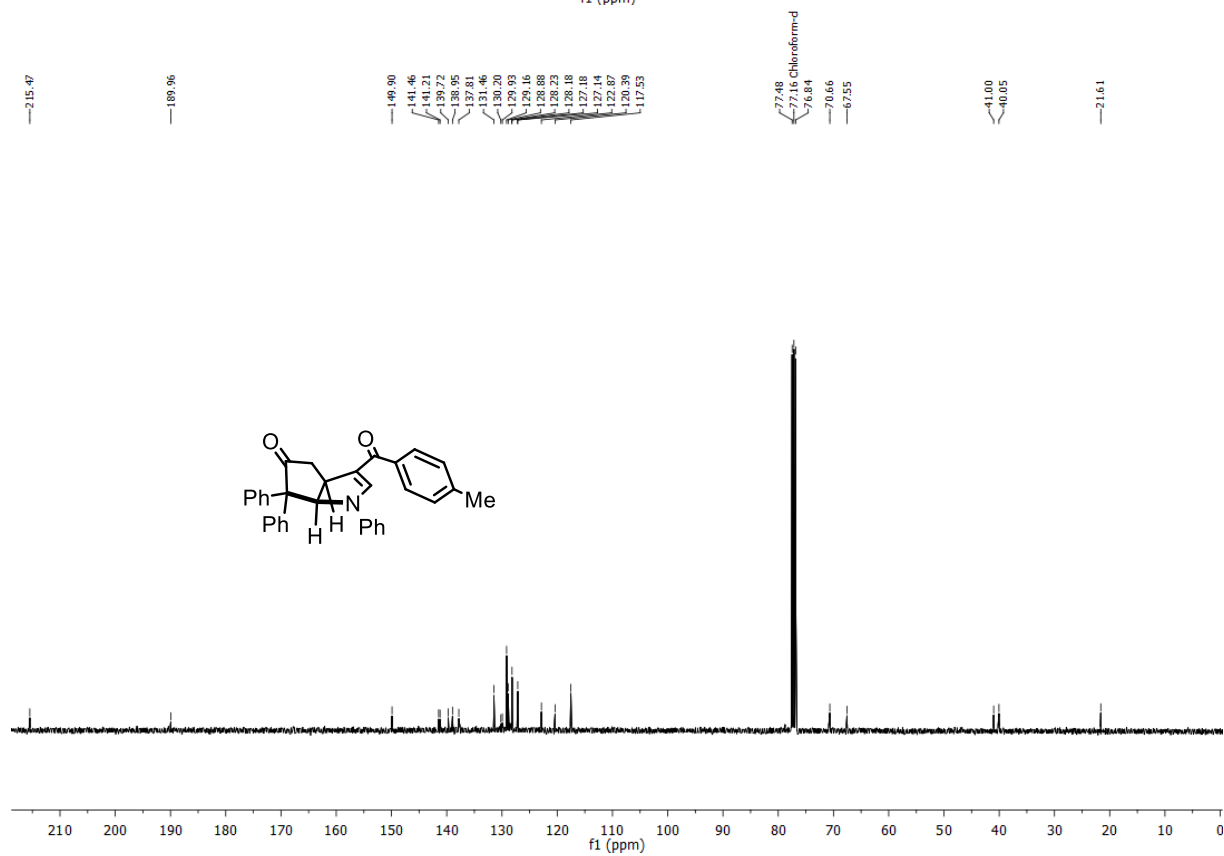



<sup>1</sup>H NMR spectra at 400MHz and <sup>13</sup>C NMR spectra at 100MHz in CDCl<sub>3</sub>(17)

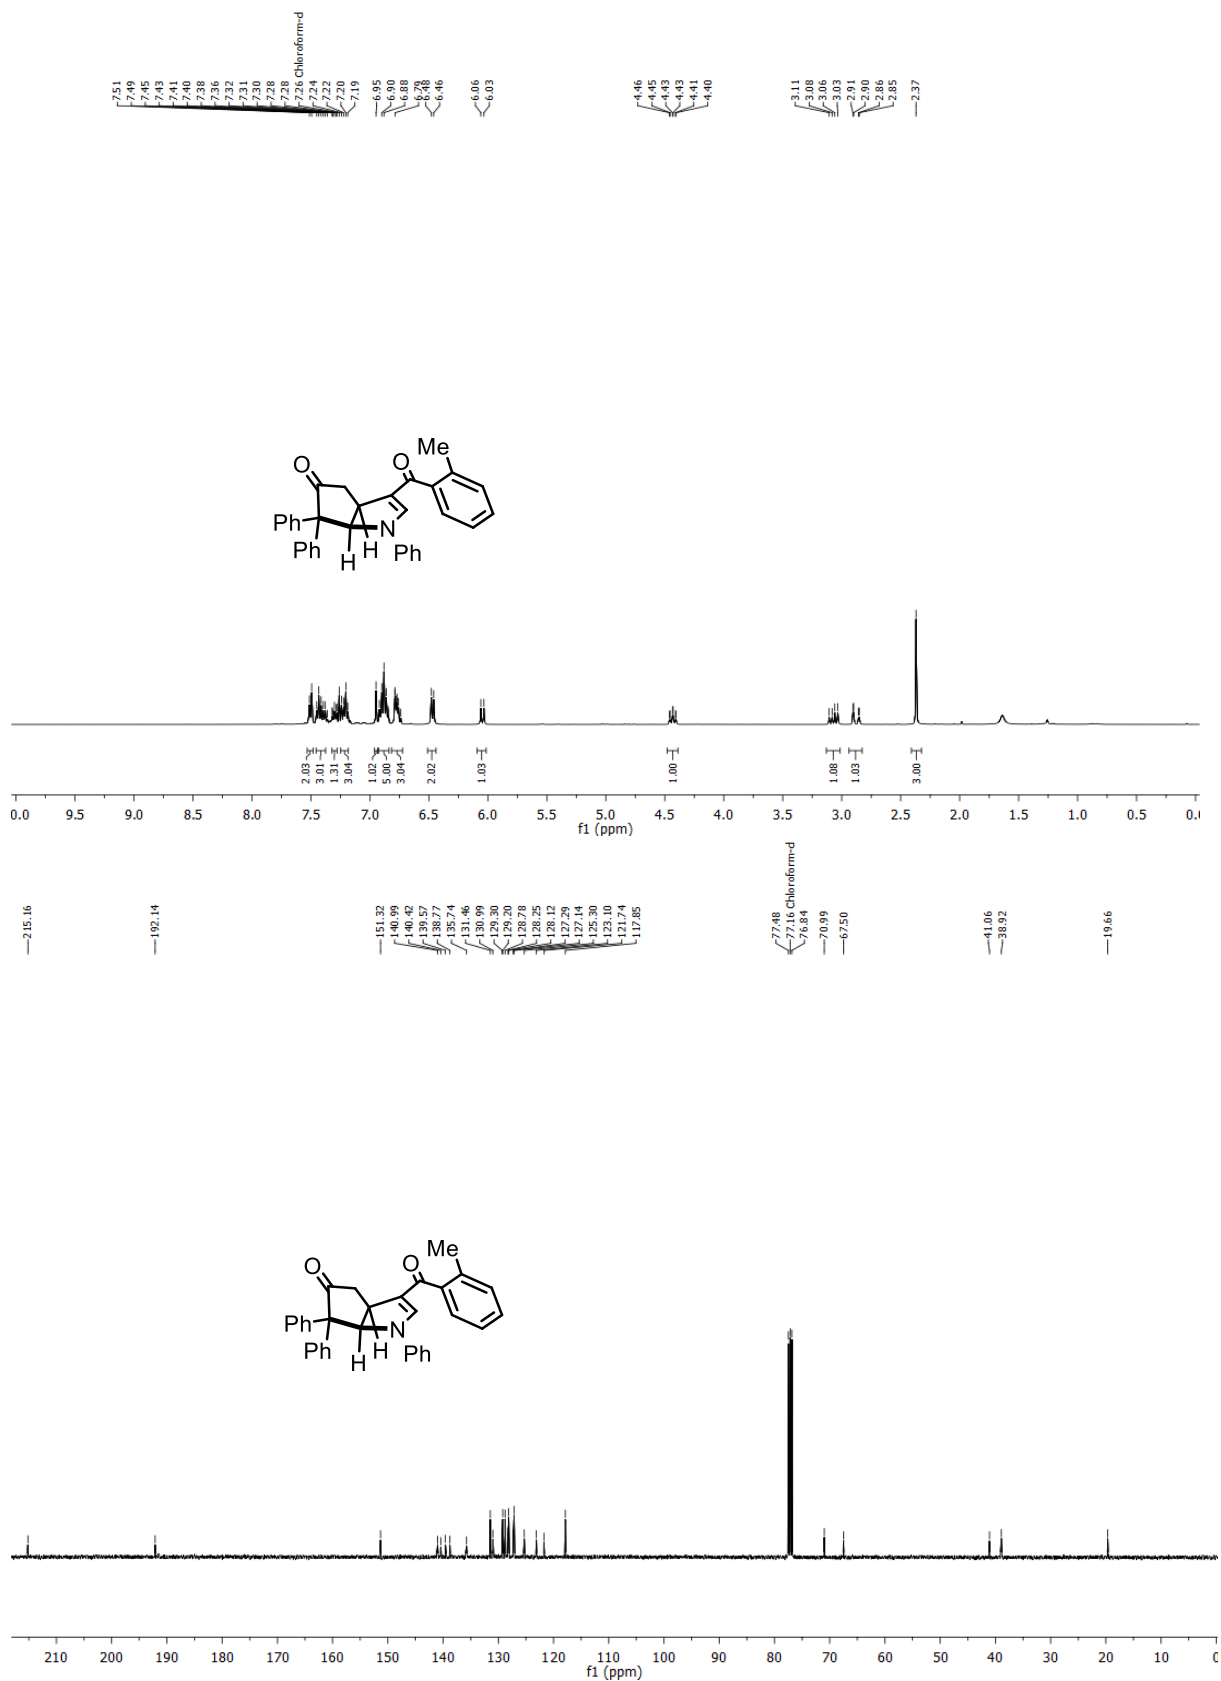

$^1\text{H}$  NMR spectra at 400MHz and  $^{13}\text{C}$  NMR spectra at 100MHz in  $\text{CDCl}_3$  (**18**)

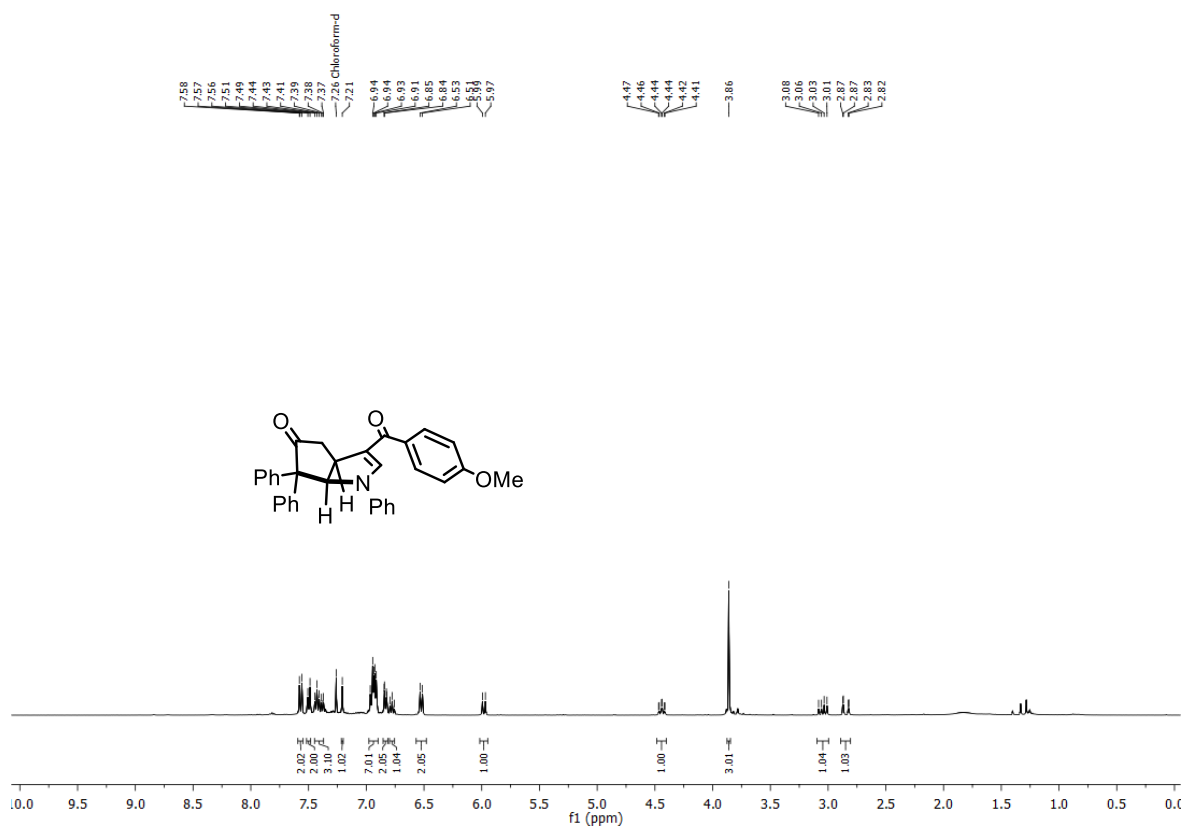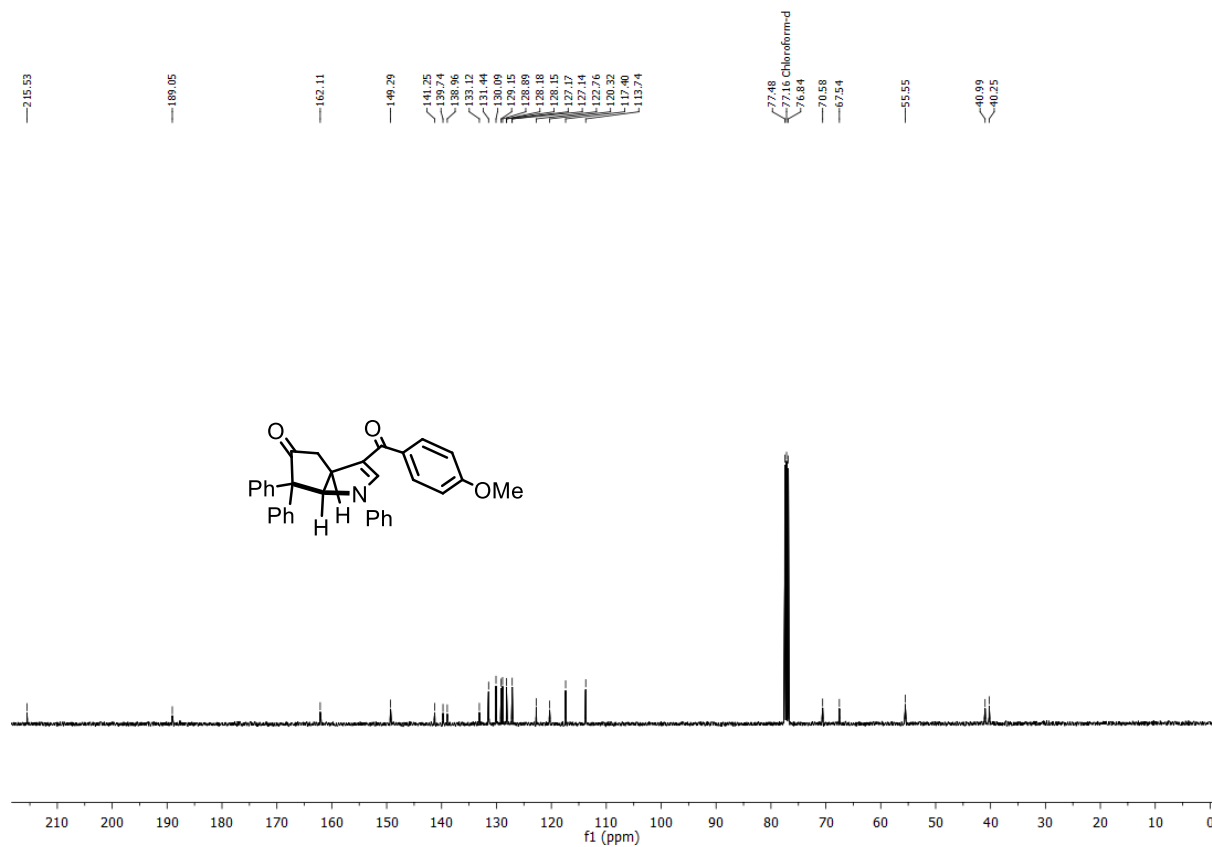

<sup>1</sup>H NMR spectra at 400MHz and <sup>13</sup>C NMR spectra at 100MHz in CDCl<sub>3</sub>(19)

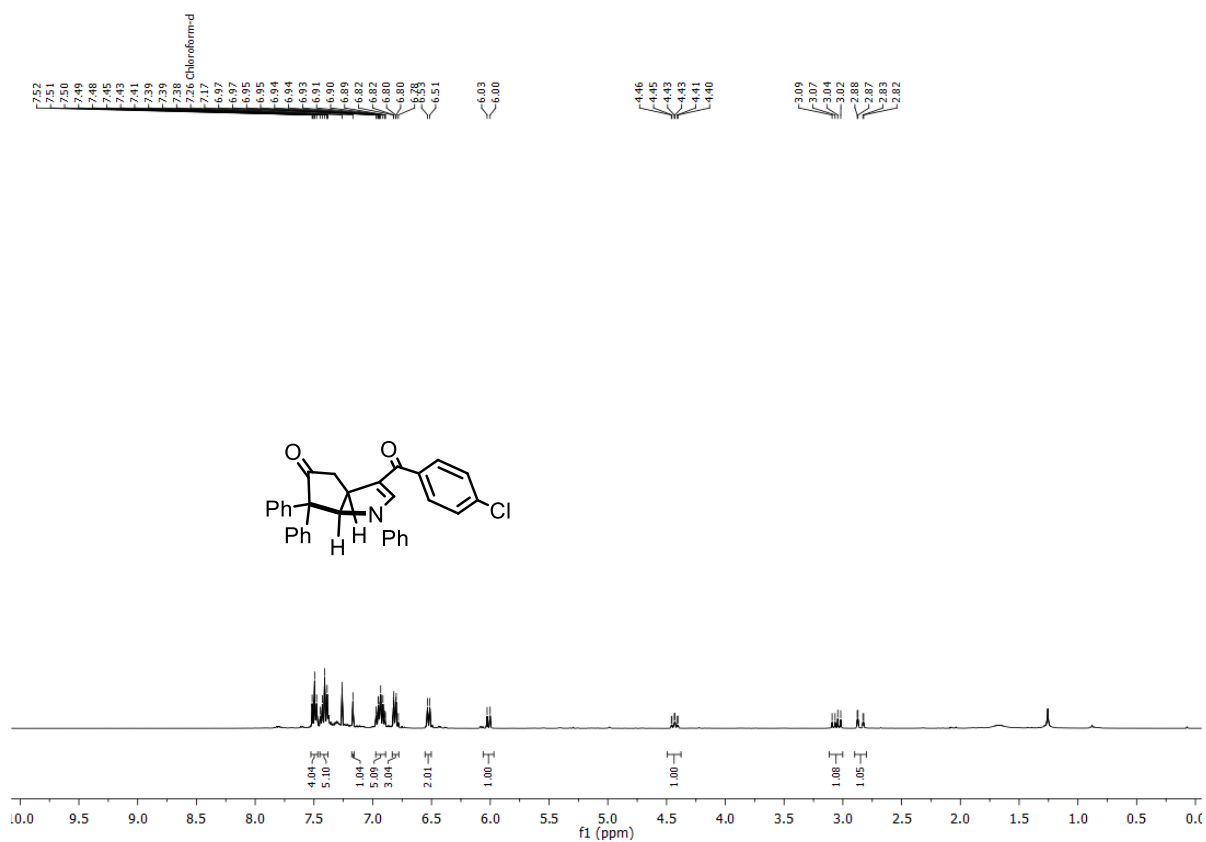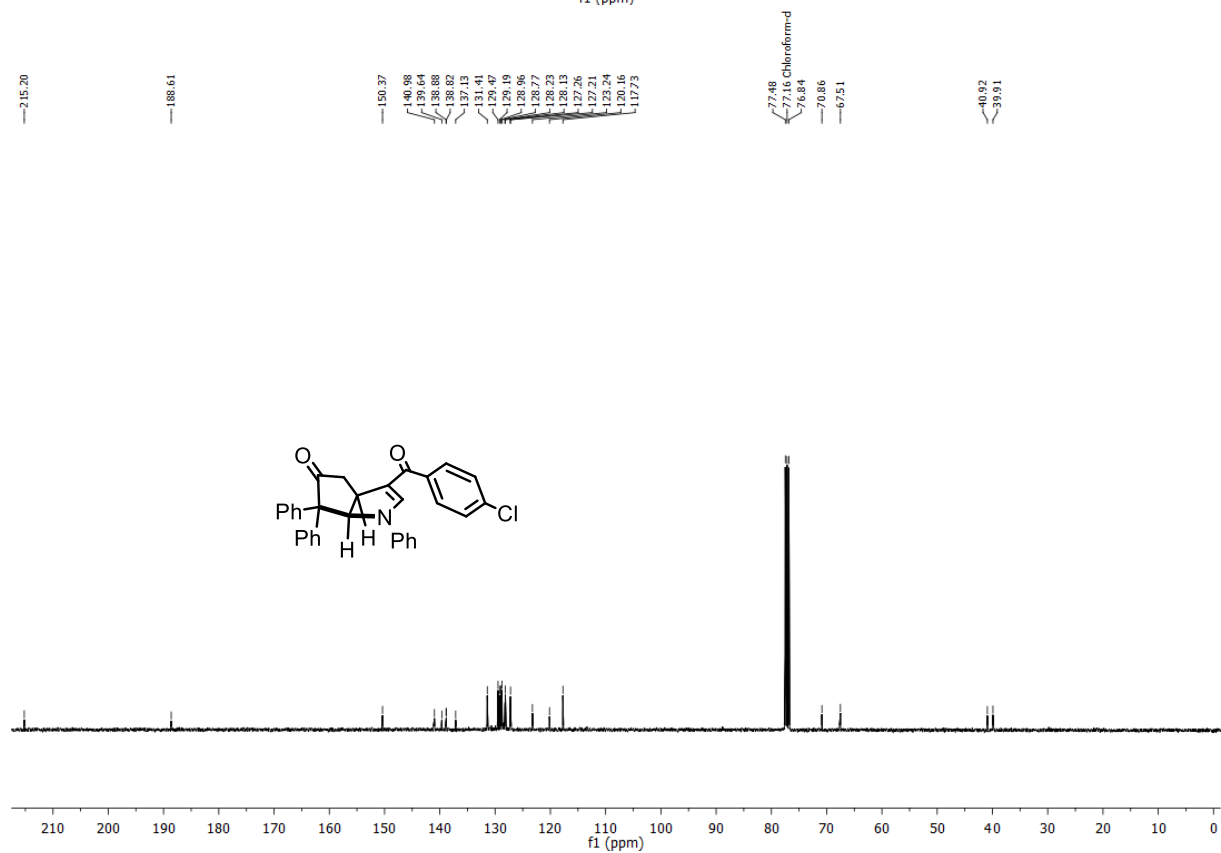

$^1\text{H}$  NMR spectra at 400MHz and  $^{13}\text{C}$  NMR spectra at 100MHz in  $\text{CDCl}_3$ (**20**)

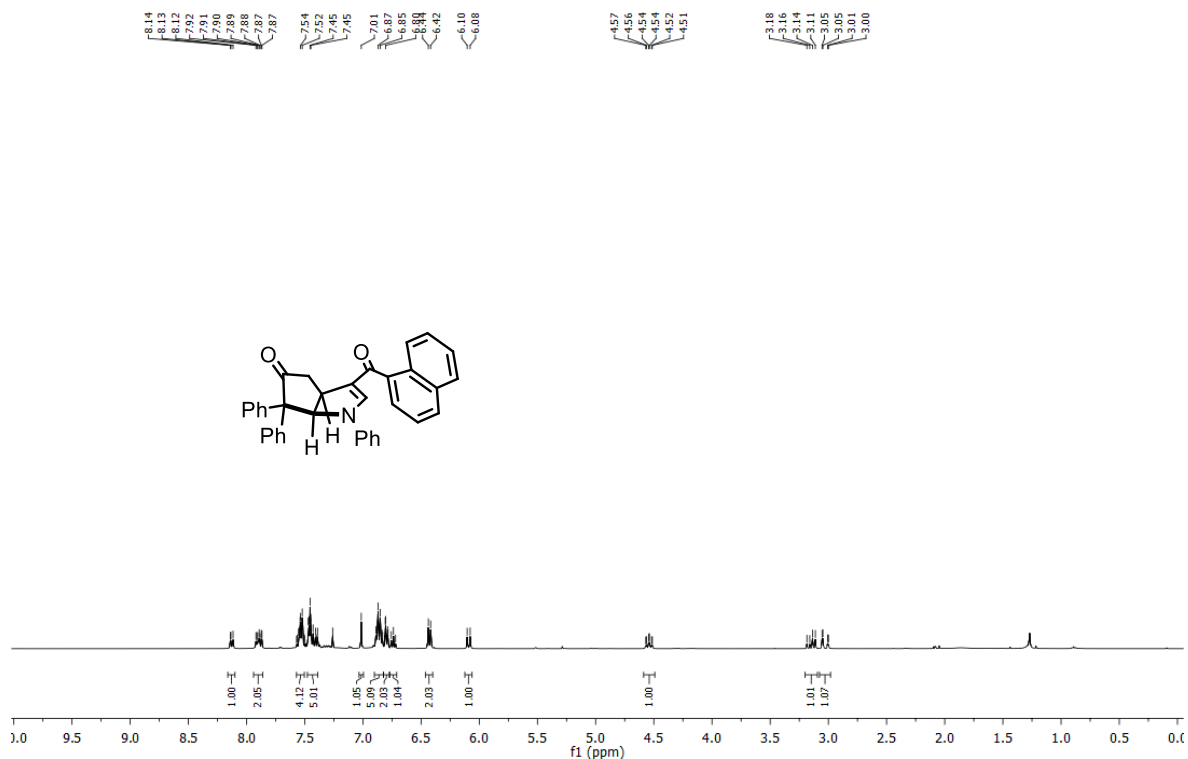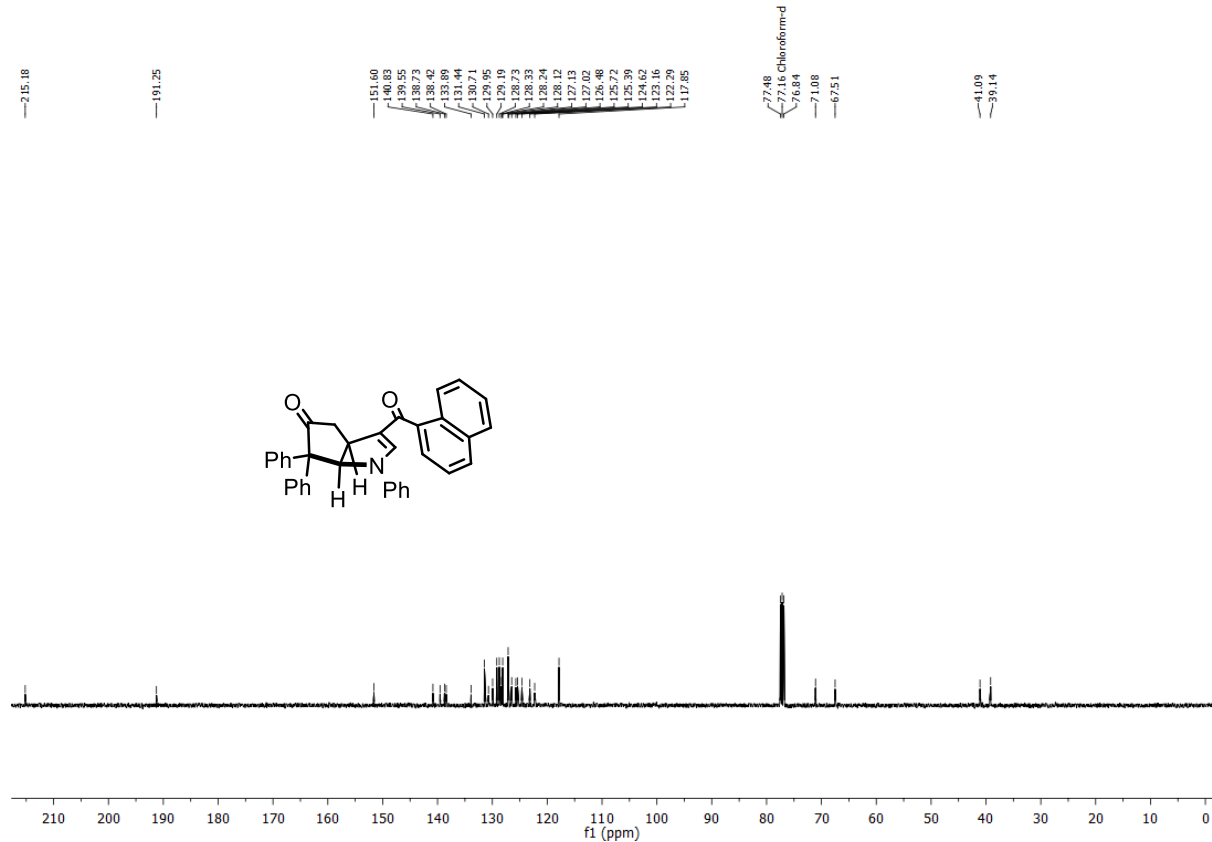

$^1\text{H}$  NMR spectra at 400MHz and  $^{13}\text{C}$  NMR spectra at 100MHz in  $\text{CDCl}_3$ (21)

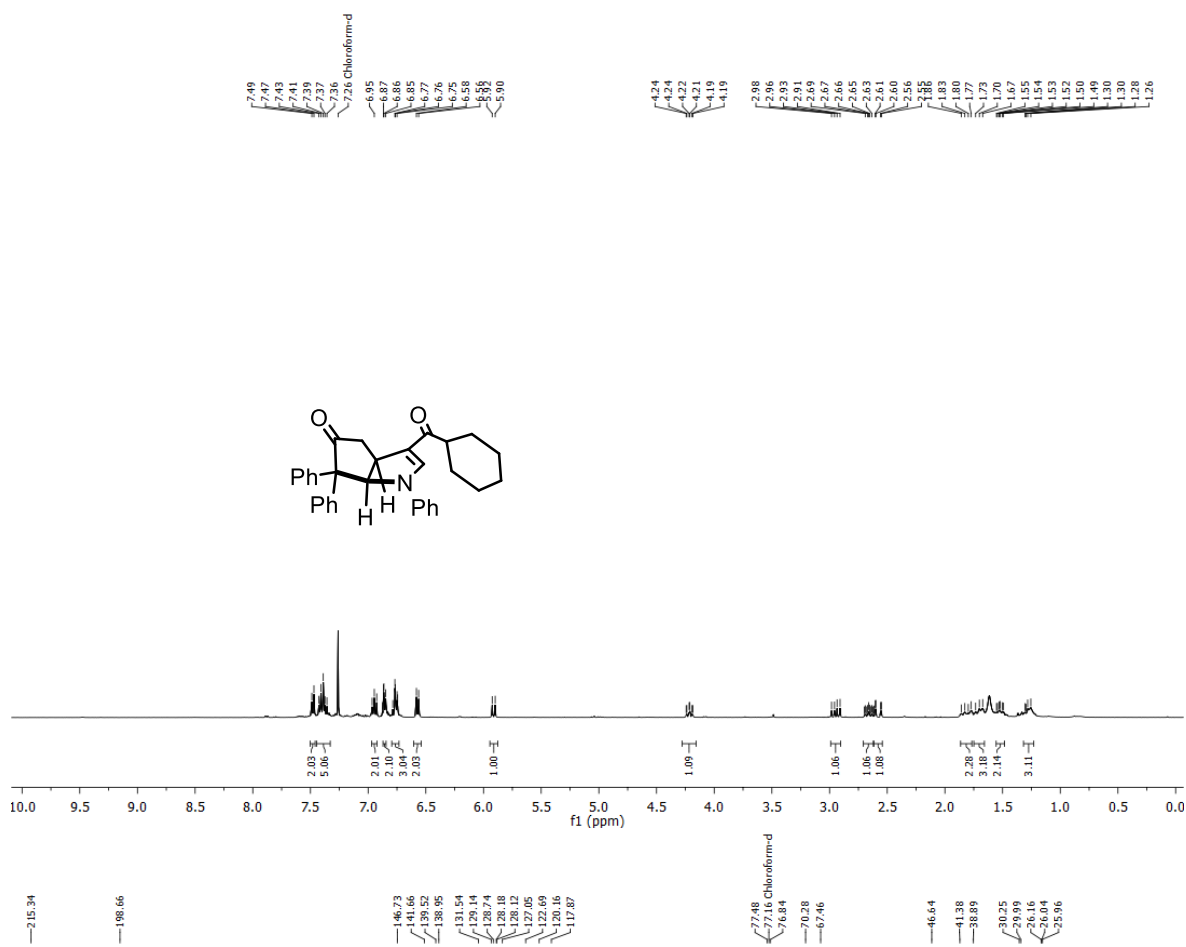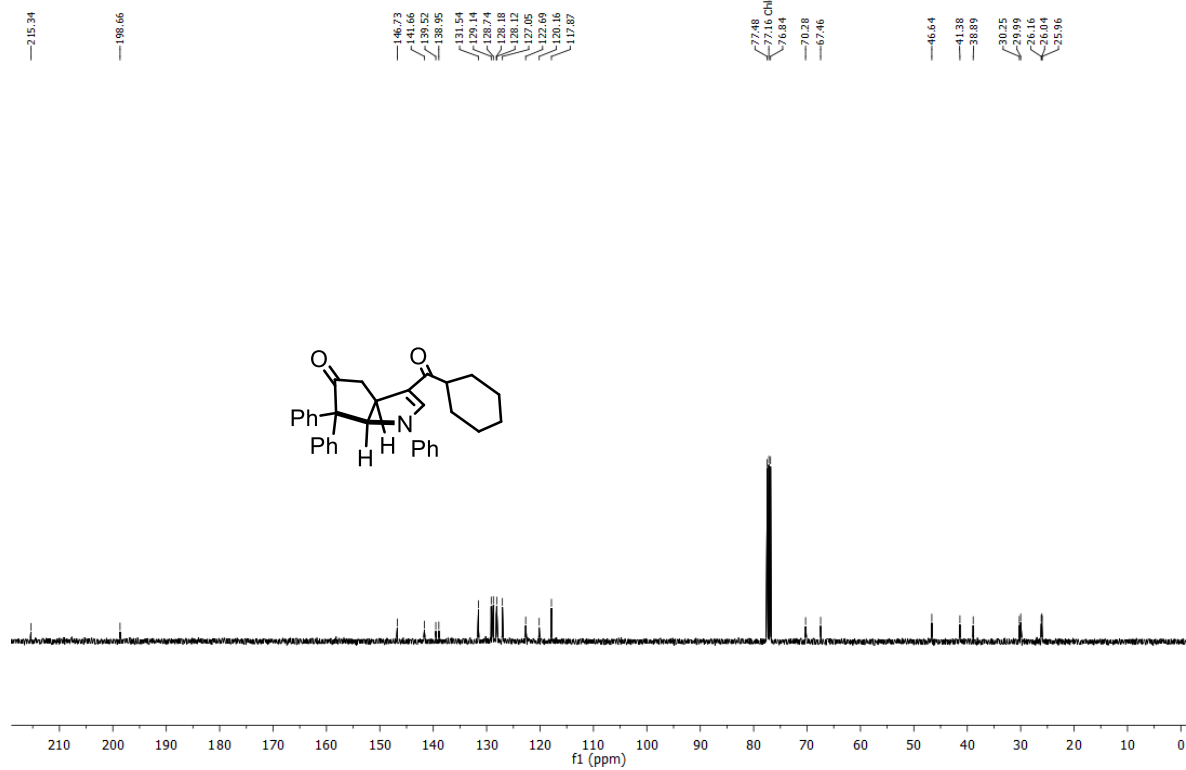

$^1\text{H}$  NMR spectra at 400MHz and  $^{13}\text{C}$  NMR spectra at 100MHz in  $\text{CDCl}_3$  (**22**)

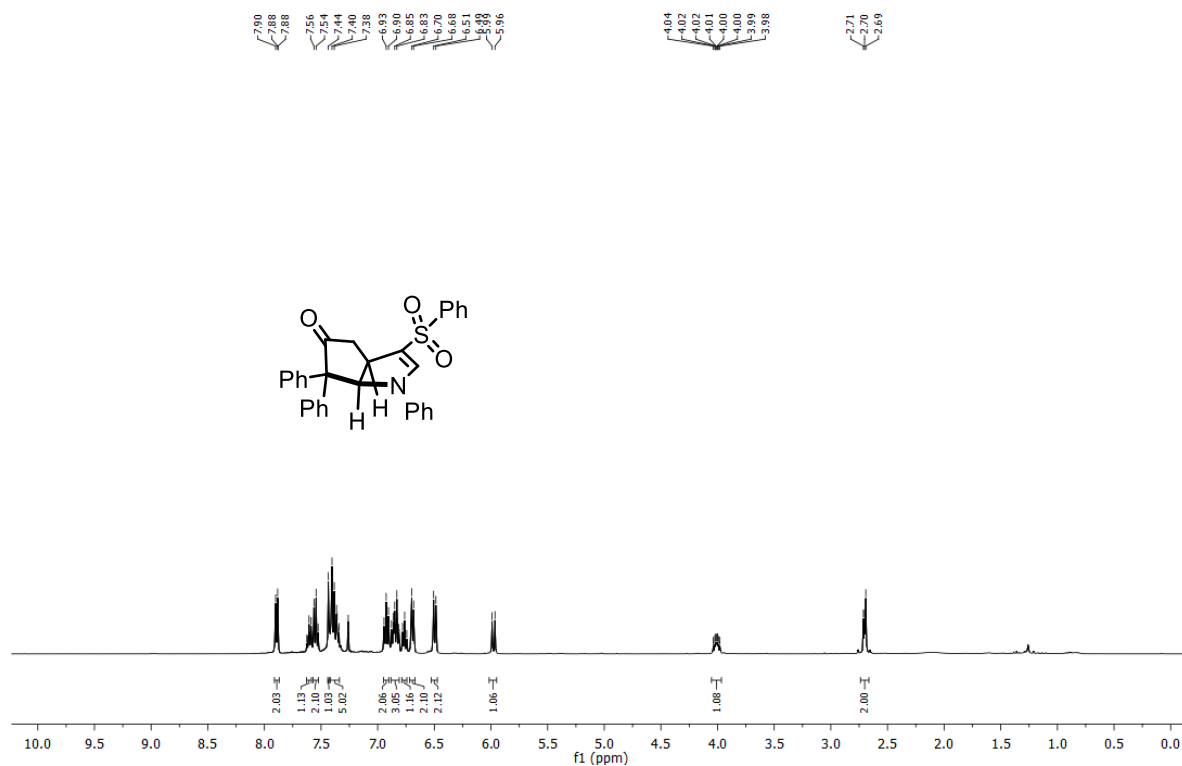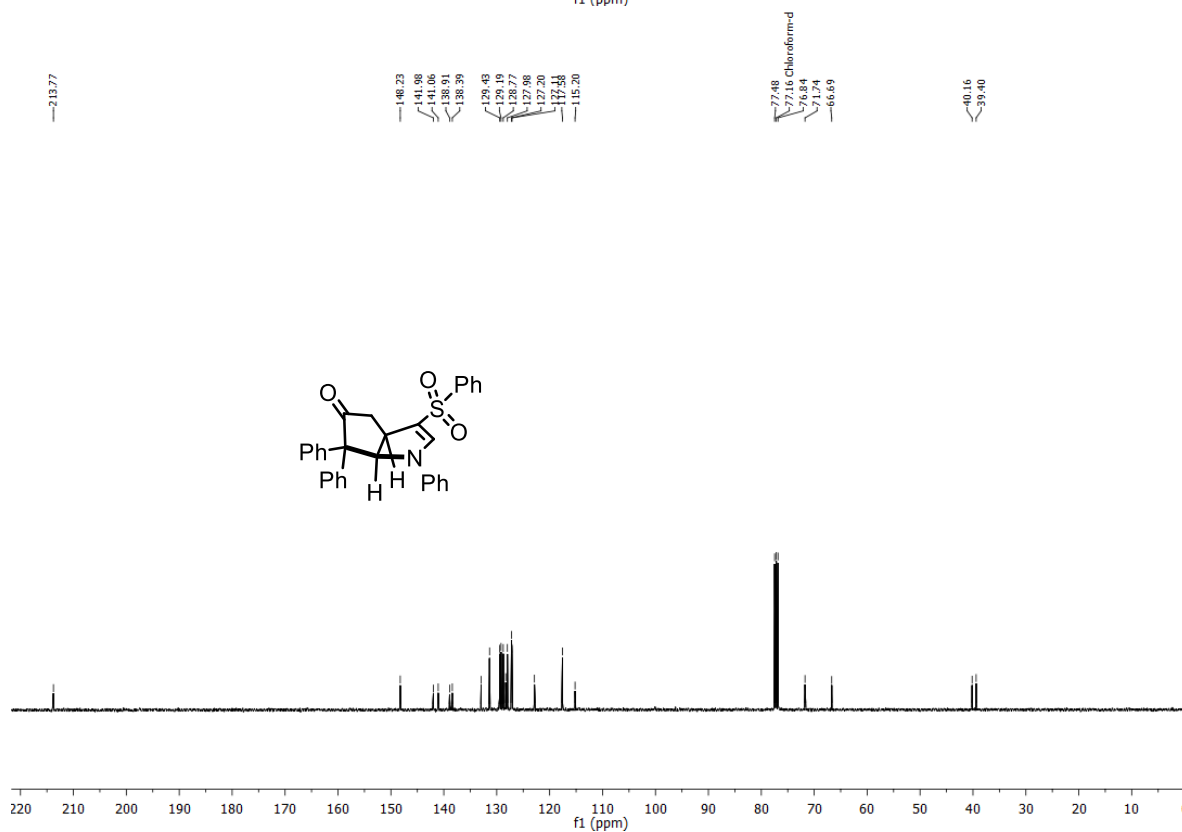

$^1\text{H}$  NMR spectra at 400MHz and  $^{13}\text{C}$  NMR spectra at 100MHz in  $\text{CDCl}_3$  (23)

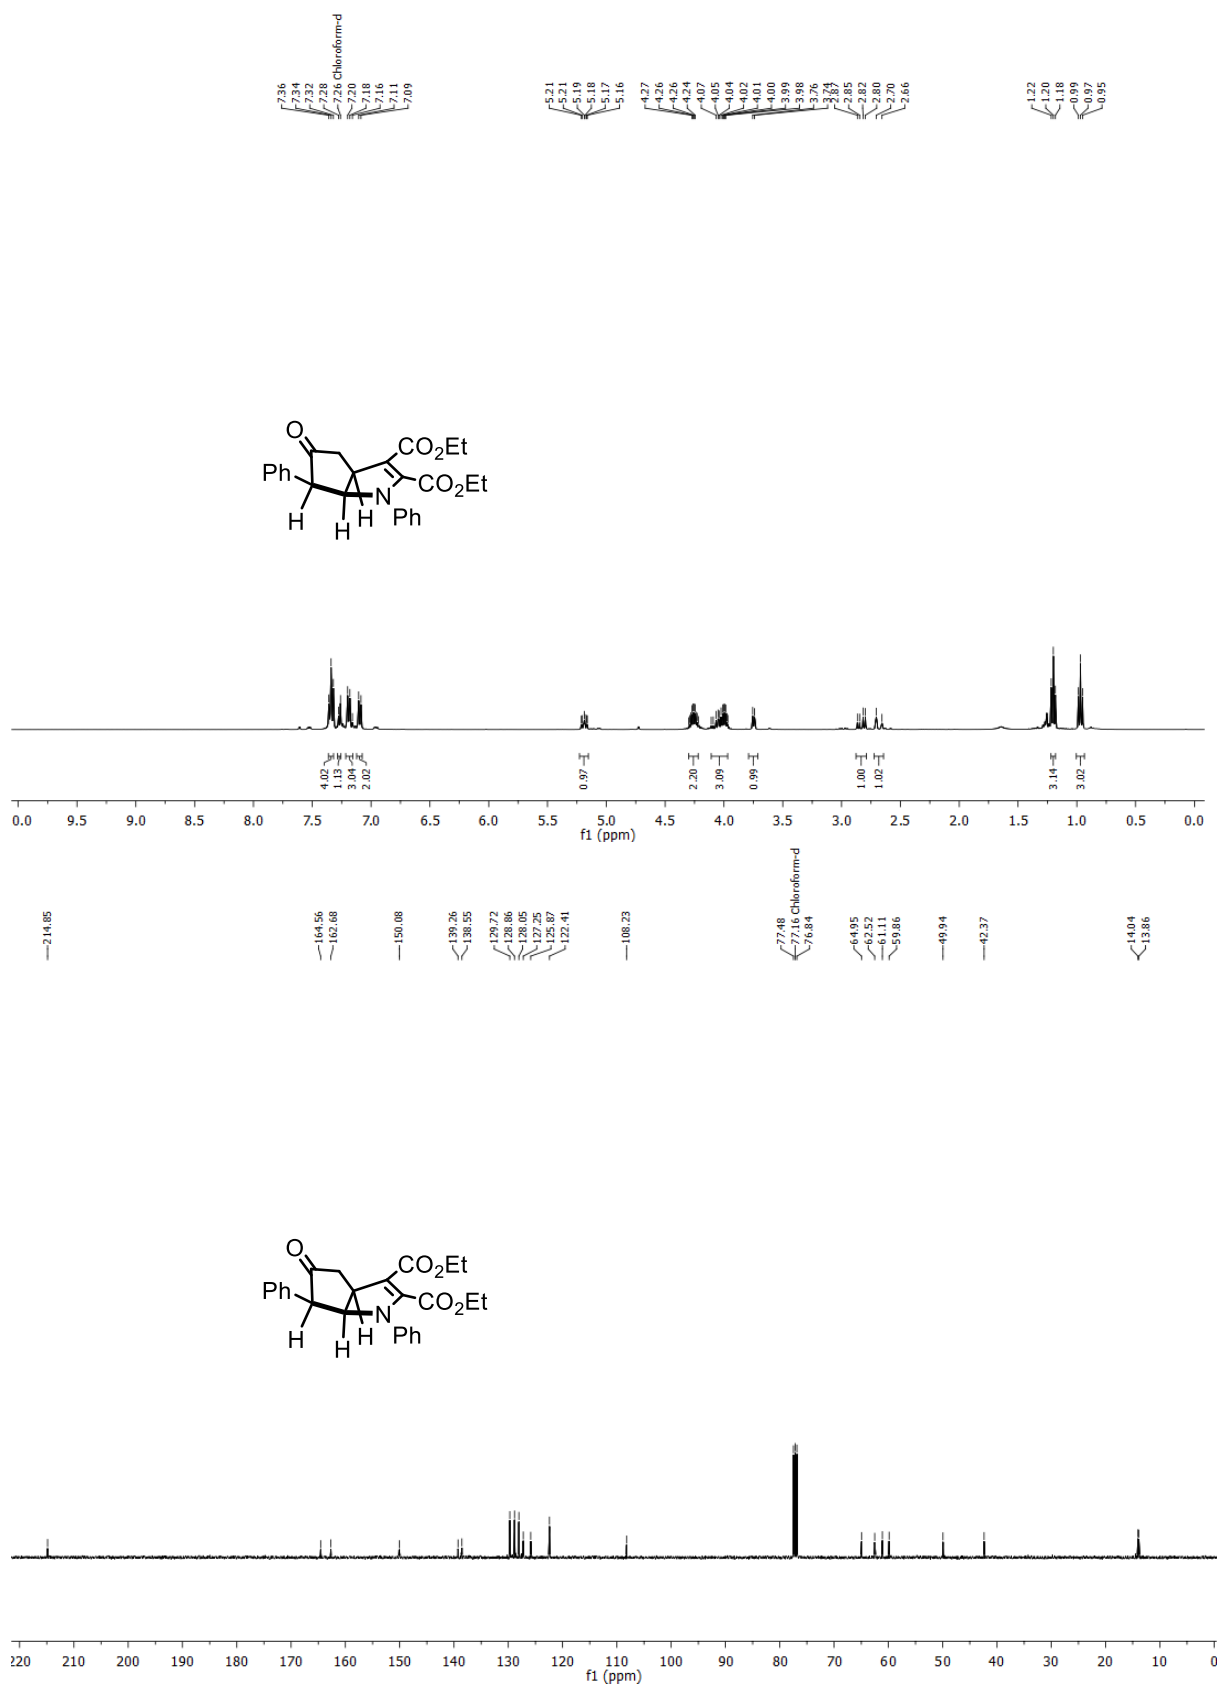

<sup>1</sup>H NMR spectra at 400MHz and <sup>13</sup>C NMR spectra at 100MHz in CDCl<sub>3</sub>(24)

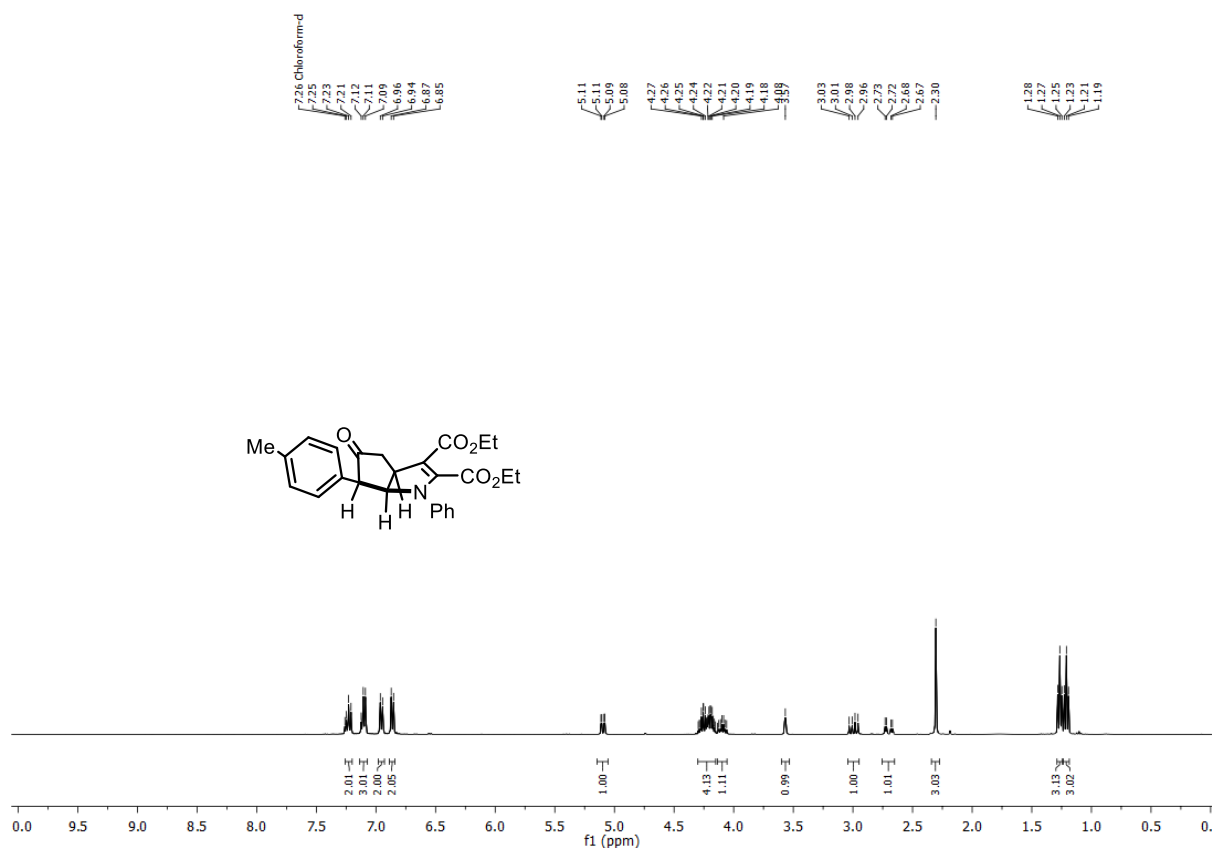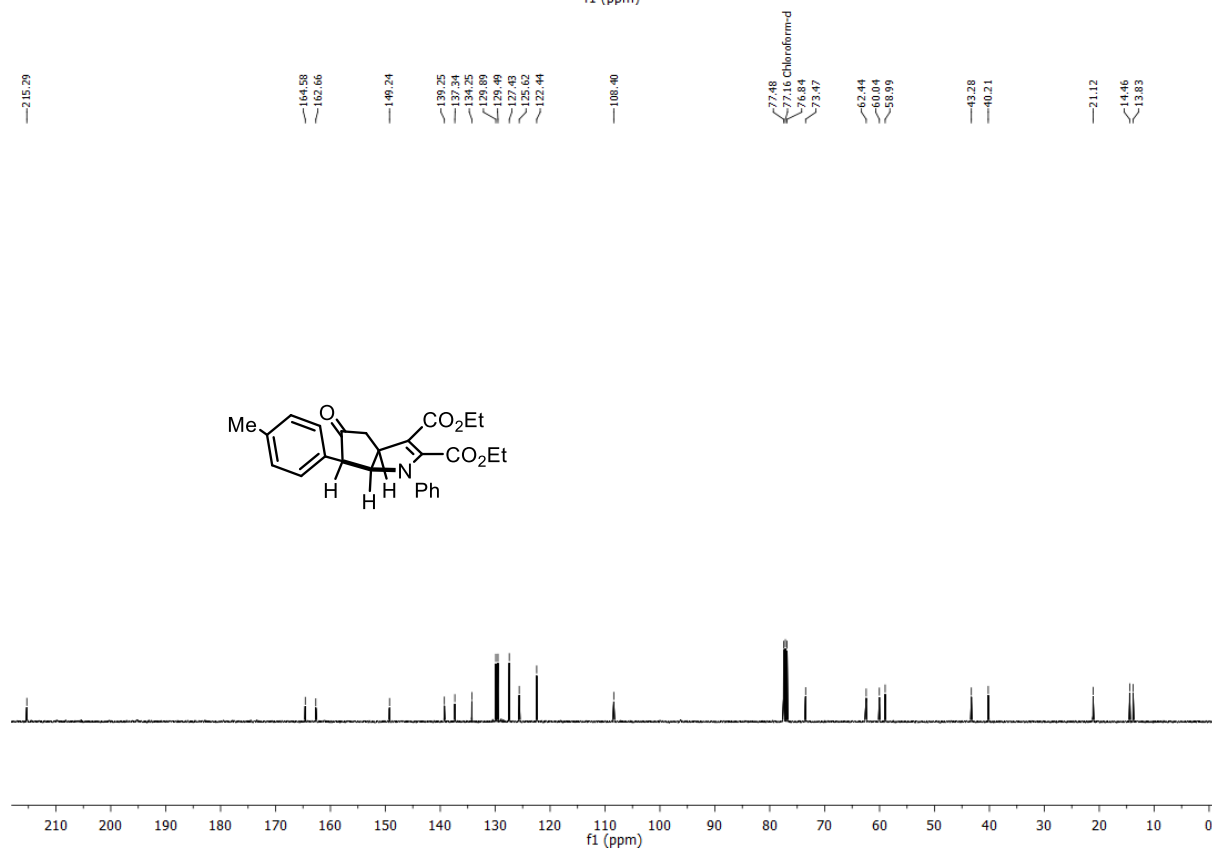



$^1\text{H}$  NMR spectra at 400MHz and  $^{13}\text{C}$  NMR spectra at 100MHz in  $\text{CDCl}_3$ (25)

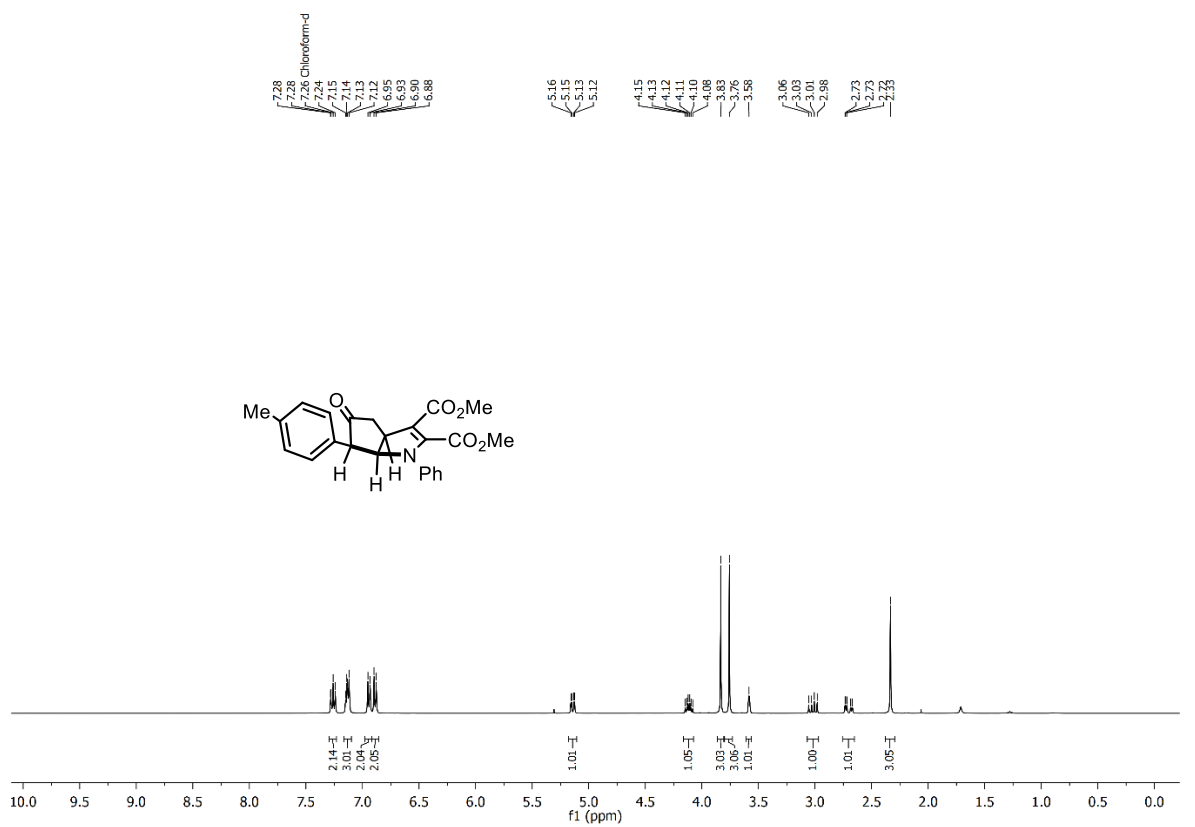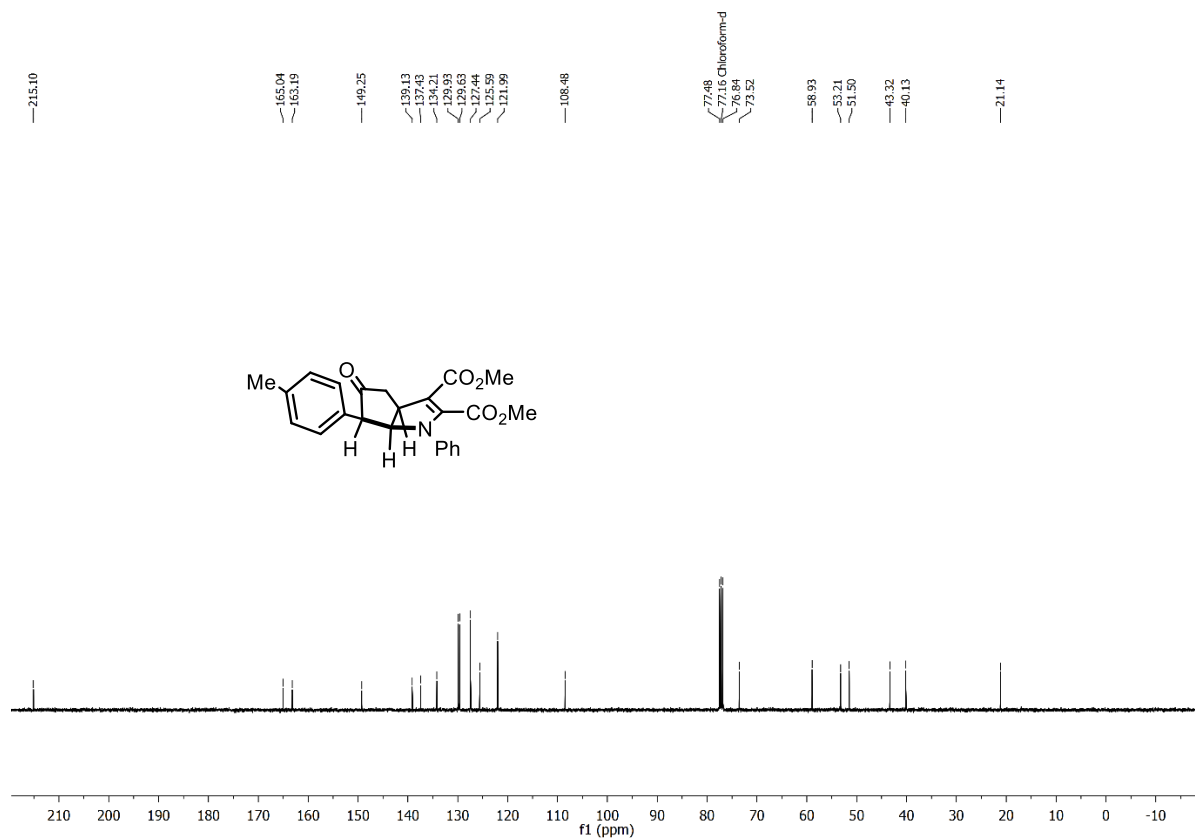

$^1\text{H}$  NMR spectra at 400MHz and  $^{13}\text{C}$  NMR spectra at 100MHz in  $\text{CDCl}_3$  (**26**)

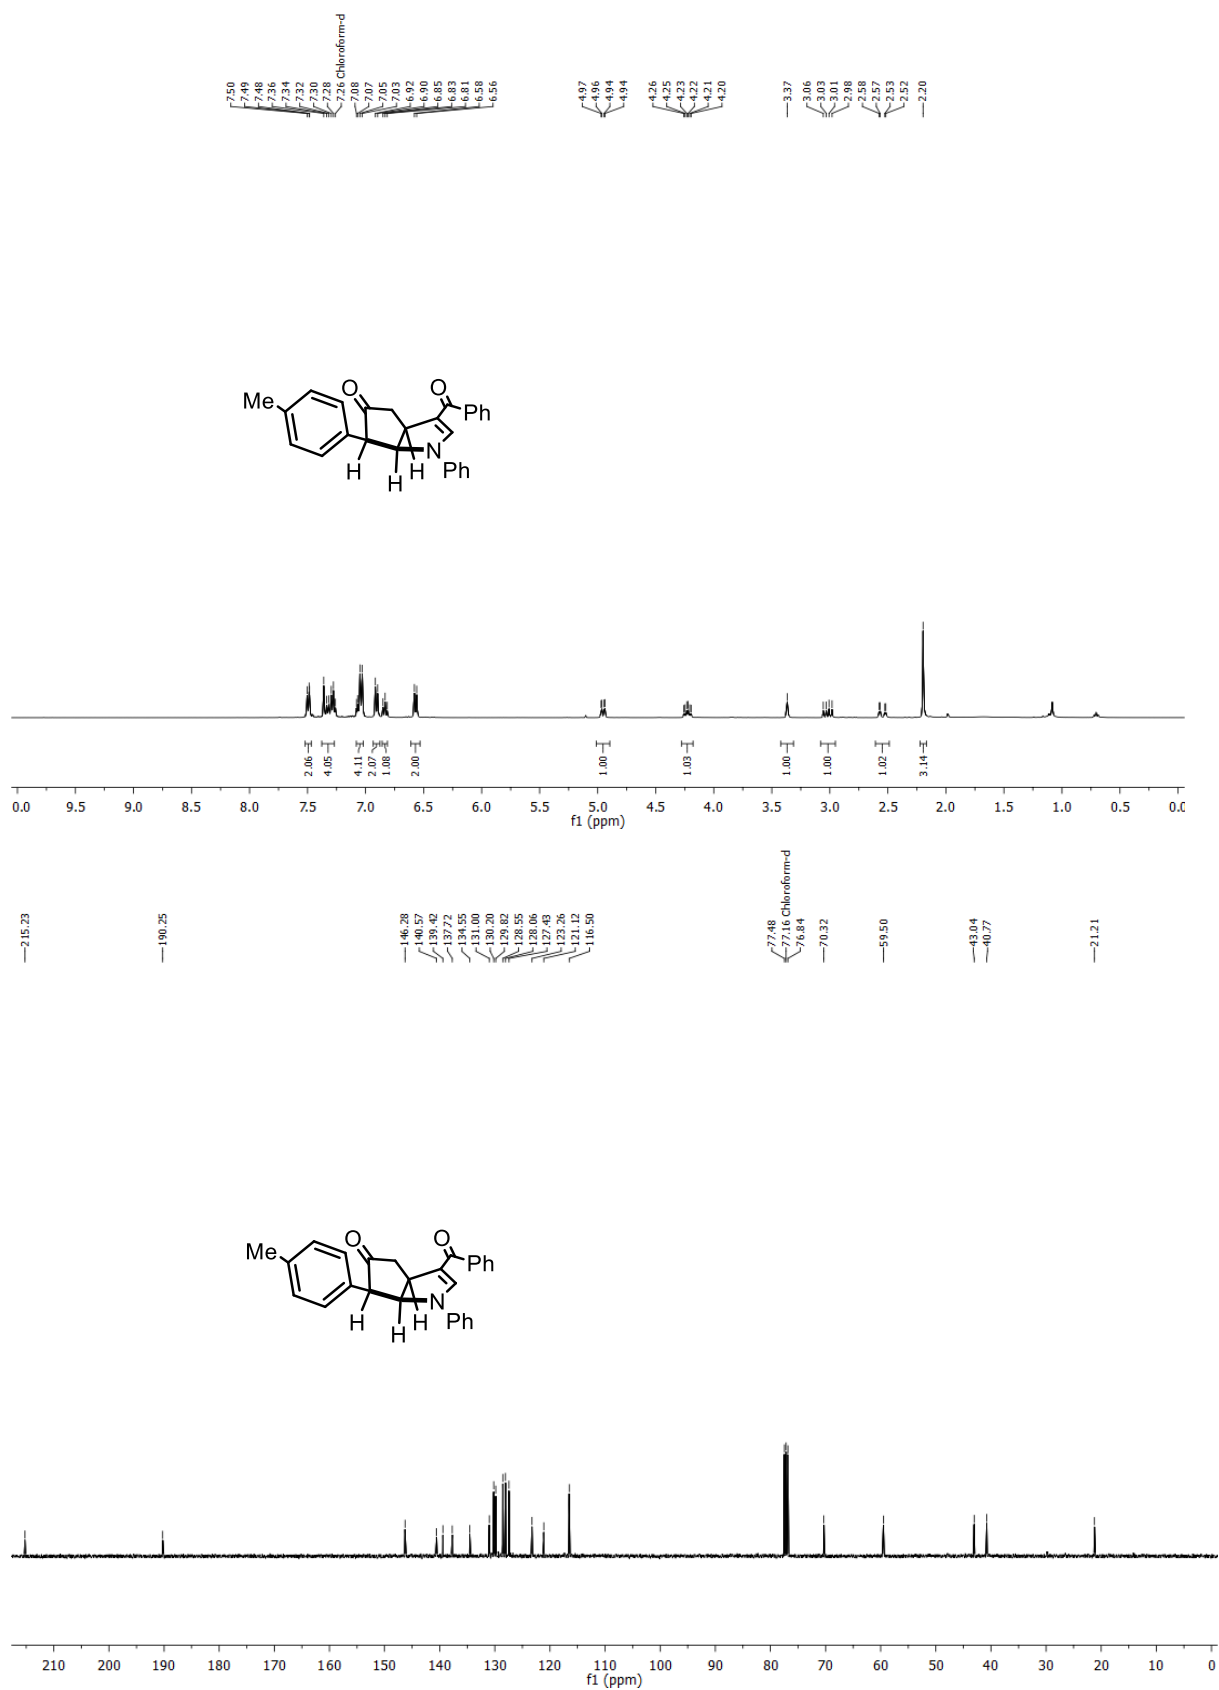

<sup>1</sup>H NMR spectra at 400MHz and <sup>13</sup>C NMR spectra at 100MHz in CDCl<sub>3</sub>(**27**)

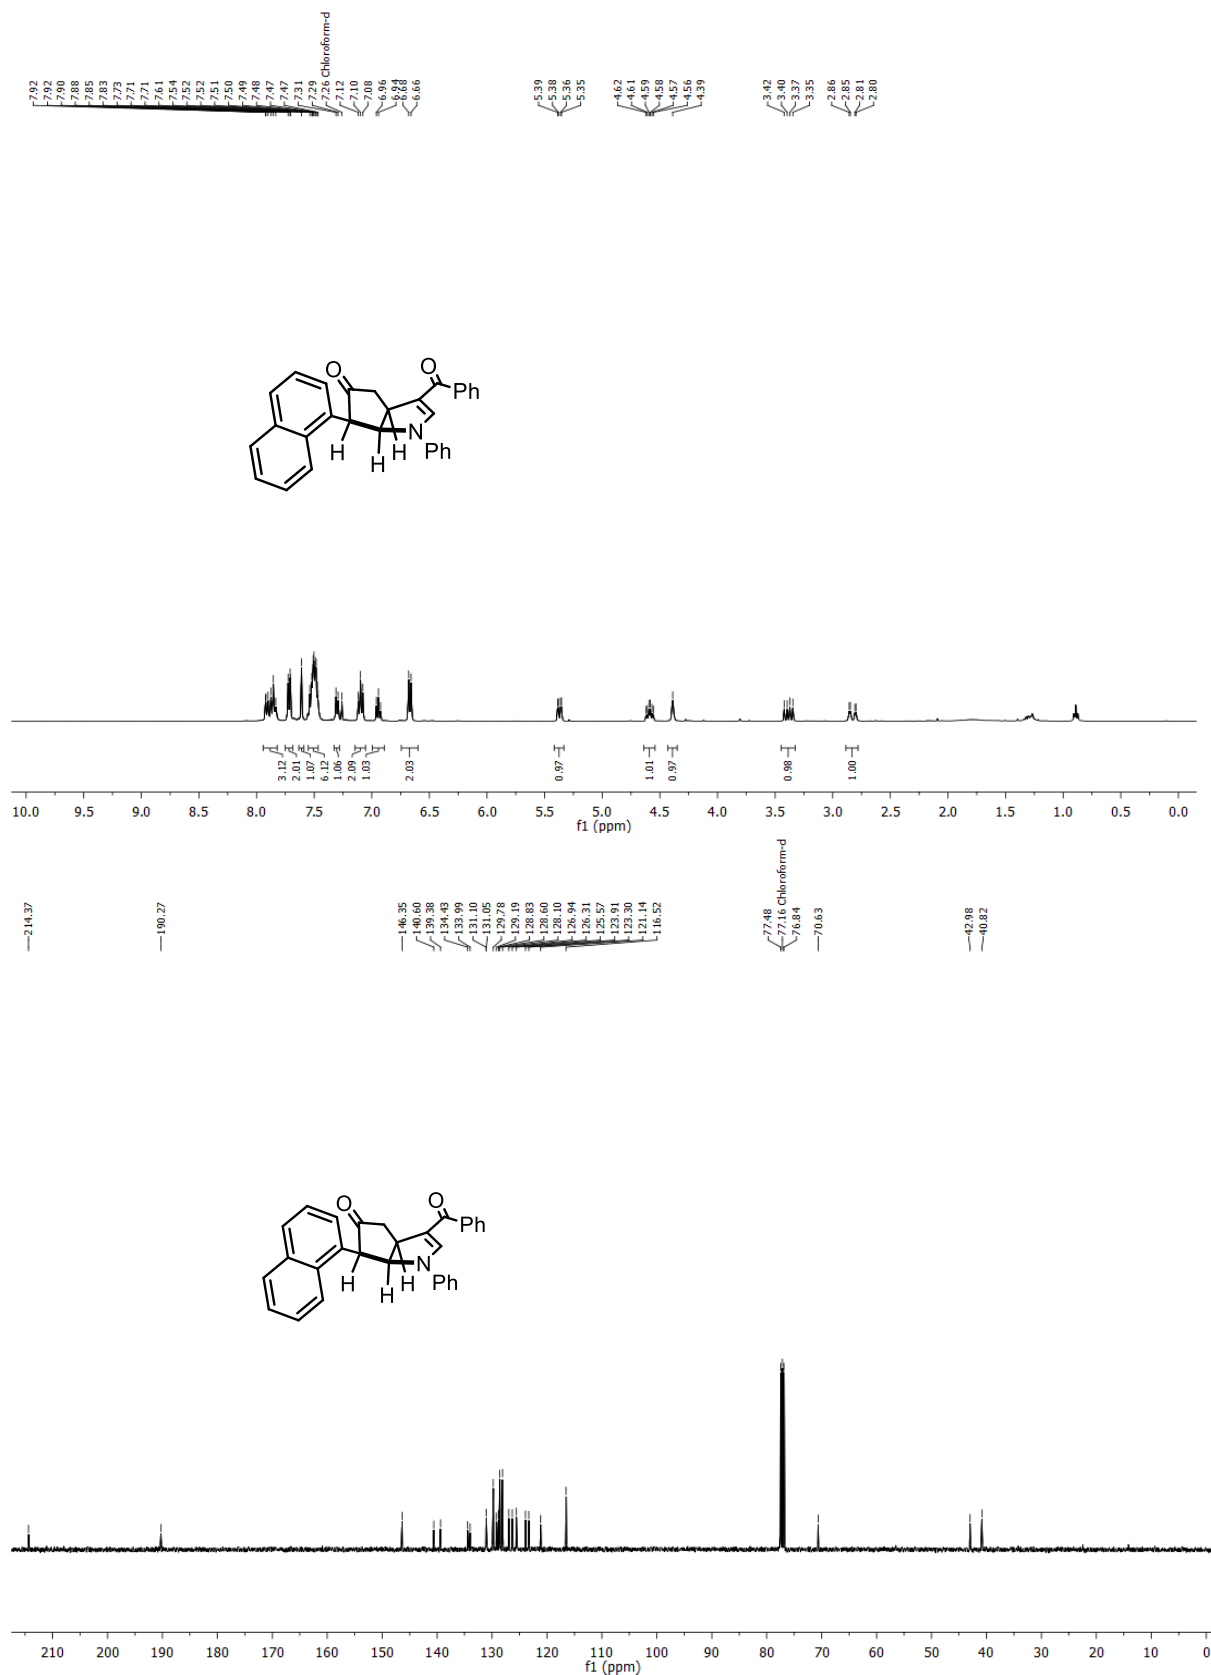

$^1\text{H}$  NMR spectra at 400MHz and  $^{13}\text{C}$  NMR spectra at 100MHz in  $\text{CDCl}_3$  (**28**)

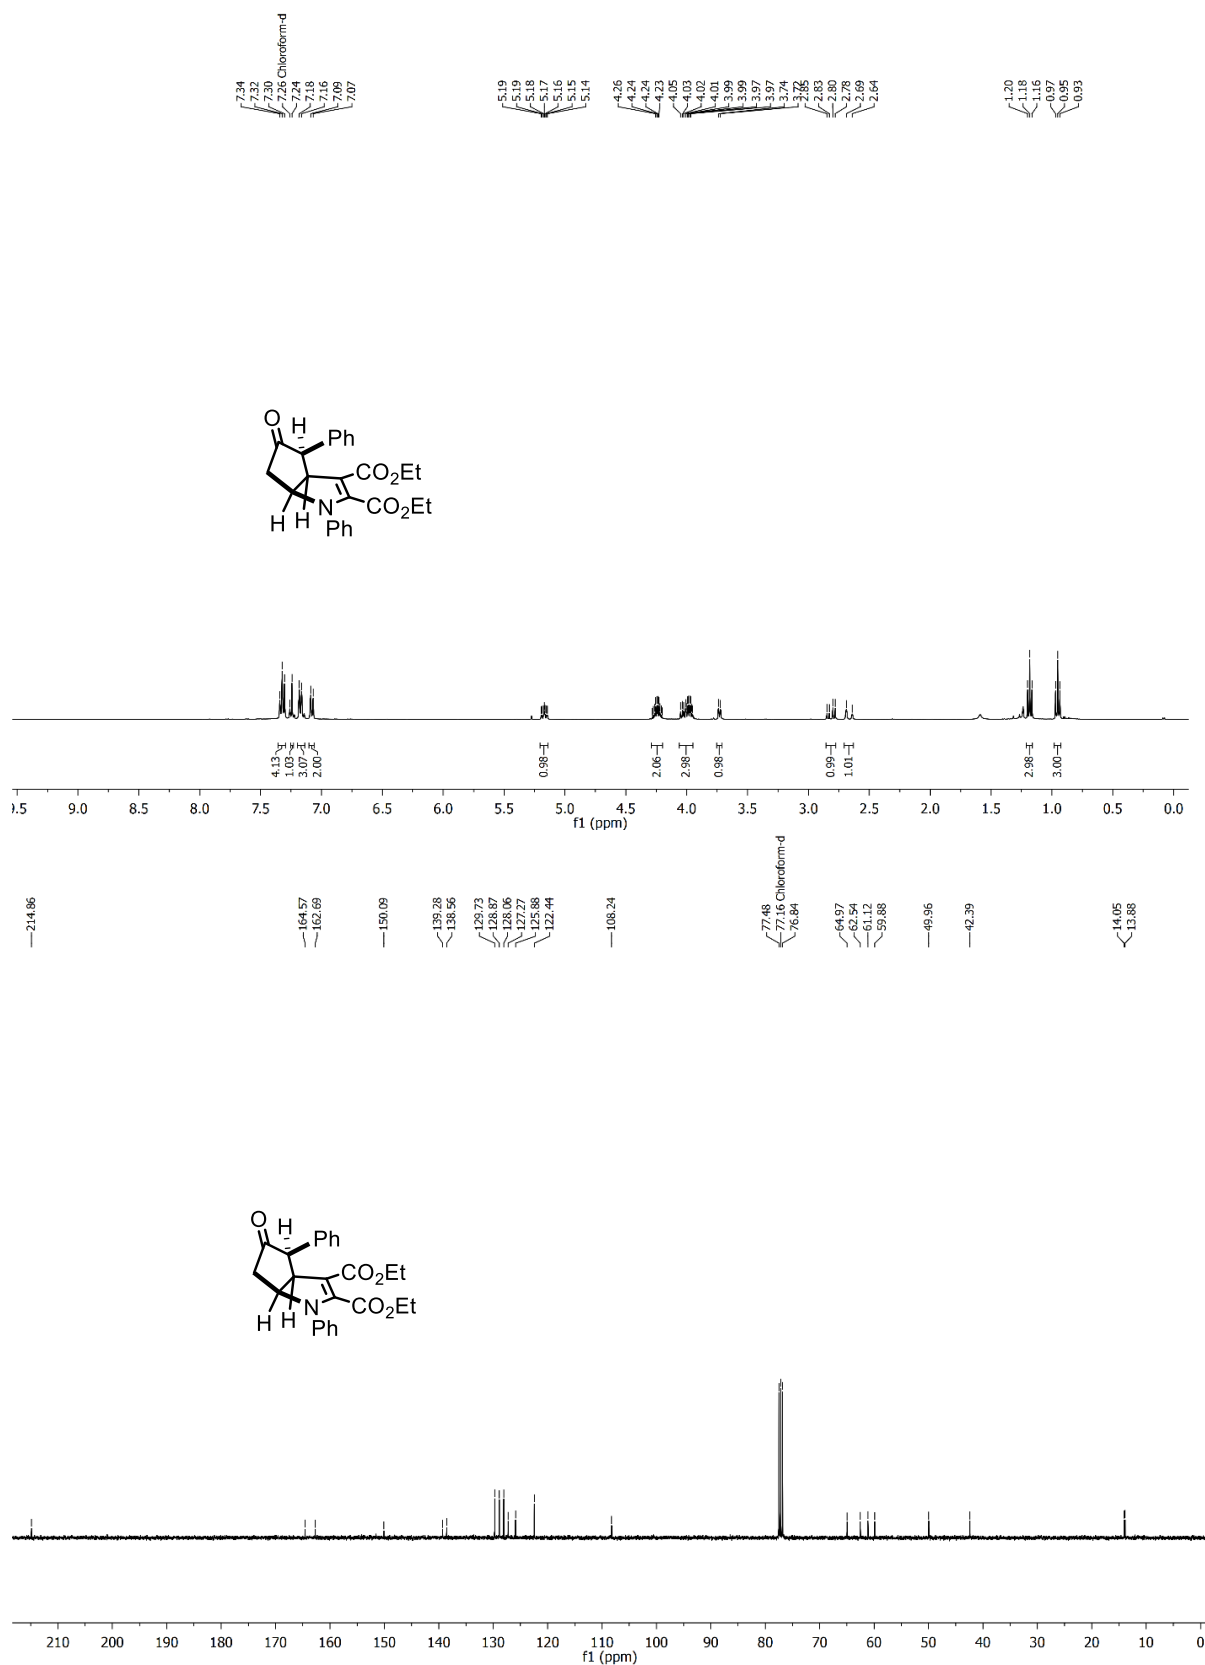

$^1\text{H}$  NMR spectra at 400MHz and  $^{13}\text{C}$  NMR spectra at 100MHz in  $\text{CDCl}_3$  (29)

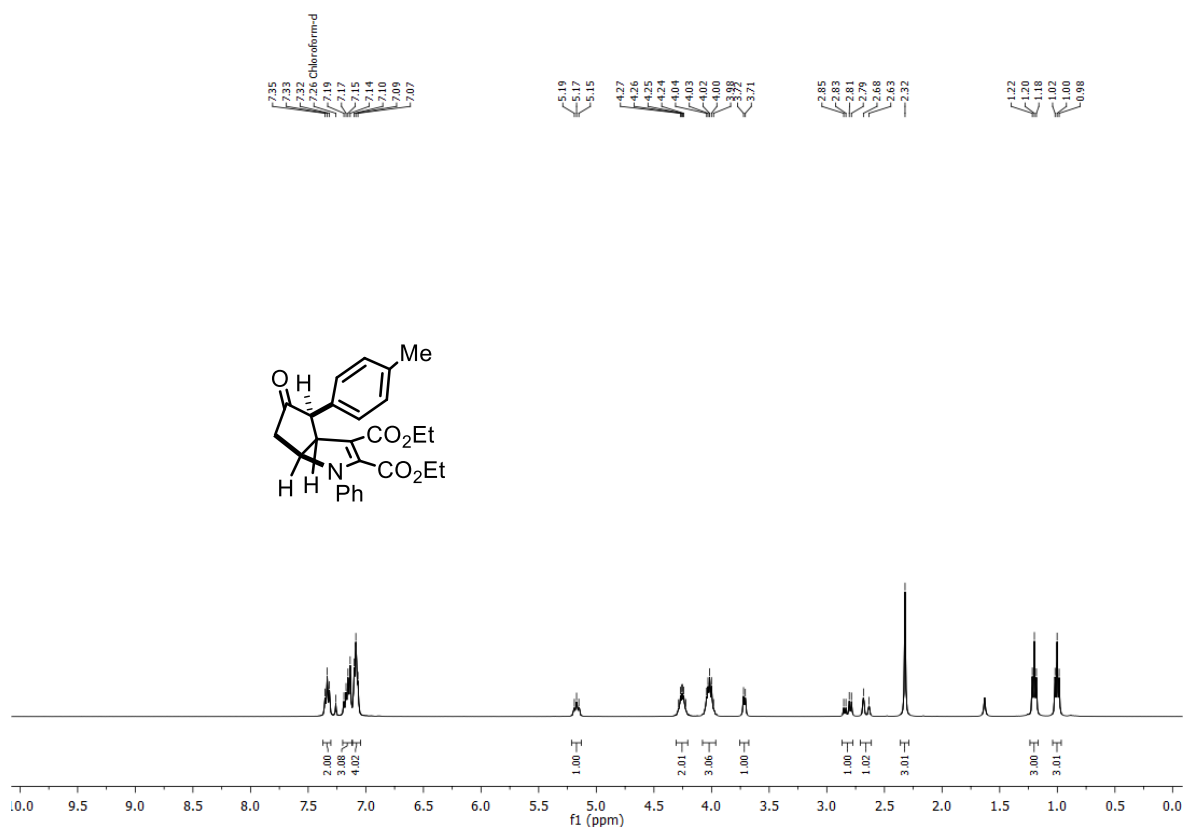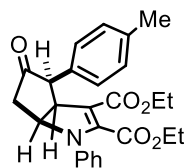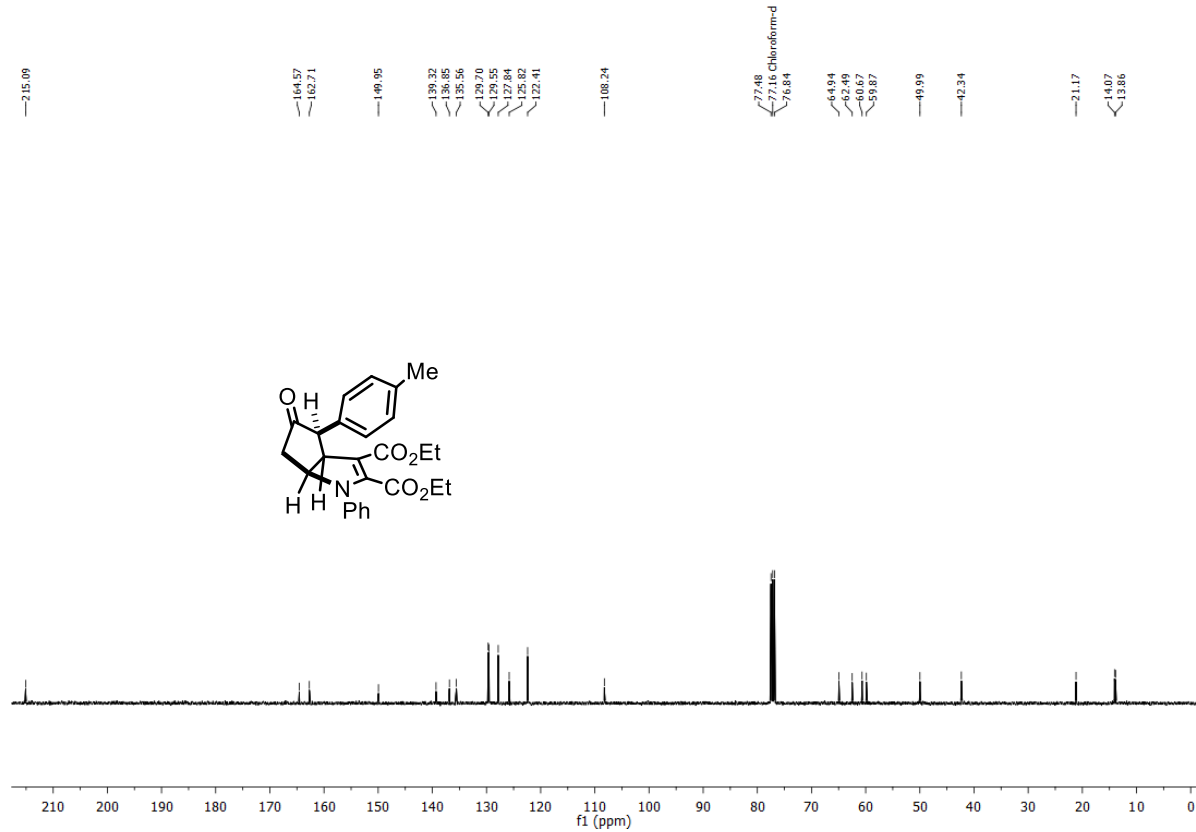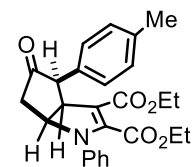

$^1\text{H}$  NMR spectra at 400MHz and  $^{13}\text{C}$  NMR spectra at 100MHz in  $\text{CDCl}_3$  (30)

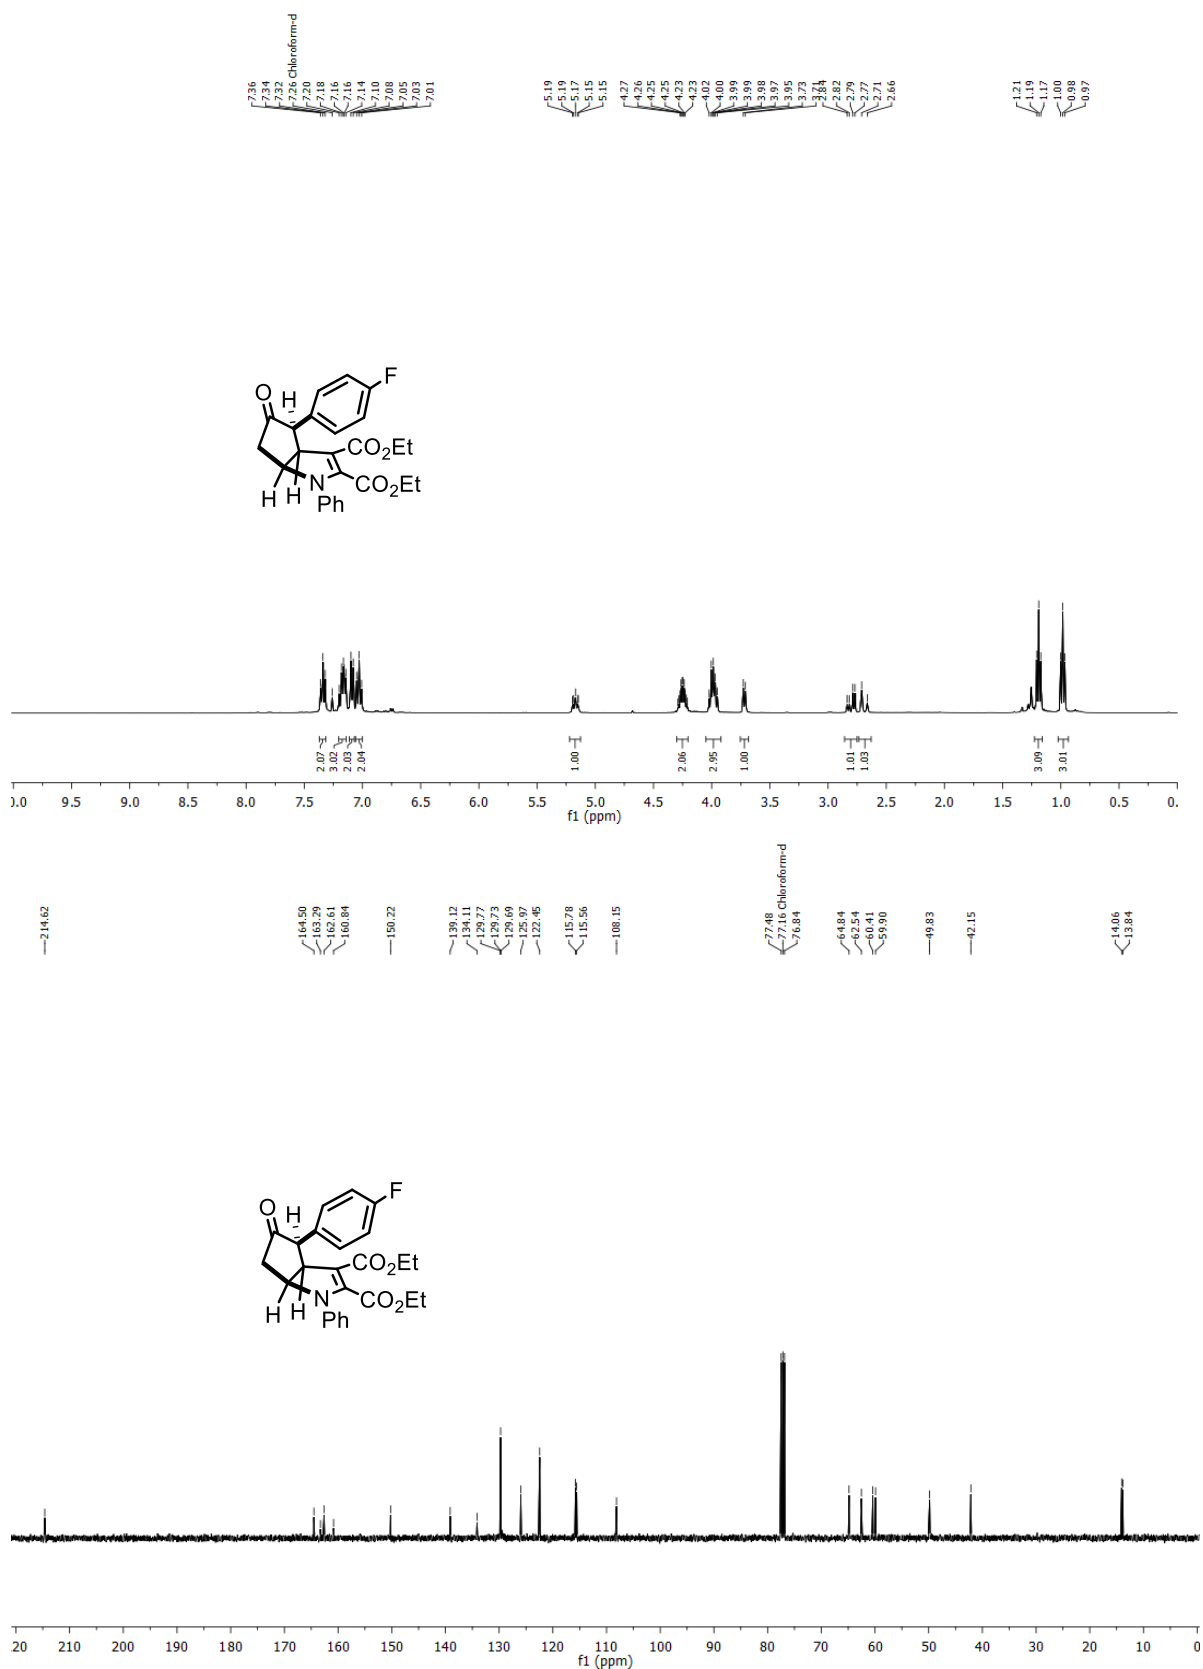

<sup>19</sup>F-NMR spectra at 400MHz (30)

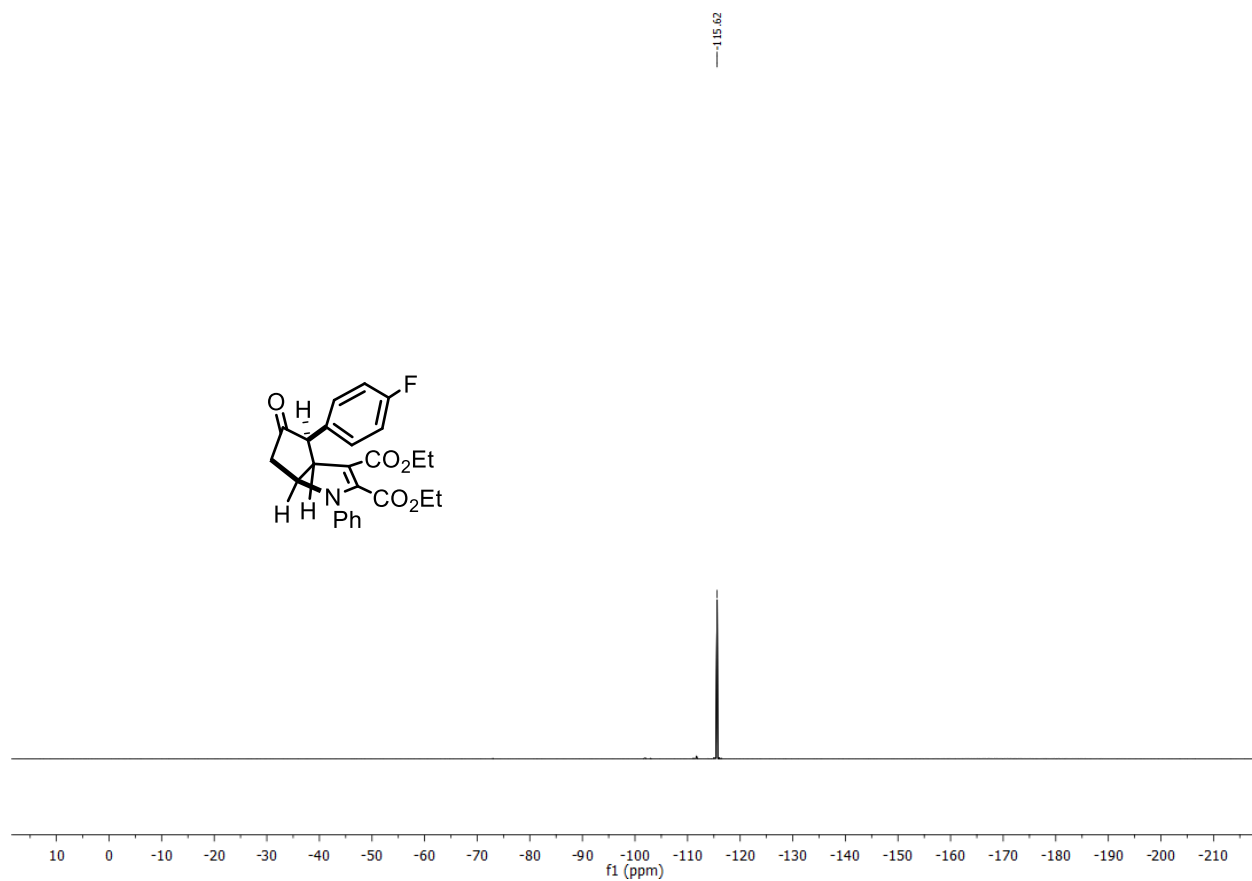

$^1\text{H}$  NMR spectra at 400MHz and  $^{13}\text{C}$  NMR spectra at 100MHz in  $\text{CDCl}_3$ (31)

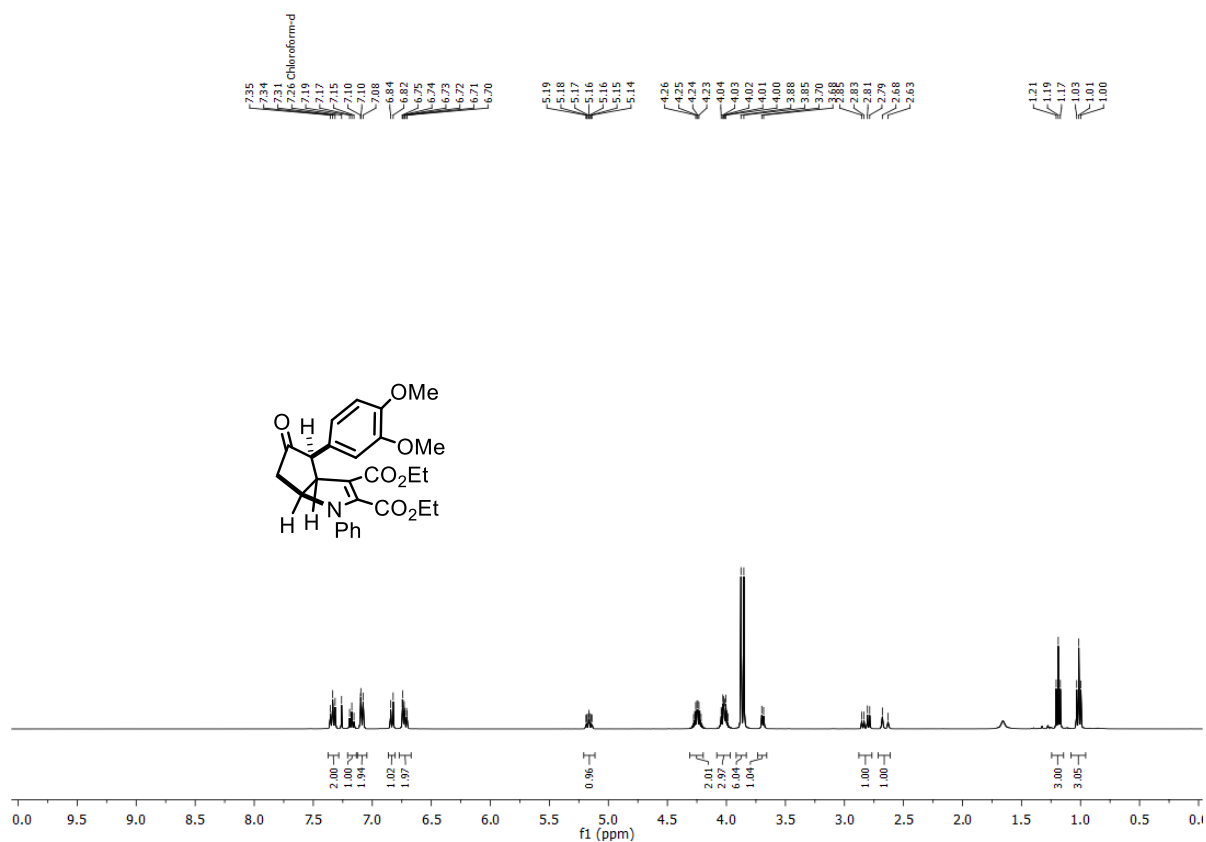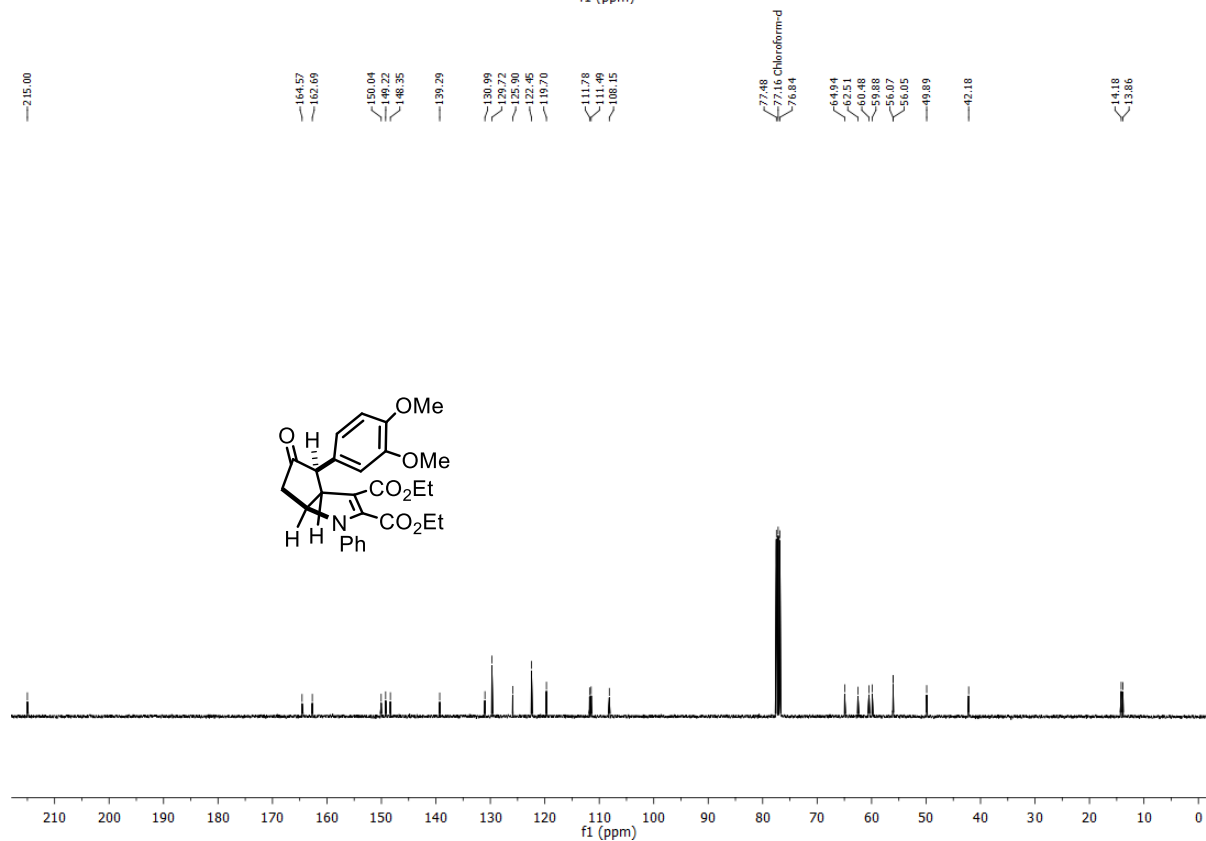



$^1\text{H}$  NMR spectra at 400MHz and  $^{13}\text{C}$  NMR spectra at 100MHz in  $\text{CDCl}_3$  (32)

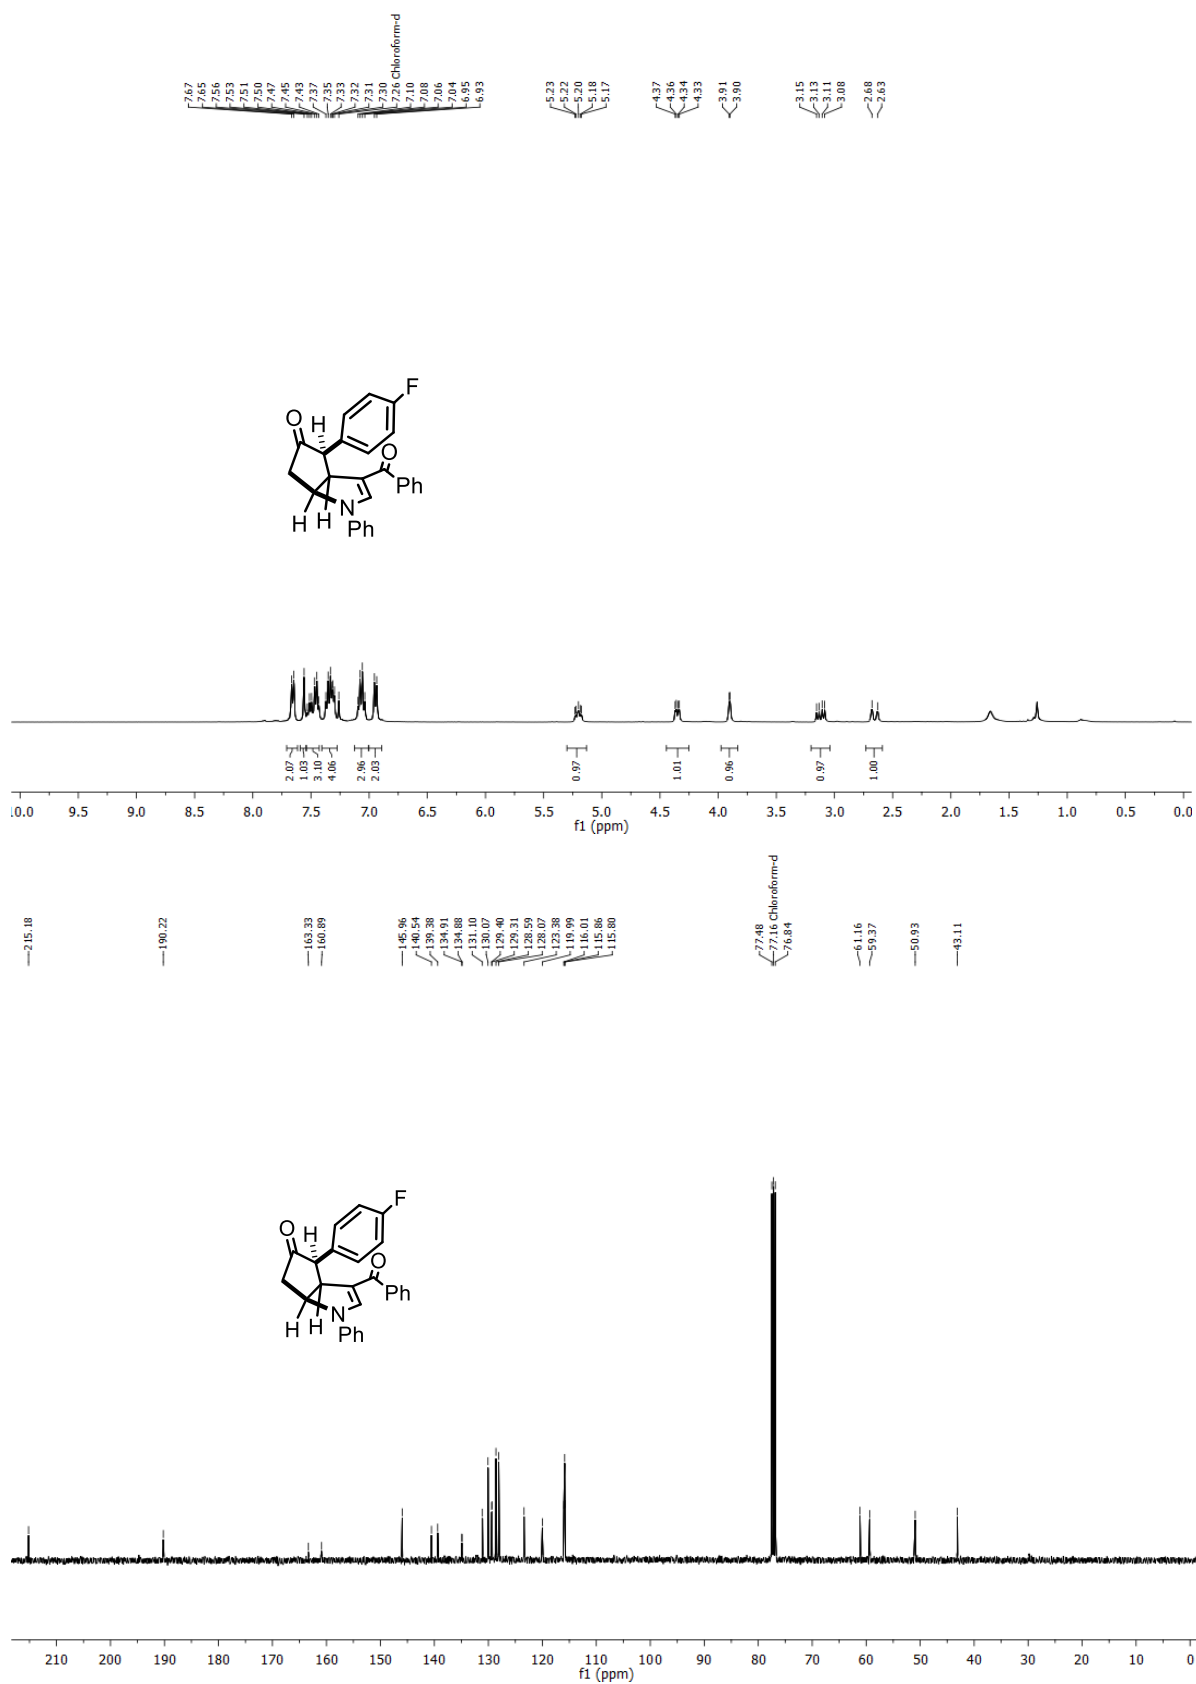

<sup>19</sup>F-NMR spectra at 400MHz (**32**)

—115.90

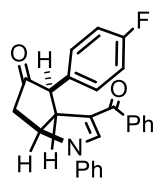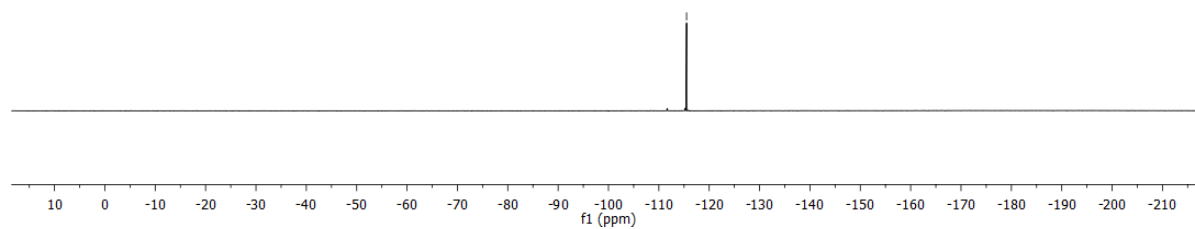

$^1\text{H}$  NMR spectra at 400MHz and  $^{13}\text{C}$  NMR spectra at 100MHz in  $\text{CDCl}_3$  (**33**)

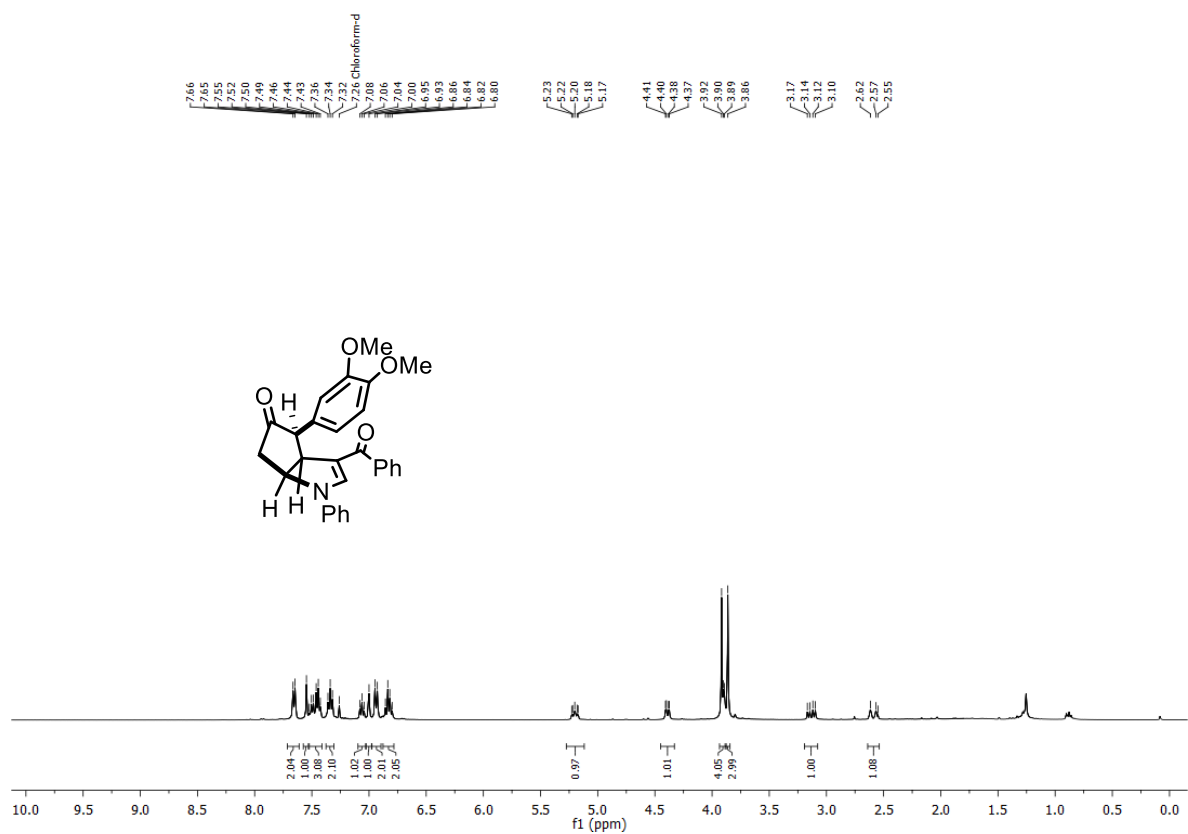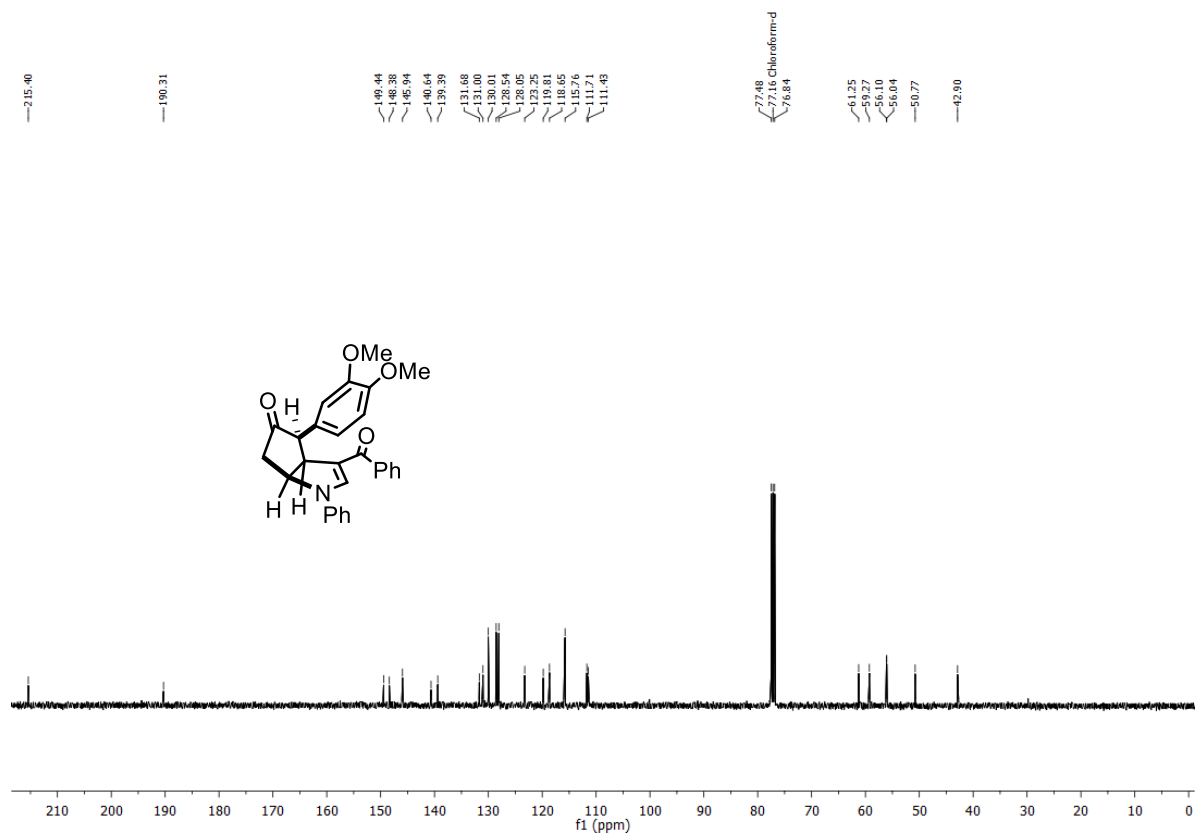

$^1\text{H}$  NMR spectra at 400MHz and  $^{13}\text{C}$  NMR spectra at 100MHz in  $\text{CDCl}_3$  (**34**)

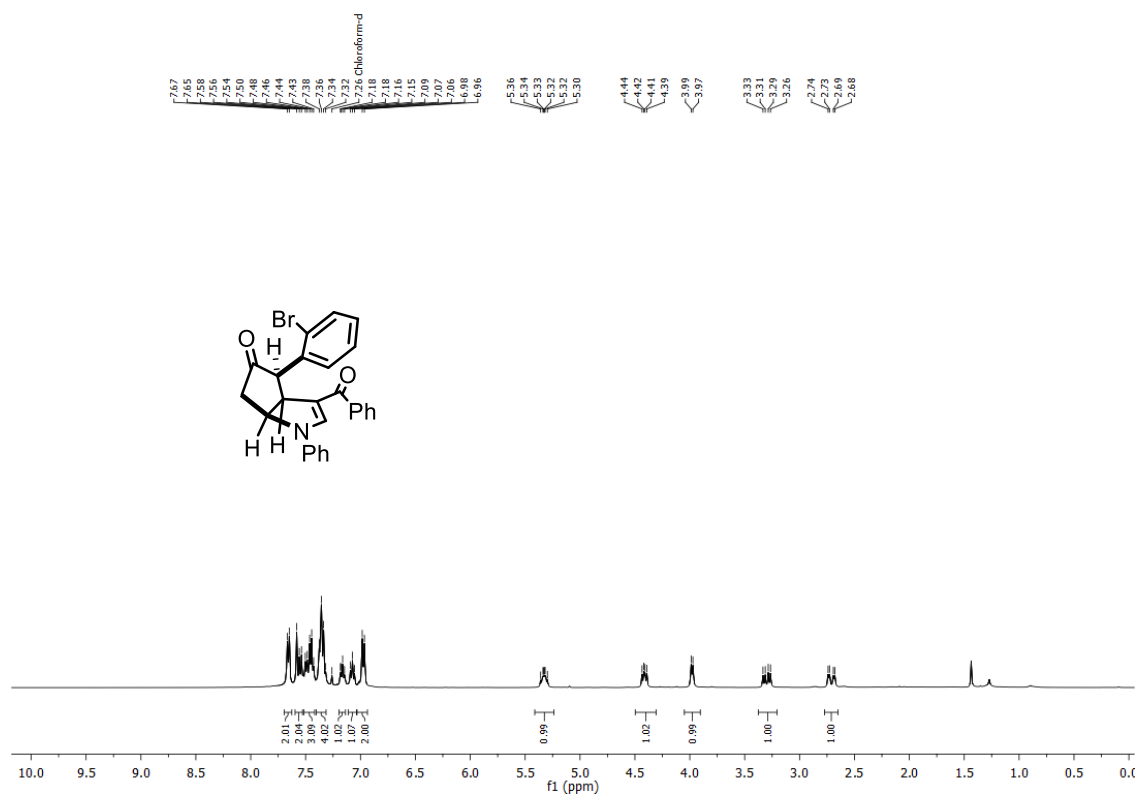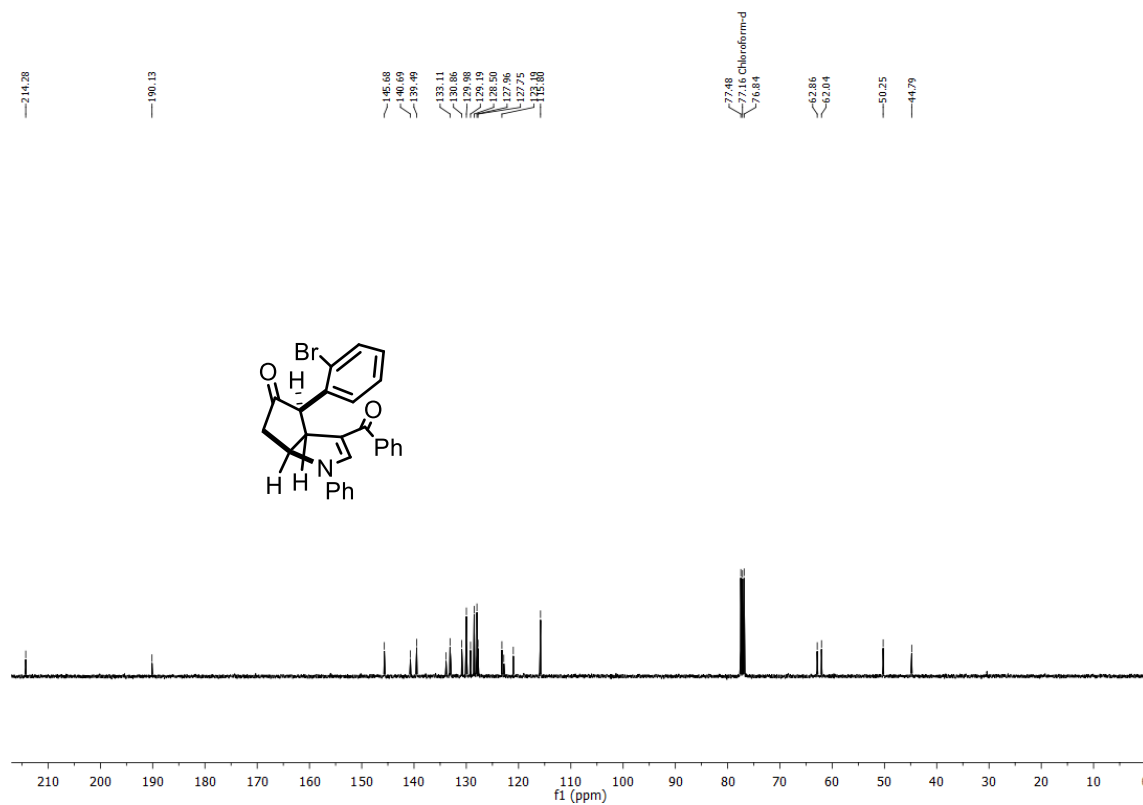

# HMBC (34)

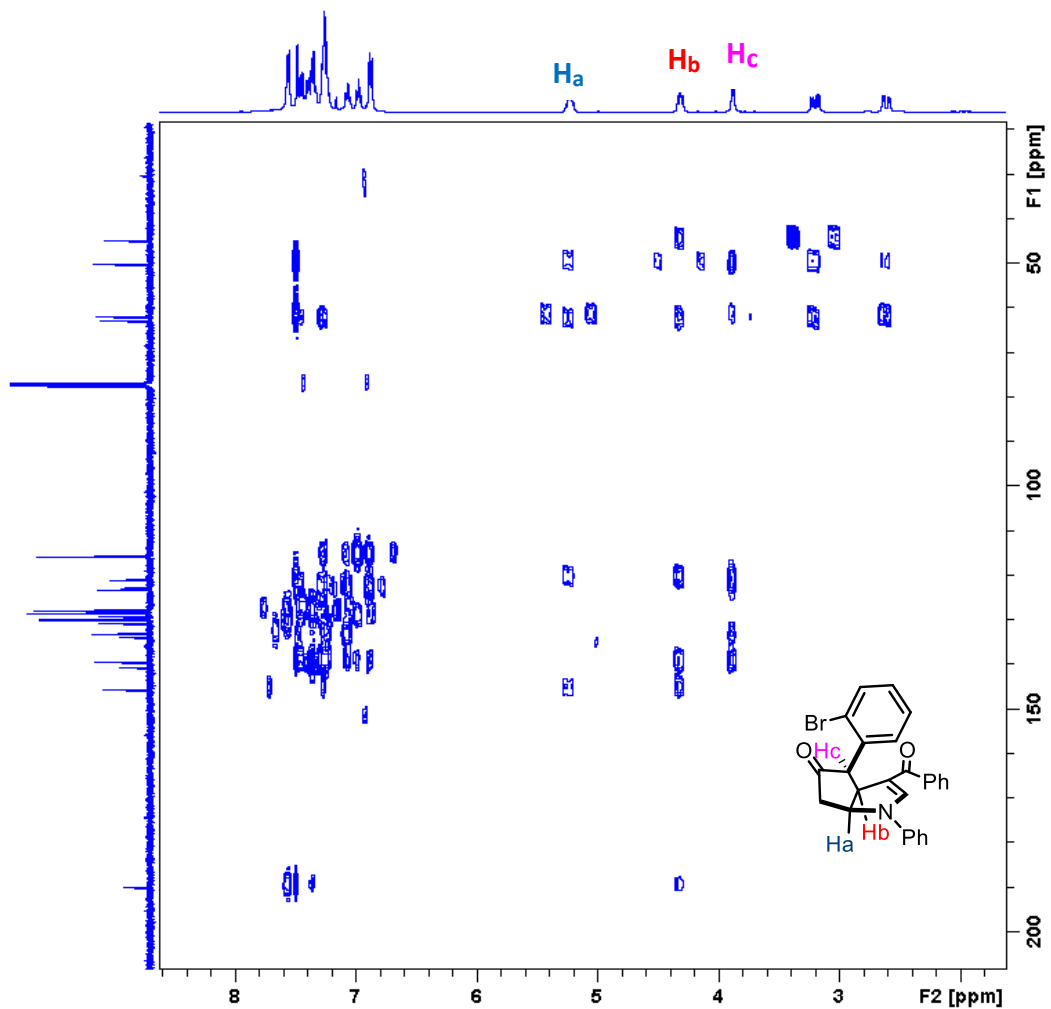

HSQC (34)

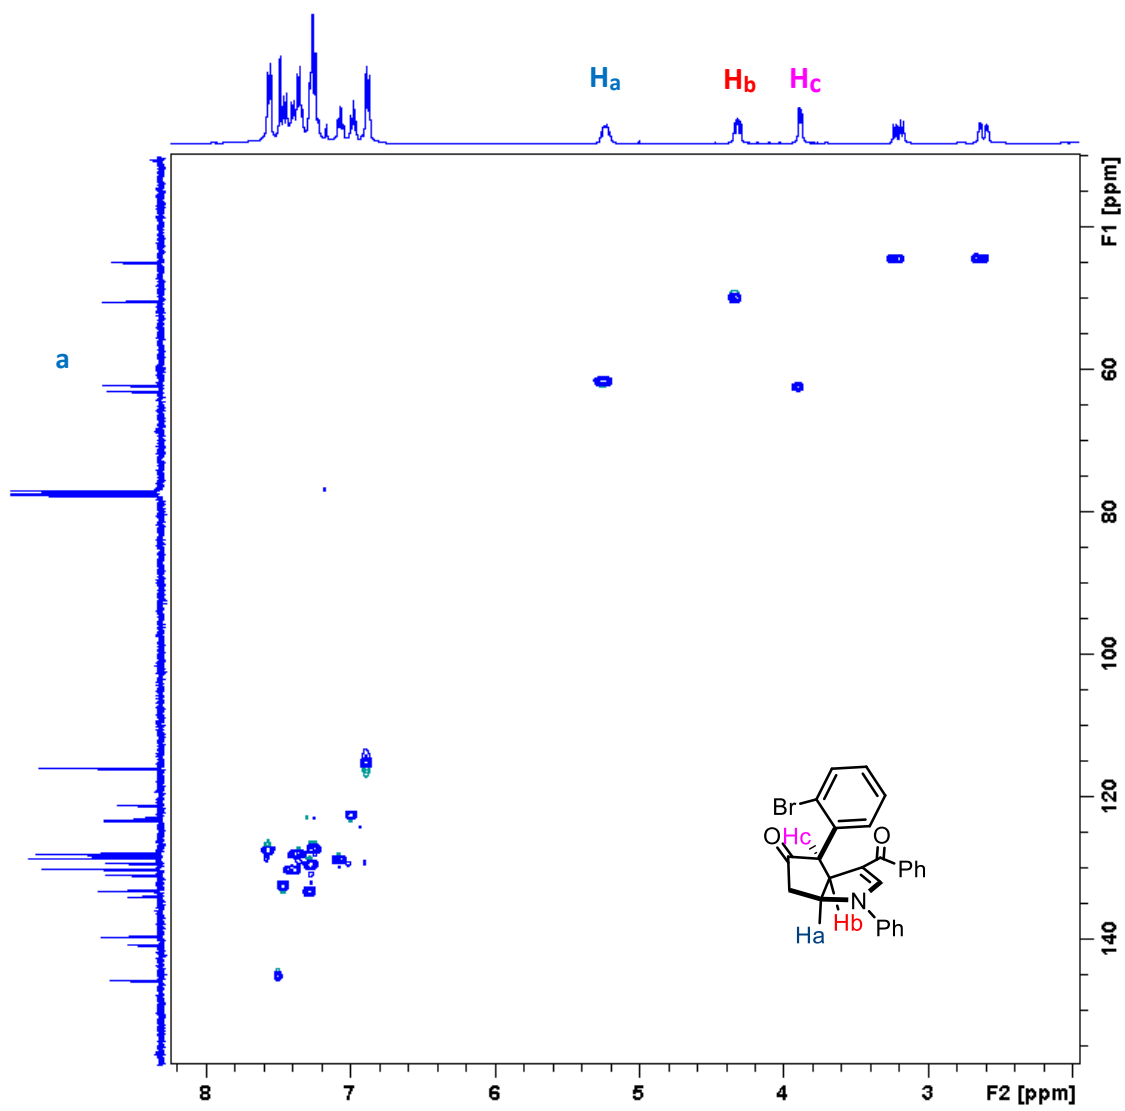

# NOESY (34)

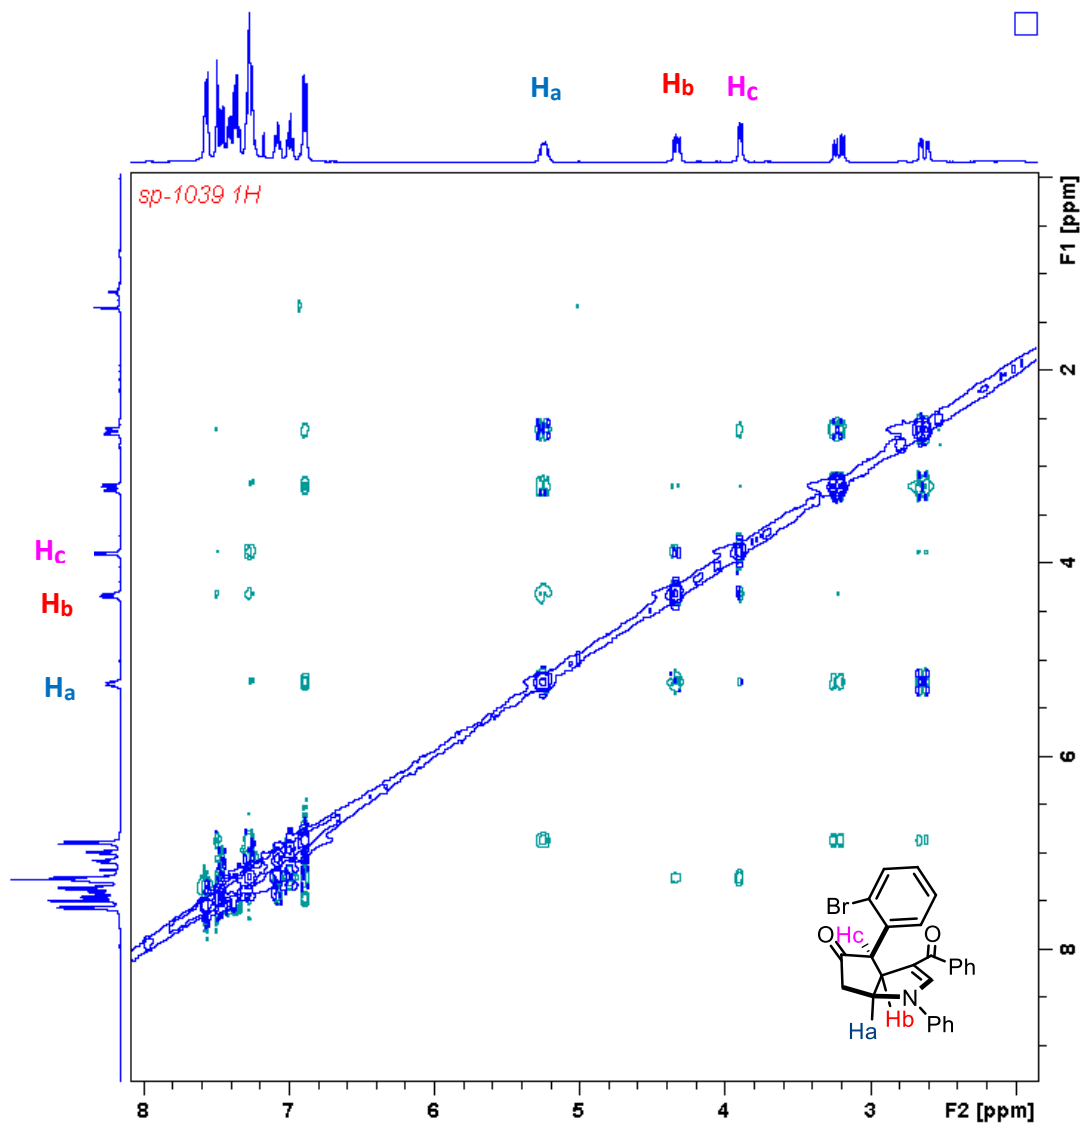

COSY (34)

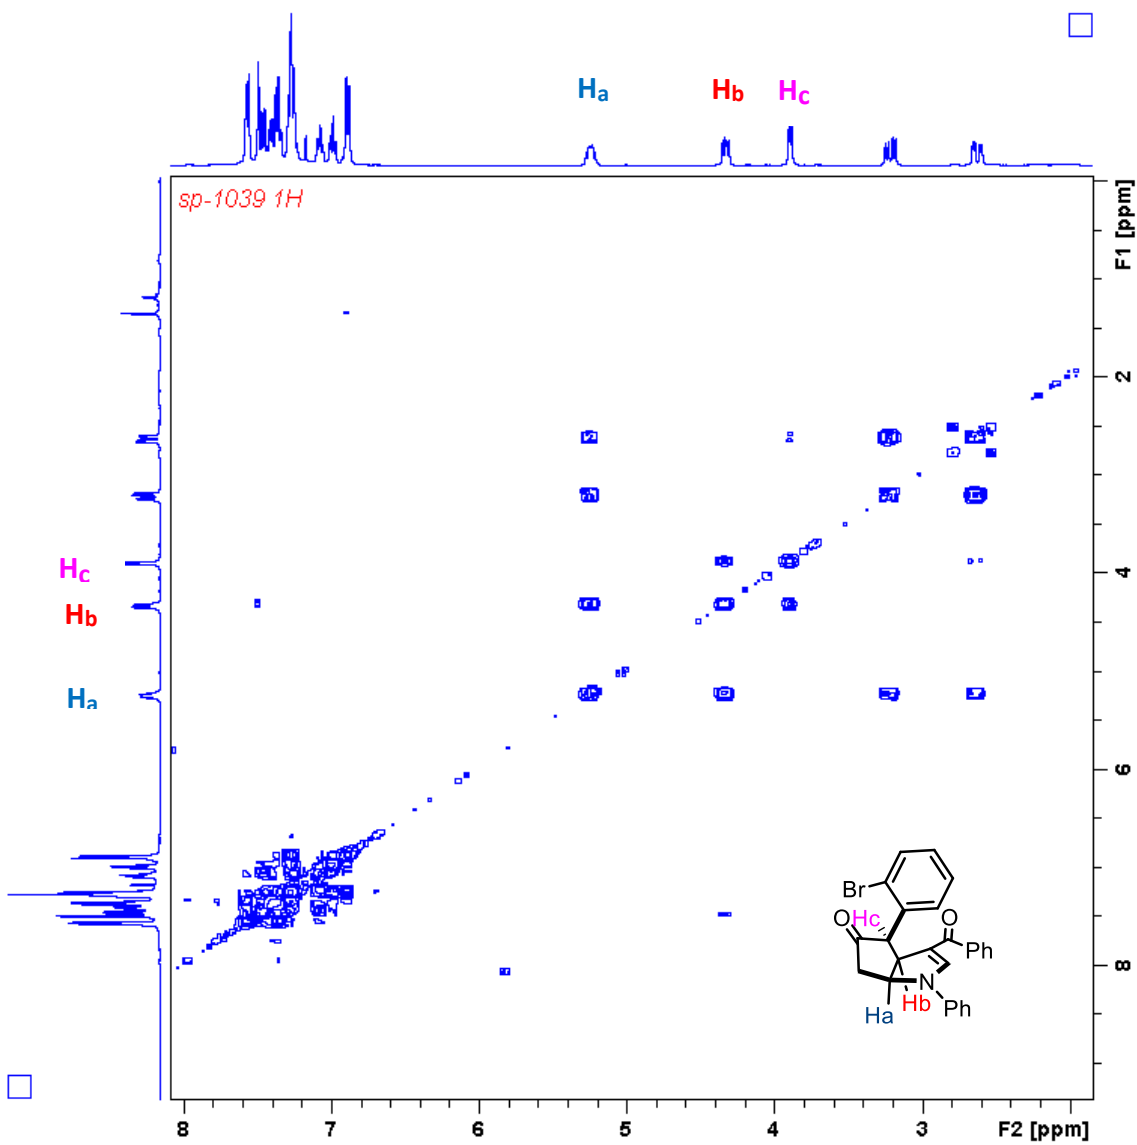



<sup>1</sup>H NMR spectra at 400MHz and <sup>13</sup>C NMR spectra at 100MHz in CDCl<sub>3</sub>(**35**)

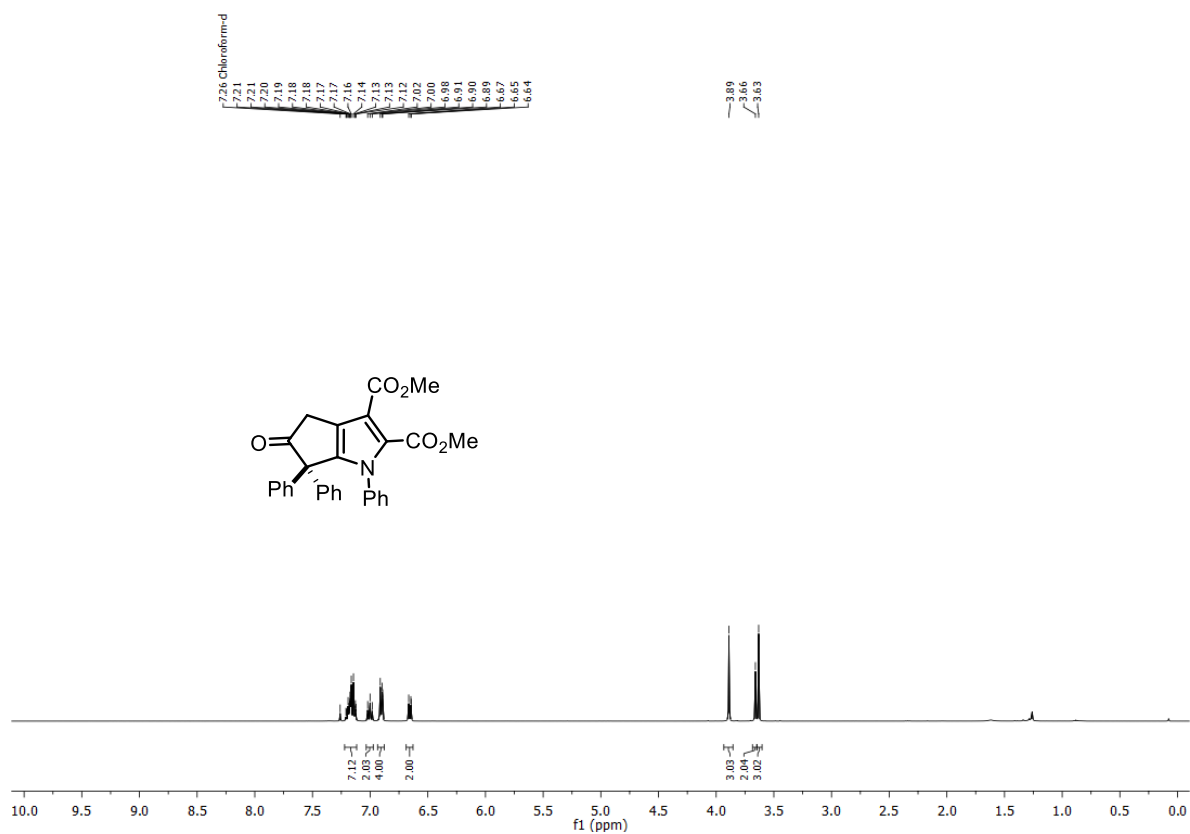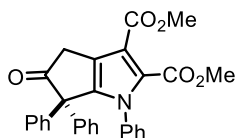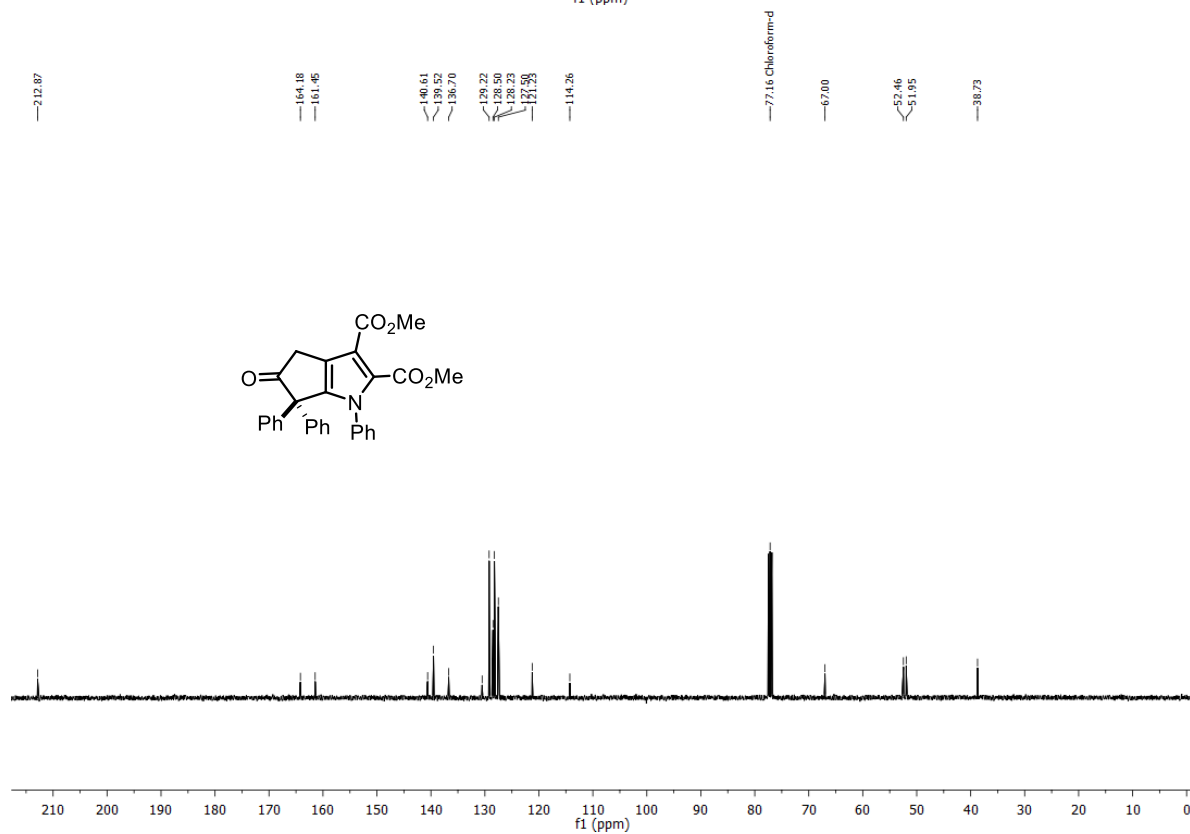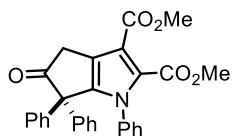

$^1\text{H}$  NMR spectra at 400MHz and  $^{13}\text{C}$  NMR spectra at 100MHz in  $\text{CDCl}_3$  (**36**)

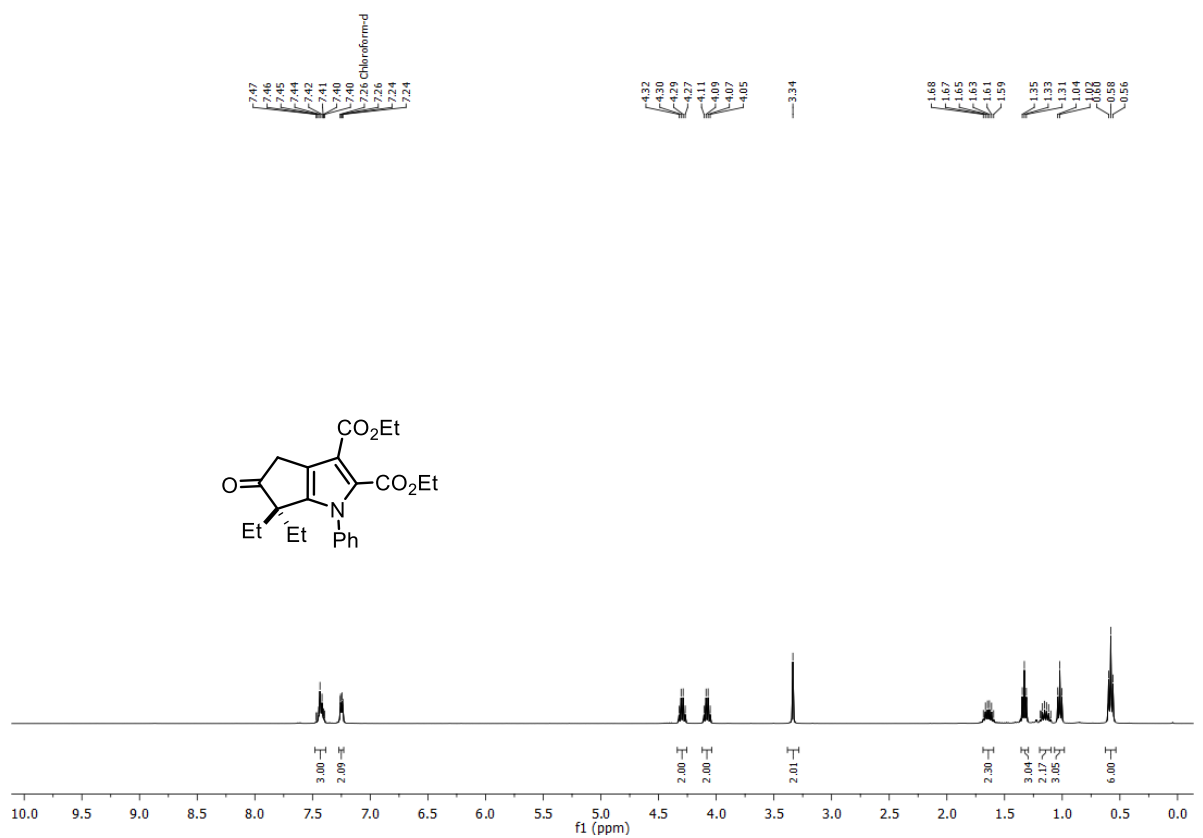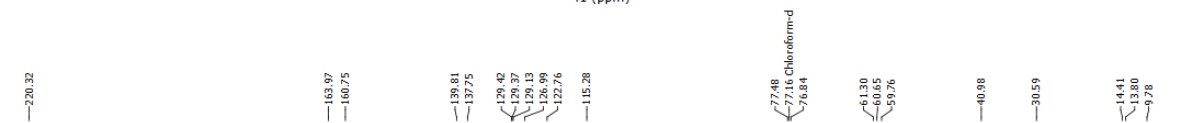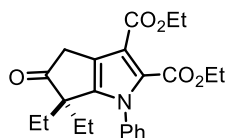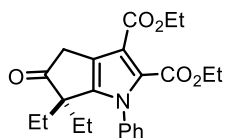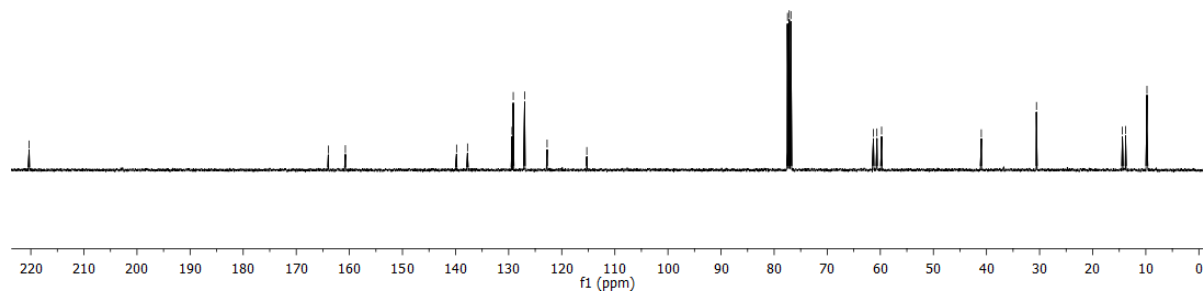

$^1\text{H}$  NMR spectra at 400MHz and  $^{13}\text{C}$  NMR spectra at 100MHz in  $\text{CDCl}_3$ (**38**)

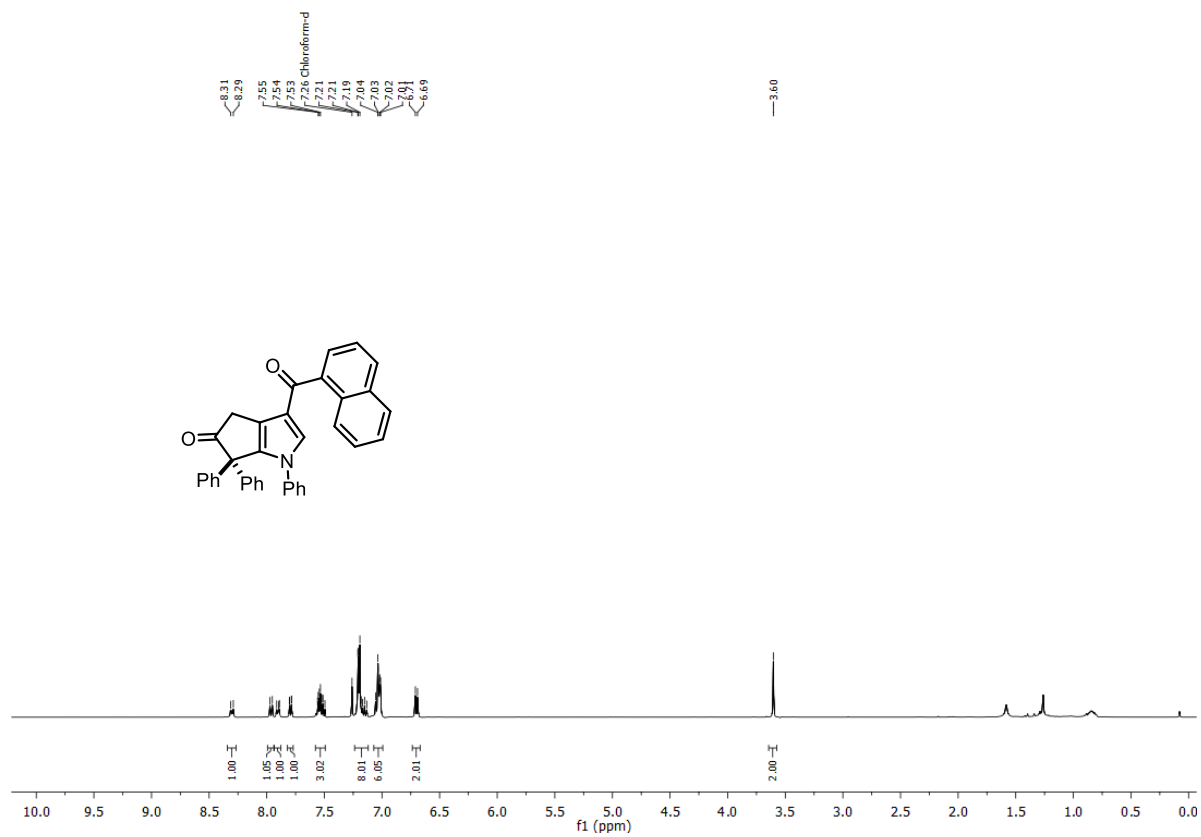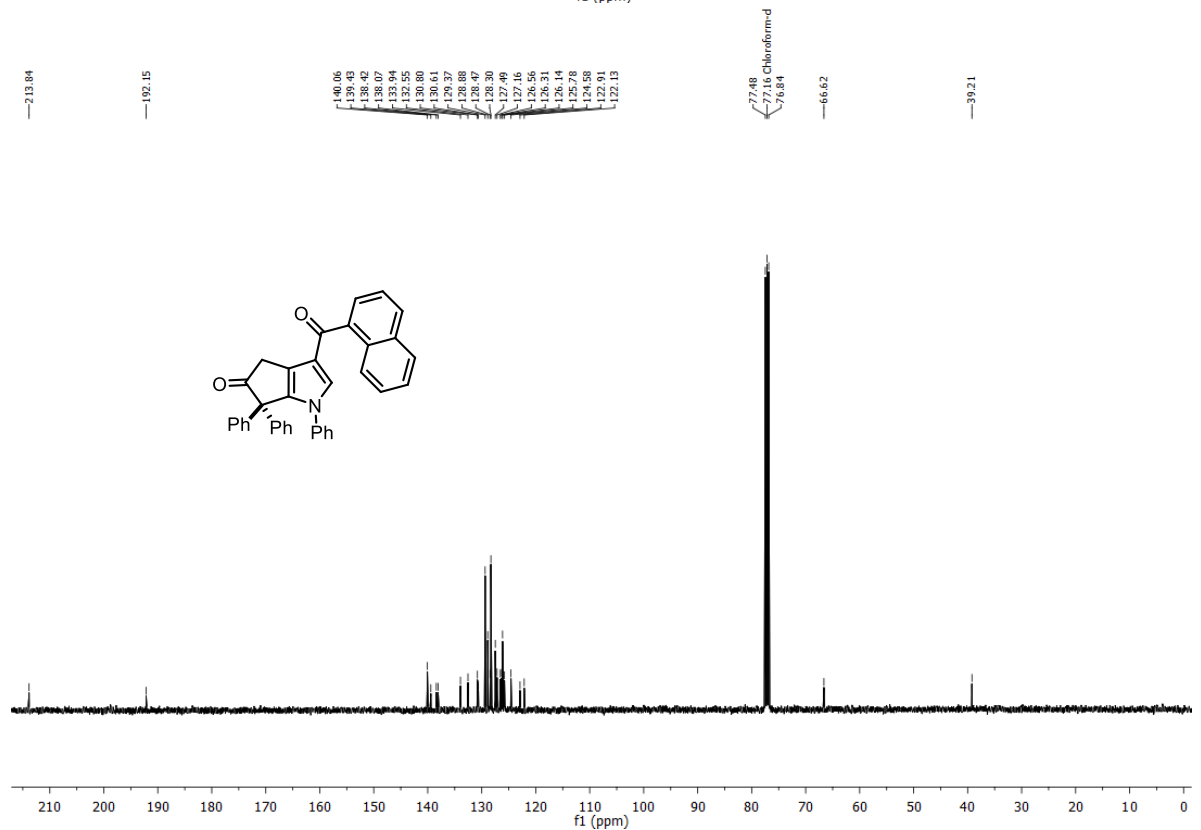

$^1\text{H}$  NMR spectra at 400MHz and  $^{13}\text{C}$  NMR spectra at 100MHz in  $\text{CDCl}_3$  (**39**)

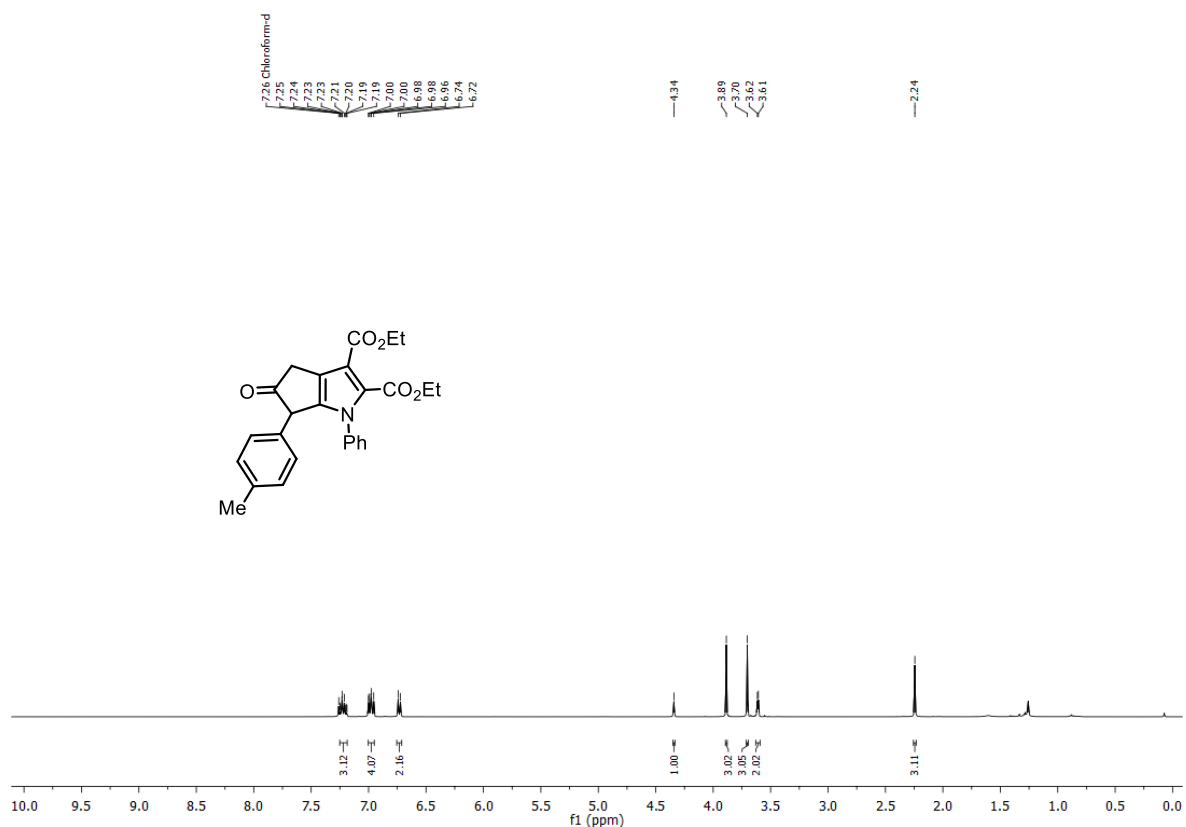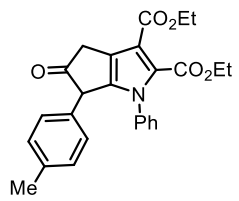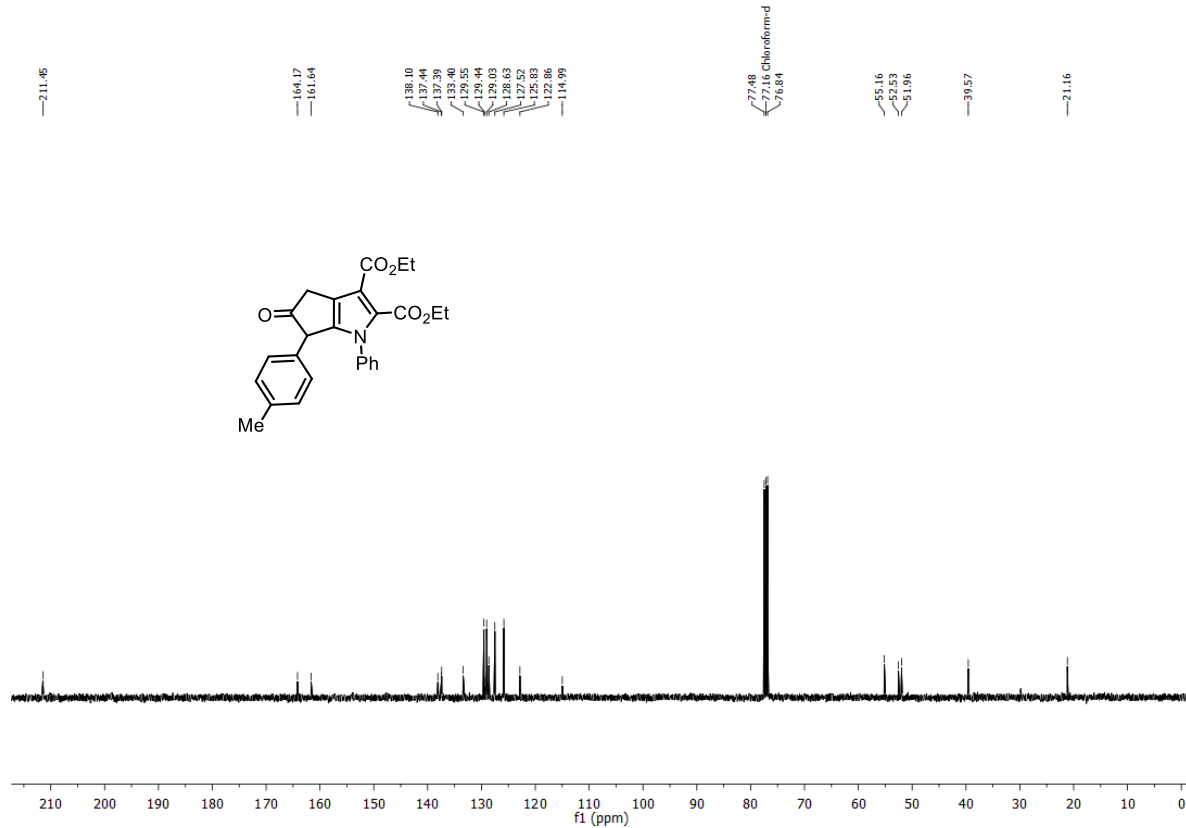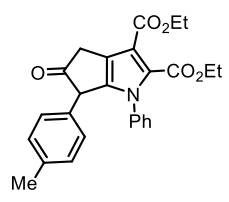

$^1\text{H}$  NMR spectra at 400MHz and  $^{13}\text{C}$  NMR spectra at 100MHz in  $\text{CDCl}_3$  (40)

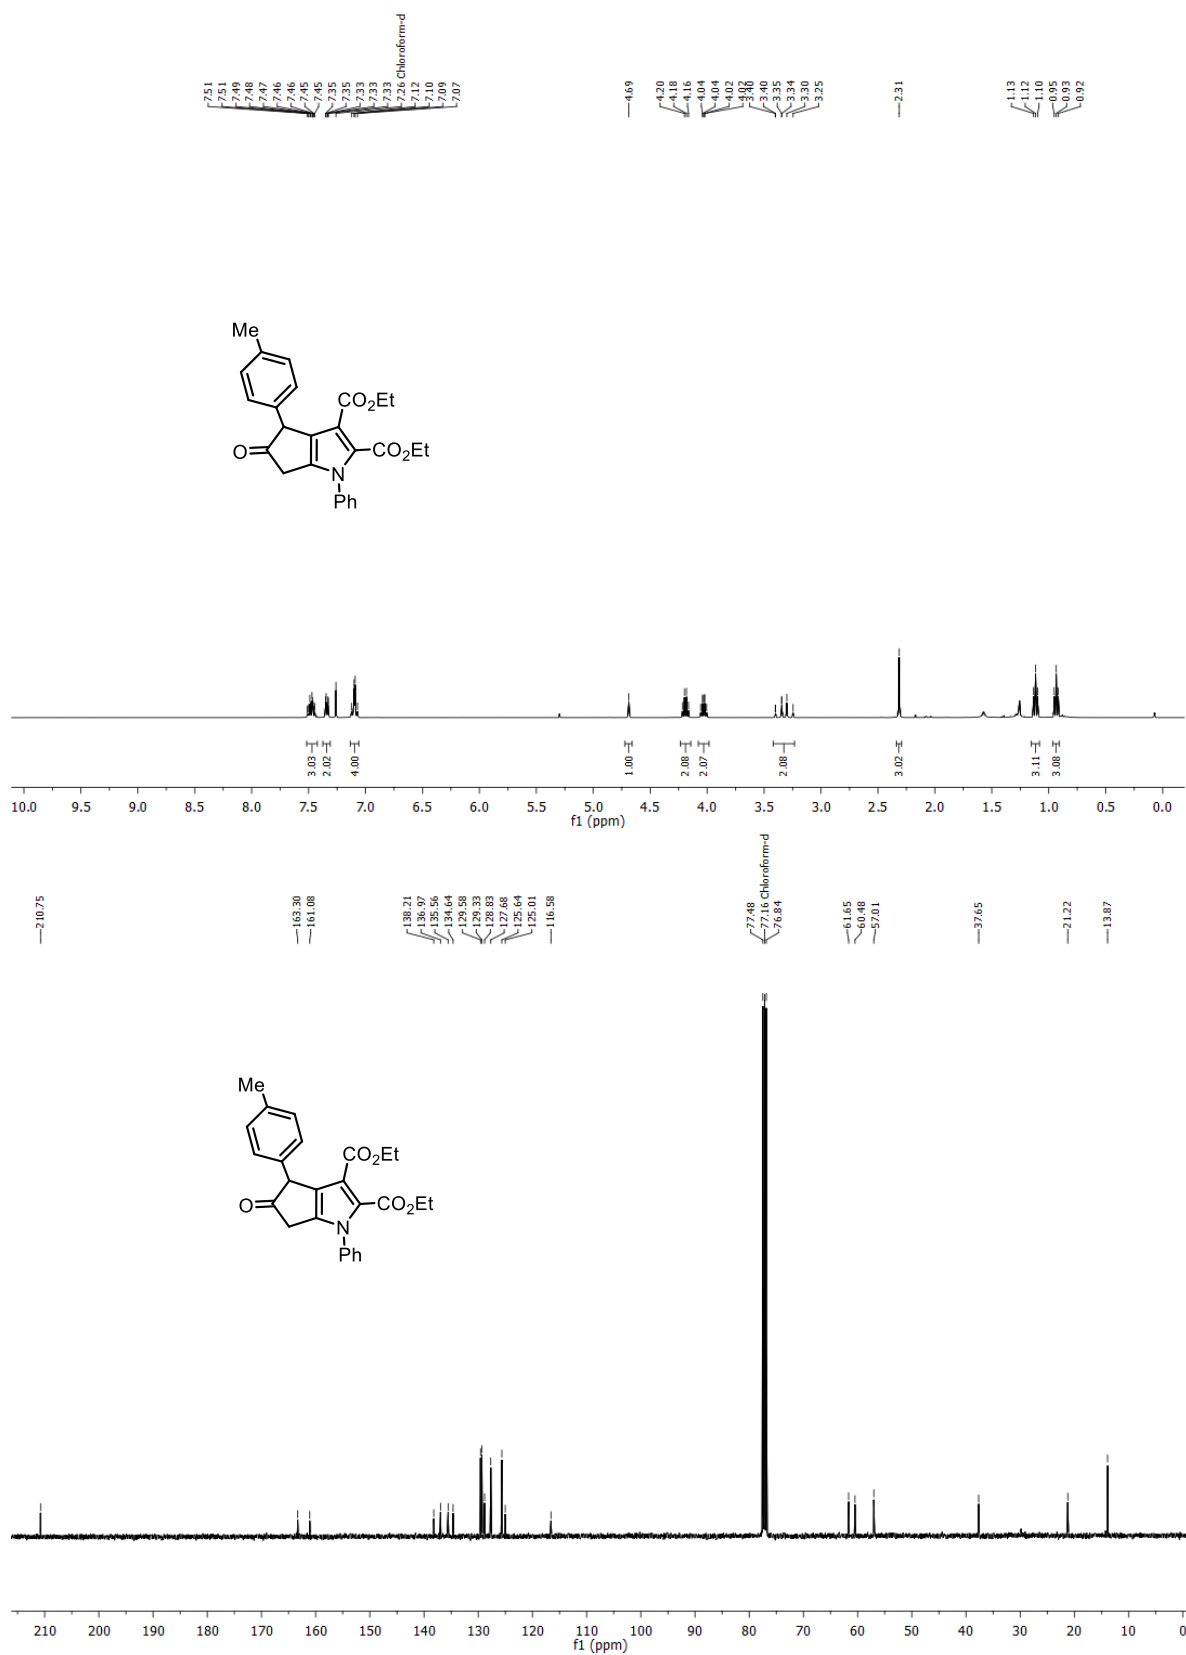

<sup>1</sup>H NMR spectra at 400MHz and <sup>13</sup>C NMR spectra at 100MHz in DMSO (41)

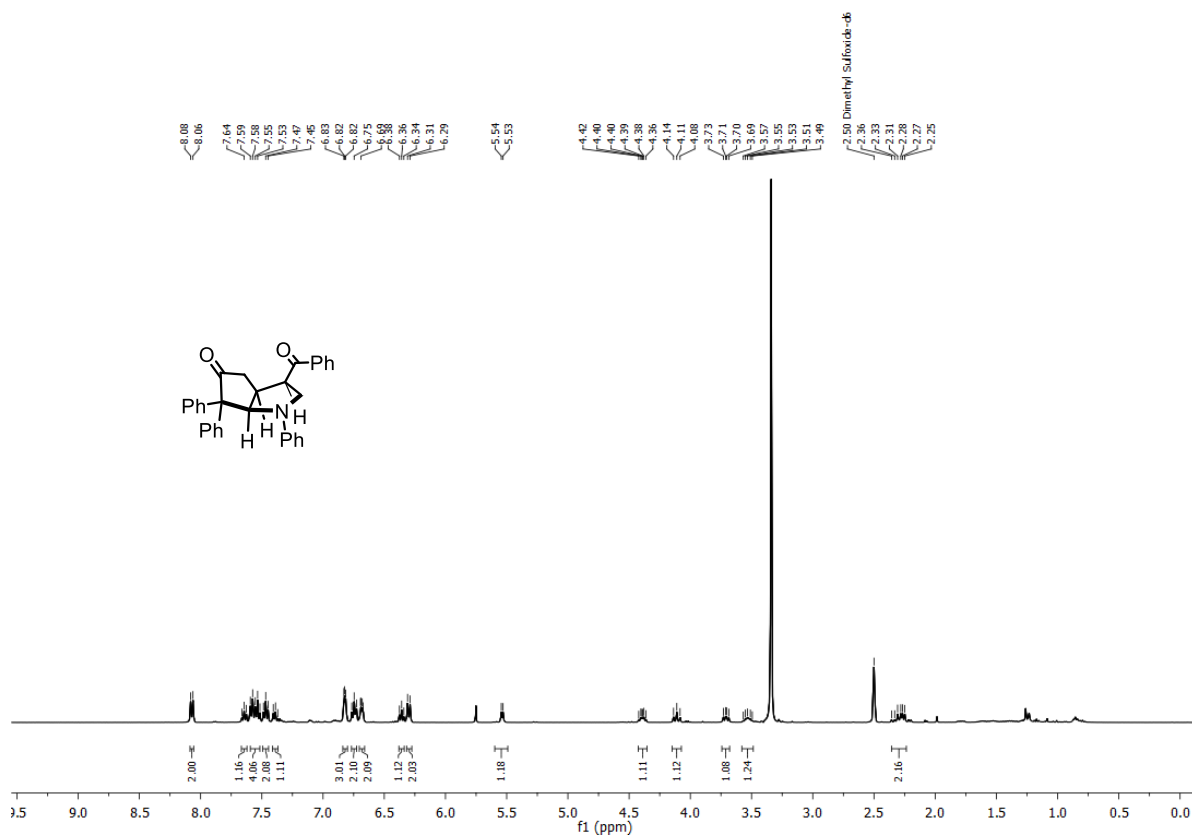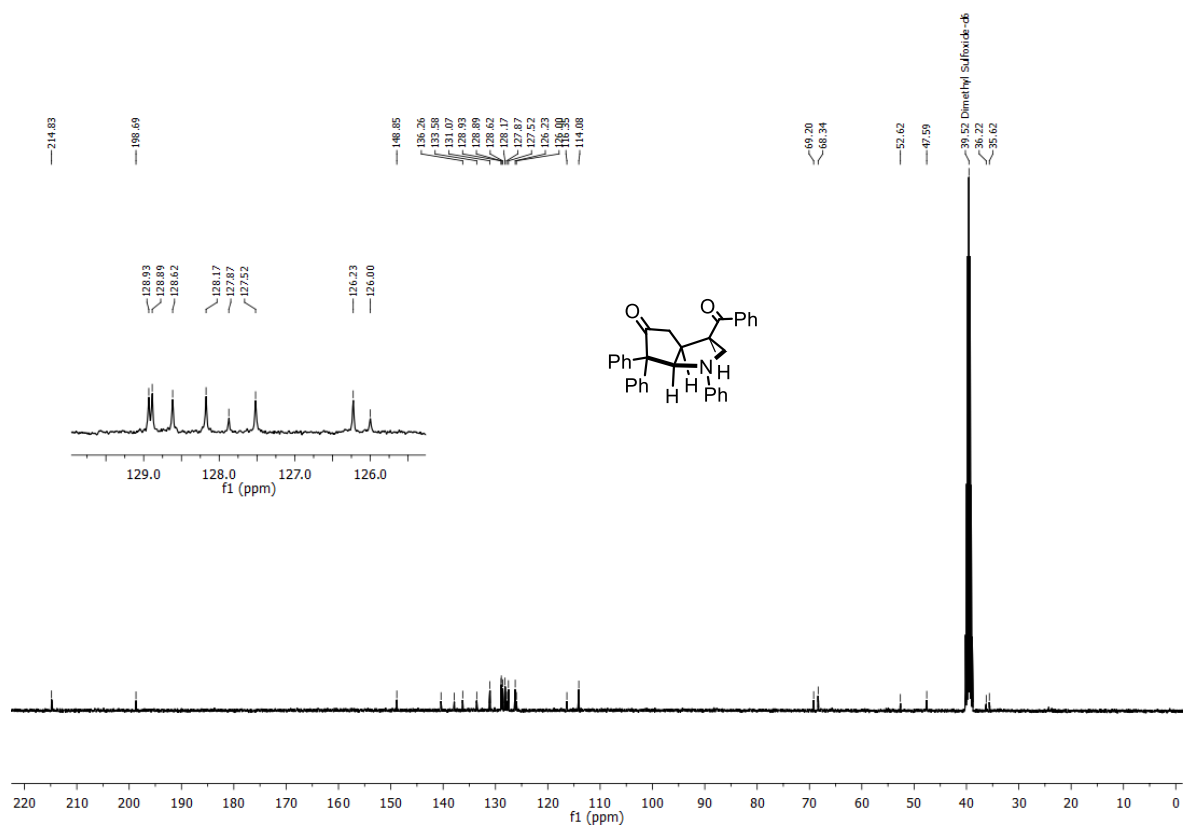

<sup>1</sup>H NMR spectra at 400MHz and <sup>13</sup>C NMR spectra at 100MHz in DMSO (42)

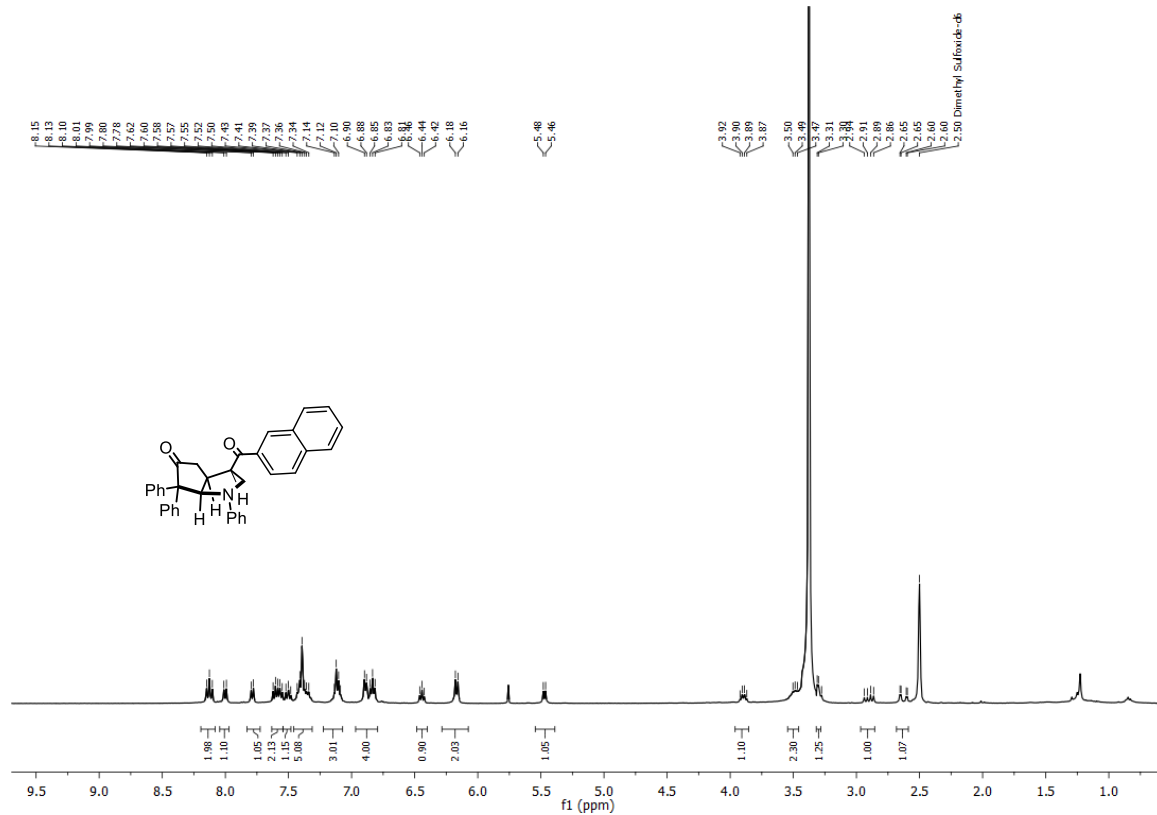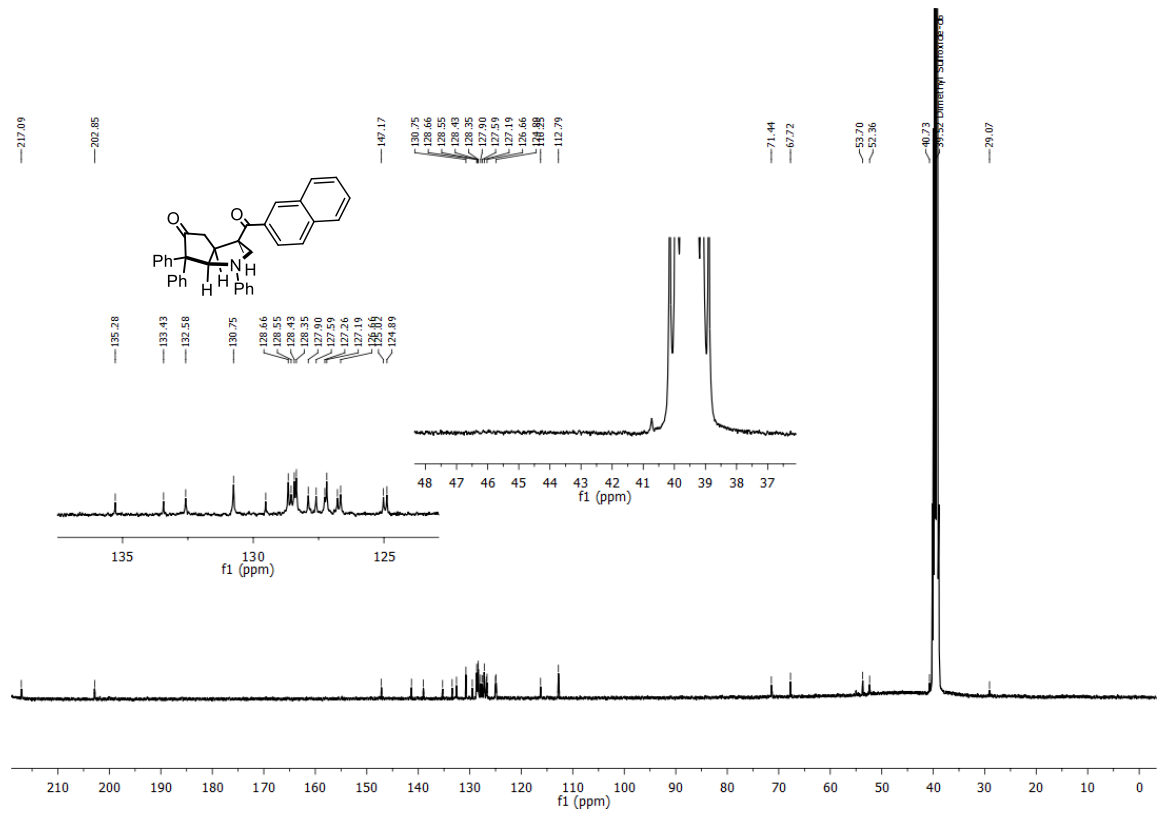

### <sup>1</sup>H-COSY (41)

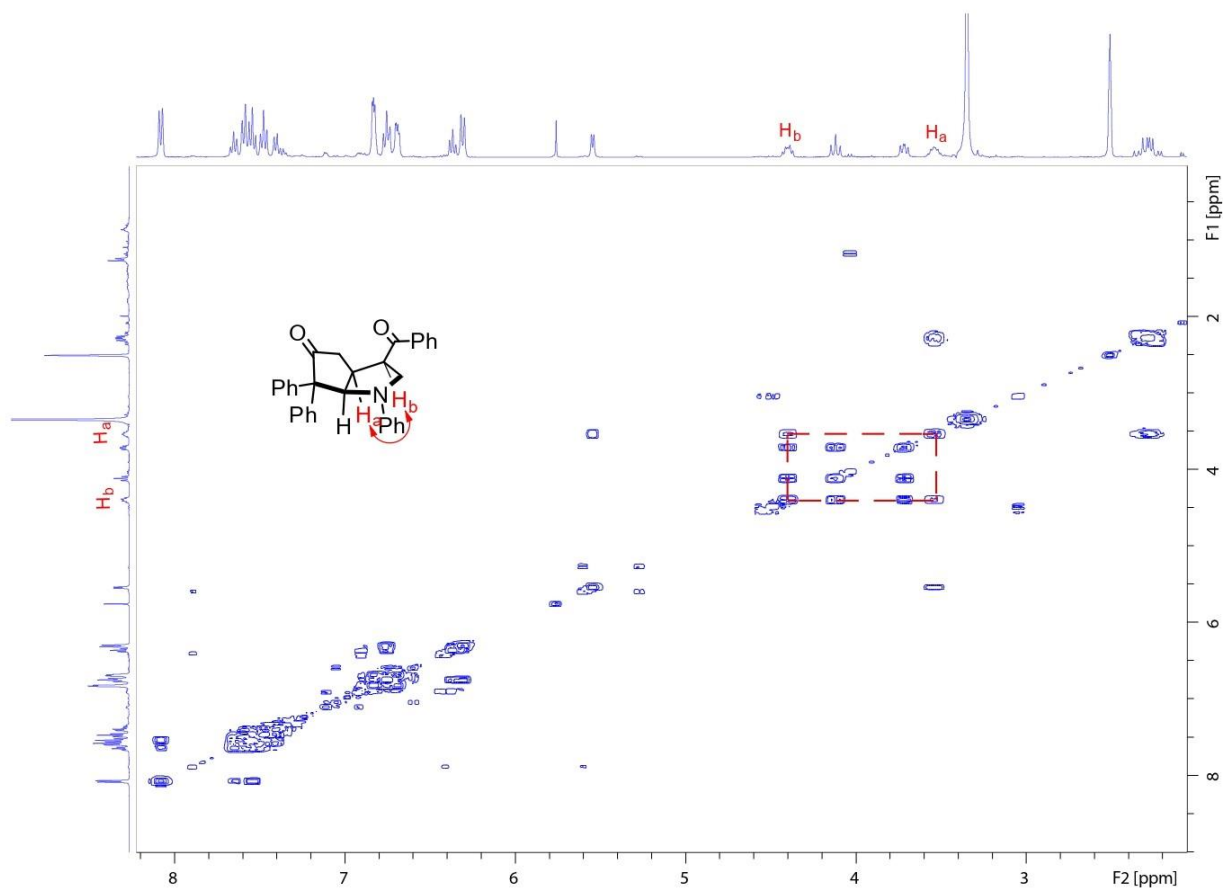

### HSQC (41)

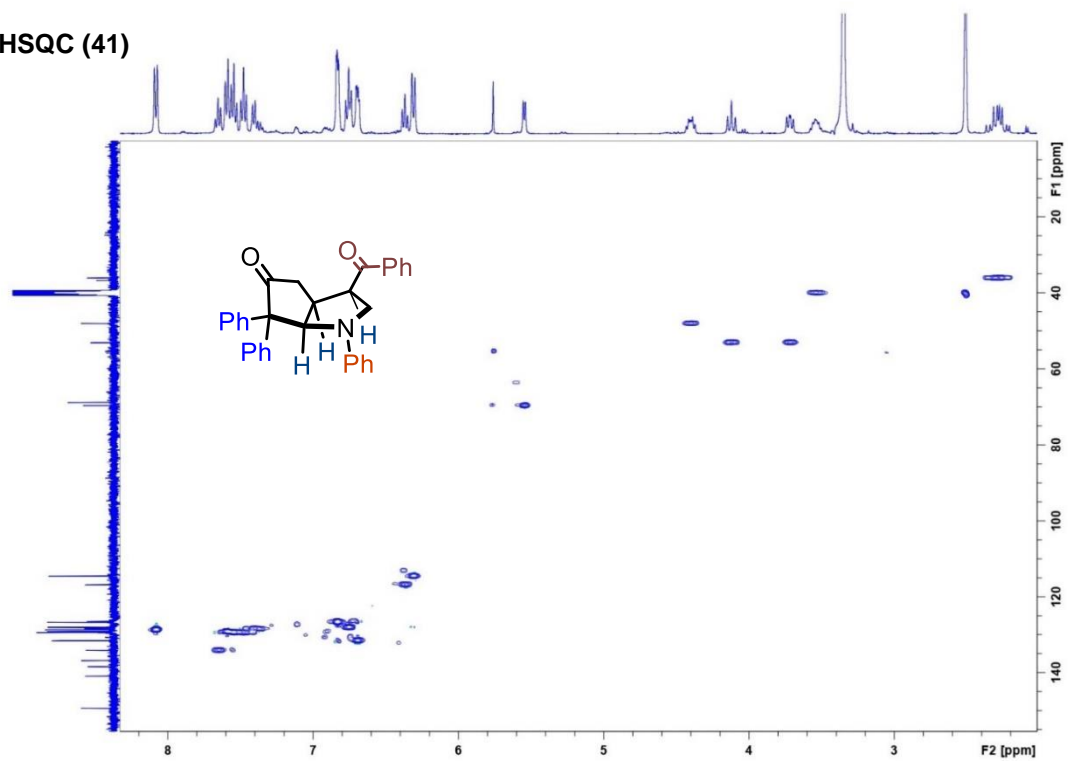



# NOESY (41)

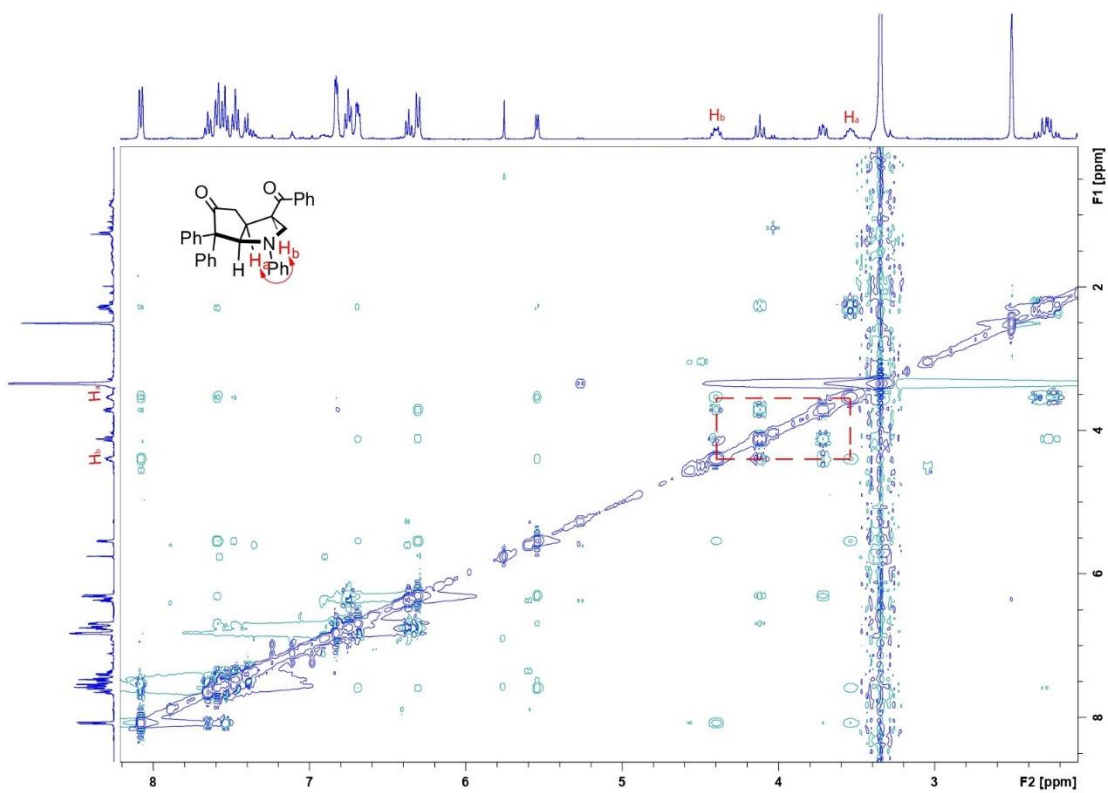

<sup>1</sup>H NMR spectra at 400 MHz and <sup>13</sup>C NMR spectra at 100MHz in CDCl<sub>3</sub> (46)

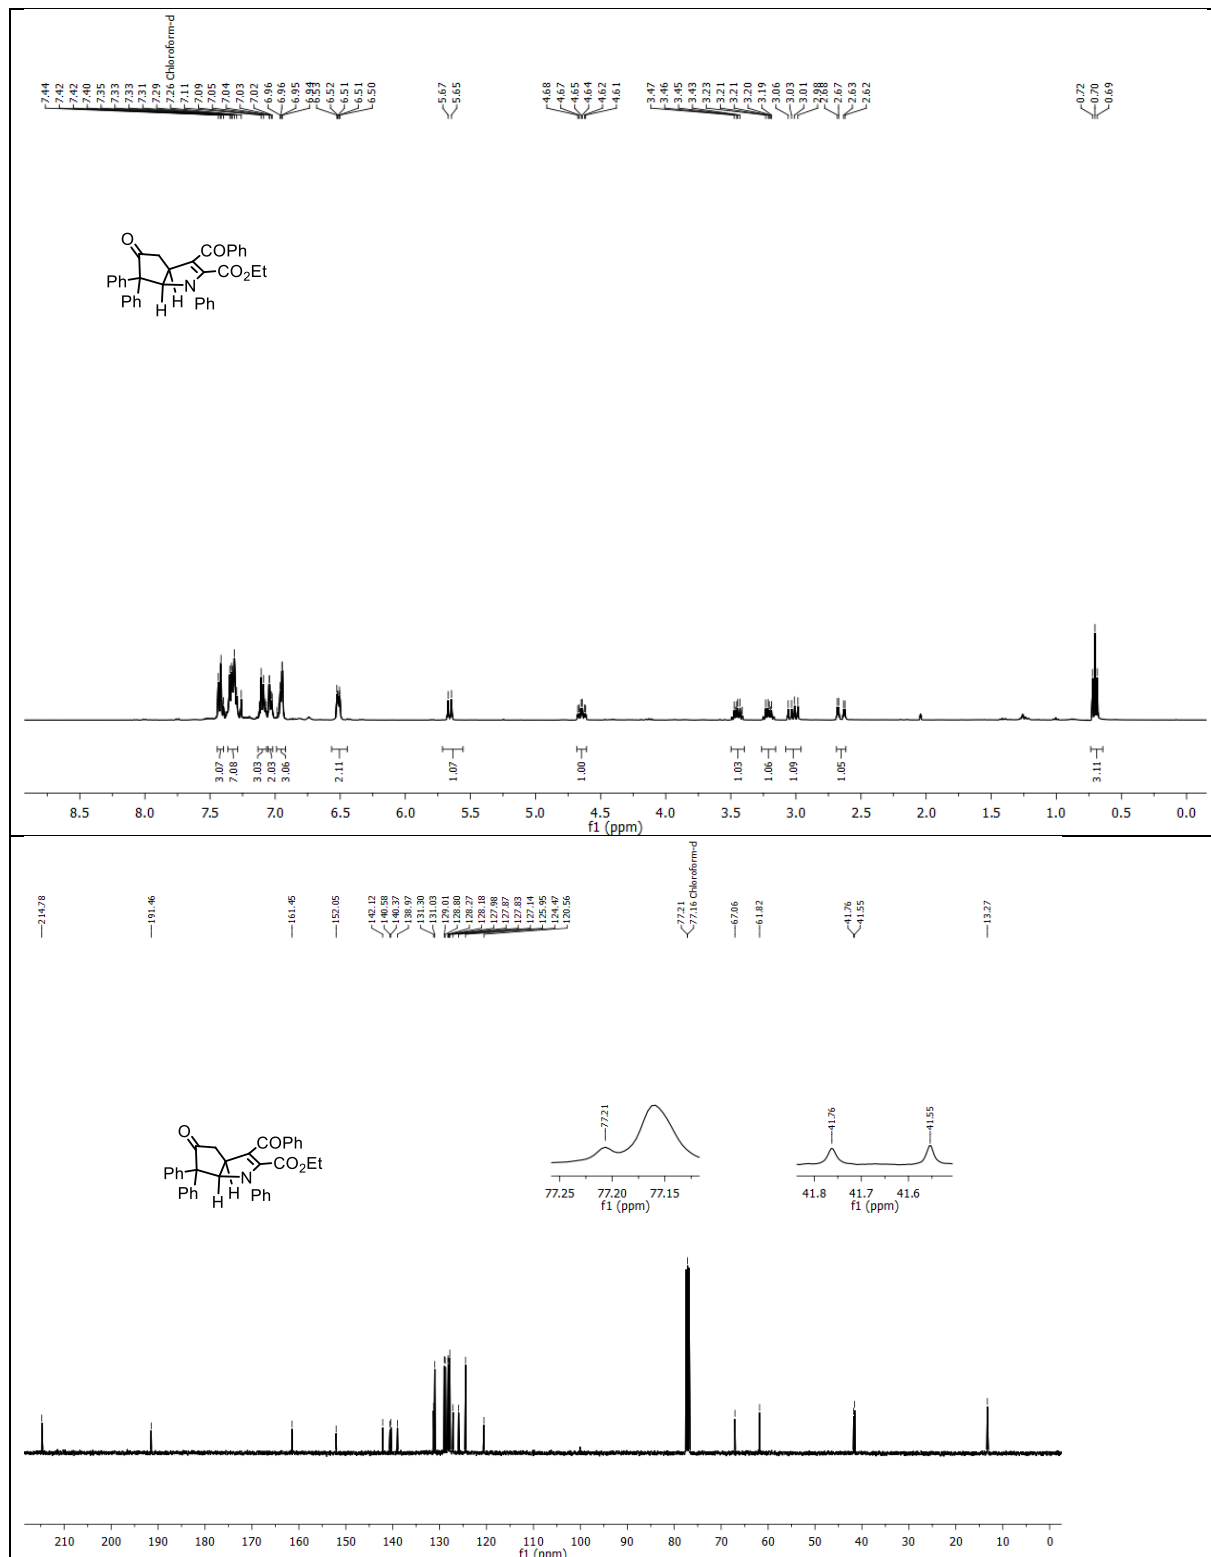

## 14. References

1. C. Jagadeesh, B. Mondal, S. Pramanik, D. Das and J. Saha, *Angew. Chem. Int. Ed.*, **2021**, 60, 8808-8812.
2. Y. Cai, Y. Tang, I. Atodiresei and M. Rueping, *Angew. Chem., Int. Ed.*, **2016**, 55, 14126.
3. (a) G.-C. Ge, D.-L. Mo, C.-H. Ding, L.-X. Dai and X.-L. Hou, *Org. Lett.*, **2012**, 14, 5756-5759;  
(b) F. Shi, S. -W. Luo, Z.-L. Tao, L. He, J. Yu, S.-J. Tu, and L.-Z. Gong, *Org. Lett.*, **2011**, 13, 4680 – 4683.
4. B. Majumder and G. Pandey, *Eur. J. Org. Chem.*, **2020**, 25, 3883-3888.
5. See Ref. 16 from the main text of the manuscript.
